# Supplementary material for: Housing and child health in sub-Saharan Africa: A cross-sectional analysis
Source: PubMed Central journal article supplement (PMC7089421; doi:10.1371/journal.pmed.1003055), 2020-03-23
Supplement: pmed.1003055.s004.pdf [file pmed.1003055.s004.pdf]

**S4. Text.** Characteristics of included surveys and prevalence of health outcomes by survey**Table A.** Household-level characteristics of included surveys

| Survey                 | N     | Urban residence (%) | Improved drinking water source (%) | Improved sanitation (%) | House built with finished materials (%) | Improved house (%) | No smoking inside home (%) | Modern cooking fuel (%) | Not crowded ( $\leq 3$ people / bedroom) (%) | IRS in past 12 months (%) | Household head attended secondary education (%) |
|------------------------|-------|---------------------|------------------------------------|-------------------------|-----------------------------------------|--------------------|----------------------------|-------------------------|----------------------------------------------|---------------------------|-------------------------------------------------|
| Angola 2011 MIS        | 8391  | 39.5                | 48.1                               | 44.9                    | 45.6                                    | 15.0               | -                          | 39.9                    | 48.8                                         | -                         | -                                               |
| Angola 2015 DHS        | 16109 | 55.1                | 50.4                               | 56.1                    | 43.7                                    | 15.0               | 79.9                       | 40.3                    | 58.4                                         | 1.5                       | 37.1                                            |
| Benin 2001 DHS         | 5769  | 35.2                | 53.3                               | 17.0                    | 54.3                                    | -                  | -                          | 0.8                     | -                                            | -                         | 17.0                                            |
| Benin 2006 DHS         | 17511 | 41.3                | 70.3                               | 17.2                    | 56.6                                    | 7.6                | -                          | 3.5                     | 60.4                                         | -                         | 19.2                                            |
| Benin 2012 DHS         | 17422 | 40.8                | 77.2                               | 29.1                    | 60.8                                    | 14.3               | 88.3                       | 4.6                     | 53.3                                         | 7.5                       | 20.4                                            |
| Burkina Faso 2010 DHS  | 14424 | 30.6                | 79.0                               | 32.9                    | 48.7                                    | 18.7               | 72.9                       | 5.1                     | 67.6                                         | 1.5                       | 10.9                                            |
| Burkina Faso 2014 MIS  | 6448  | 20.4                | 76.8                               | 42.6                    | 45.1                                    | 17.1               | -                          | 6.7                     | 60.9                                         | 0.8                       | -                                               |
| Burundi 2010 DHS       | 8596  | 19.5                | 76.1                               | 44.3                    | 42.8                                    | 14.5               | 67.6                       | 0.2                     | 68.1                                         | 0.6                       | 11.7                                            |
| Burundi 2012 MIS       | 4866  | 18.1                | 80.5                               | 77.7                    | 42.9                                    | 23.7               | -                          | 0.0                     | 71.2                                         | 4.8                       | 11.2                                            |
| Burundi 2016 DHS       | 15977 | 18.8                | 83.0                               | 54.8                    | 54.7                                    | 25.1               | 77.1                       | 0.2                     | 71.1                                         | 0.9                       | 13.1                                            |
| Cameroon 2011 DHS      | 14214 | 47.2                | 68.0                               | 56.5                    | 60.9                                    | 31.0               | -                          | 16.4                    | 74.0                                         | 3.2                       | 39.0                                            |
| Comoros 2012 DHS       | 4482  | 42.2                | 89.3                               | 38.2                    | 80.4                                    | 20.4               | 74.7                       | 4.4                     | 67.0                                         | 14.2                      | 32.5                                            |
| Congo 2005 DHS         | 5879  | 65.5                | 71.5                               | 20.5                    | 70.5                                    | 12.0               | -                          | 12.6                    | 59.3                                         | -                         | 63.0                                            |
| Congo 2011 DHS         | 11632 | 27.1                | 53.1                               | 23.1                    | 53.5                                    | 10.9               | 76.4                       | 7.5                     | 60.1                                         | -                         | 58.6                                            |
| Cote d'Ivoire 2012 DHS | 9686  | 41.4                | 79.0                               | 45.5                    | 74.2                                    | 23.3               | 74.3                       | 11.7                    | 61.0                                         | 1.4                       | 22.1                                            |
| DRC 2013 DHS           | 18171 | 29.9                | 40.3                               | 37.6                    | 19.8                                    | 5.6                | 69.6                       | 1.7                     | 56.9                                         | -                         | 52.8                                            |
| Ethiopia 2016 DHS      | 16650 | 31.4                | 69.2                               | 25.4                    | 27.5                                    | 9.9                | 82.9                       | 9.4                     | 36.9                                         | -                         | 19.7                                            |
| Gabon 2012 DHS         | 9755  | 54.8                | 80.4                               | 38.8                    | 70.7                                    | 26.5               | 68.1                       | 60.0                    | 80.7                                         | 3.2                       | 50.2                                            |
| Gambia 2013 DHS        | 6217  | 49.8                | 90.4                               | 58.2                    | 79.1                                    | 33.0               | 71.6                       | 2.3                     | 67.2                                         | 42.0                      | 25.4                                            |
| Ghana 2008 DHS         | 11778 | 43.9                | 77.6                               | 65.4                    | 79.8                                    | 30.2               | -                          | 12.4                    | 63.2                                         | -                         | 55.8                                            |
| Ghana 2014 DHS         | 11835 | 50.2                | 65.9                               | 68.0                    | 89.3                                    | 25.8               | 86.1                       | 21.0                    | 65.9                                         | 18.4                      | 57.6                                            |
| Ghana 2016 MIS         | 5841  | 48.2                | 61.1                               | 66.3                    | 86.2                                    | 22.2               | -                          | 22.0                    | 64.2                                         | 13.6                      | -                                               |
| Guinea 2012 DHS        | 7109  | 35.2                | 73.4                               | 45.0                    | 58.7                                    | 24.8               | 75.1                       | 0.4                     | 64.9                                         | 1.7                       | 19.3                                            |
| Kenya 2008 DHS         | 9057  | 32.1                | 64.3                               | 50.0                    | 49.3                                    | 22.5               | -                          | 9.3                     | 58.4                                         | -                         | 34.4                                            |
| Kenya 2014 DHS         | 36430 | 38.2                | 64.5                               | 47.9                    | 49.0                                    | 19.9               | 84.9                       | 7.3                     | 57.6                                         | 2.5                       | 33.5                                            |
| Kenya 2015 MIS         | 6481  | 46.1                | 63.3                               | 54.5                    | 55.2                                    | 22.9               | -                          | -                       | 61.3                                         | -                         | -                                               |

**Table A.** Household-level characteristics of included surveys

| Survey              | N     | Urban residence (%) | Improved drinking water source (%) | Improved sanitation (%) | House built with finished materials (%) | Improved house (%) | No smoking inside home (%) | Modern cooking fuel (%) | Not crowded ( $\leq 3$ people / bedroom) (%) | IRS in past 12 months (%) | Household head attended secondary education (%) |
|---------------------|-------|---------------------|------------------------------------|-------------------------|-----------------------------------------|--------------------|----------------------------|-------------------------|----------------------------------------------|---------------------------|-------------------------------------------------|
| Lesotho 2009 DHS    | 9396  | 22.8                | 78.0                               | 33.9                    | 57.4                                    | 14.3               | -                          | 25.3                    | 45.3                                         | -                         | 23.3                                            |
| Lesotho 2014 DHS    | 9402  | 29.8                | 83.3                               | 67.2                    | 62.1                                    | 31.7               | 73.1                       | 32.2                    | 59.1                                         | -                         | 28.3                                            |
| Liberia 2011 MIS    | 4162  | 46.0                | 70.4                               | 28.1                    | 46.9                                    | 9.4                | -                          | 0.2                     | 47.7                                         | 10.7                      | -                                               |
| Liberia 2013 DHS    | 9333  | 37.0                | 64.9                               | 33.6                    | 37.9                                    | 10.2               | 83.0                       | 0.1                     | 59.9                                         | 10.1                      | 40.4                                            |
| Liberia 2016 MIS    | 4218  | 46.8                | 67.5                               | 36.9                    | 49.8                                    | 10.0               | -                          | 0.4                     | 54.4                                         | 0.8                       | -                                               |
| Madagascar 2008 DHS | 17857 | 25.2                | 43.8                               | 7.4                     | 29.8                                    | 3.7                | -                          | 1.1                     | 34.2                                         | -                         | 29.1                                            |
| Madagascar 2011 MIS | 8094  | 25.6                | 46.8                               | 15.1                    | 31.1                                    | 5.9                | -                          | 0.8                     | 34.7                                         | 46.1                      | -                                               |
| Madagascar 2013 MIS | 8574  | 25.6                | 45.3                               | 16.4                    | 29.0                                    | 6.1                | -                          | 0.9                     | 38.5                                         | 35.5                      | -                                               |
| Malawi 2010 DHS     | 24825 | 11.7                | 79.8                               | 11.3                    | 30.5                                    | 5.1                | -                          | 1.4                     | 58.2                                         | -                         | 19.9                                            |
| Malawi 2012 MIS     | 3404  | 31.0                | 82.6                               | 25.1                    | 41.2                                    | 12.2               | -                          | 4.1                     | 60.6                                         | 8.5                       | -                                               |
| Malawi 2014 MIS     | 3405  | 35.6                | 85.6                               | 19.8                    | 49.4                                    | 12.6               | -                          | 2.9                     | 64.2                                         | 6.0                       | -                                               |
| Malawi 2015 DHS     | 26361 | 18.9                | 87.0                               | 83.3                    | 46.6                                    | 29.6               | 83.7                       | 2.0                     | 64.5                                         | 6.1                       | 27.6                                            |
| Malawi 2017 MIS     | 3729  | 40.0                | 88.8                               | 27.0                    | 59.3                                    | 17.9               | -                          | 4.0                     | 66.1                                         | -                         | -                                               |
| Mali 2012 DHS       | 10107 | 27.4                | 67.9                               | 43.8                    | 31.4                                    | 17.0               | 79.5                       | 0.7                     | 68.2                                         | 8.4                       | 14.1                                            |
| Mali 2015 MIS       | 4240  | 25.4                | 70.5                               | 44.3                    | 39.8                                    | 18.6               | -                          | 0.5                     | 62.4                                         | 6.4                       | -                                               |
| Mozambique 2011 DHS | 13919 | 36.6                | 58.3                               | 22.9                    | 33.3                                    | 9.1                | 73.3                       | 5.4                     | 66.1                                         | 21.3                      | 17.2                                            |
| Mozambique 2015 AIS | 7169  | 43.1                | 67.6                               | 17.0                    | 42.7                                    | 11.0               | -                          | 5.5                     | 64.2                                         | 14.8                      | 21.9                                            |
| Namibia 2006 DHS    | 9200  | 42.3                | 88.1                               | 44.0                    | 60.4                                    | 30.8               | -                          | 36.2                    | 74.7                                         | -                         | 44.4                                            |
| Namibia 2013 DHS    | 9849  | 48.4                | 87.4                               | 47.9                    | 71.2                                    | 35.0               | 72.4                       | 41.6                    | 77.5                                         | 17.5                      | 53.9                                            |
| Niger 2012 DHS      | 10750 | 27.7                | 69.7                               | 27.4                    | 15.1                                    | 7.8                | -                          | 2.2                     | 44.3                                         | 1.0                       | 10.4                                            |
| Nigeria 2008 DHS    | 34070 | 31.5                | 52.6                               | 49.0                    | 61.0                                    | 18.3               | -                          | 1.5                     | 66.7                                         | -                         | 38.1                                            |
| Nigeria 2010 MIS    | 5895  | 33.0                | 55.6                               | 43.8                    | 62.4                                    | 16.3               | -                          | 1.3                     | 66.4                                         | 1.0                       | 39.0                                            |
| Nigeria 2013 DHS    | 38522 | 41.2                | 58.3                               | 52.6                    | 67.8                                    | 21.8               | 92.9                       | 3.0                     | 67.3                                         | 2.2                       | 42.7                                            |
| Nigeria 2015 MIS    | 7744  | 40.9                | 61.9                               | 51.5                    | 70.8                                    | 20.9               | -                          | 6.0                     | 63.6                                         | 1.8                       | 45.9                                            |
| Rwanda 2010 DHS     | 12540 | 16.0                | 74.2                               | 75.0                    | 49.6                                    | 25.1               | 77.7                       | 0.1                     | 69.3                                         | -                         | 11.7                                            |
| Rwanda 2015 DHS     | 12698 | 22.8                | 74.2                               | 71.7                    | 36.3                                    | 22.3               | 80.8                       | 0.5                     | 72.9                                         | -                         | 13.6                                            |
| Rwanda 2017 MIS     | 5041  | 23.3                | 76.9                               | 82.8                    | 42.5                                    | 28.5               | -                          | 2.3                     | 82.1                                         | 18.0                      | -                                               |

**Table A.** Household-level characteristics of included surveys

| Survey                | N     | Urban residence (%) | Improved drinking water source (%) | Improved sanitation (%) | House built with finished materials (%) | Improved house (%) | No smoking inside home (%) | Modern cooking fuel (%) | Not crowded ( $\leq 3$ people / bedroom) (%) | IRS in past 12 months (%) | Household head attended secondary education (%) |
|-----------------------|-------|---------------------|------------------------------------|-------------------------|-----------------------------------------|--------------------|----------------------------|-------------------------|----------------------------------------------|---------------------------|-------------------------------------------------|
| Senegal 2008 MIS      | 10651 | 31.0                | 65.4                               | 46.6                    | 52.2                                    | 21.2               | -                          | 17.2                    | 59.6                                         | -                         | -                                               |
| Senegal 2010 DHS      | 7904  | 37.5                | 69.5                               | 44.3                    | 59.3                                    | 23.0               | -                          | 17.4                    | 61.6                                         | 12.4                      | 11.5                                            |
| Senegal 2012 DHS      | 4177  | 39.2                | 66.9                               | 51.3                    | 63.4                                    | 24.3               | 58.4                       | 14.5                    | 59.3                                         | 15.5                      | 12.8                                            |
| Senegal 2014 DHS      | 4233  | 39.1                | 69.5                               | 49.1                    | 64.1                                    | 24.5               | 52.4                       | 12.3                    | 61.0                                         | 11.2                      | 11.5                                            |
| Senegal 2015 DHS      | 4511  | 38.9                | 65.5                               | 49.1                    | 69.4                                    | 25.9               | -                          | 12.4                    | 62.5                                         | 6.9                       | 12.0                                            |
| Senegal 2016 DHS      | 4440  | 39.0                | 72.0                               | 52.5                    | 68.6                                    | 26.1               | -                          | 15.2                    | 62.9                                         | 7.8                       | 12.5                                            |
| Sierra Leone 2008 DHS | 7284  | 40.6                | 55.2                               | 46.7                    | 41.6                                    | 15.4               | -                          | 0.1                     | 67.3                                         | -                         | 26.0                                            |
| Sierra Leone 2013 DHS | 12629 | 36.2                | 58.8                               | 50.0                    | 50.2                                    | 15.6               | 62.8                       | 0.1                     | 62.2                                         | 4.4                       | 24.6                                            |
| Sierra Leone 2016 MIS | 6719  | 29.5                | 62.2                               | 42.3                    | 52.2                                    | 16.6               | -                          | 0.5                     | 65.8                                         | 1.4                       | -                                               |
| Swaziland 2006 DHS    | 4843  | 38.8                | 71.5                               | 41.2                    | 86.6                                    | 29.2               | -                          | 37.9                    | 72.1                                         | -                         | 44.6                                            |
| Tanzania 2004 DHS     | 9735  | 22.2                | 52.6                               | 6.8                     | 34.8                                    | -                  | -                          | 0.4                     | -                                            | -                         | 10.9                                            |
| Tanzania 2010 DHS     | 9623  | 23.0                | 52.4                               | 25.5                    | 43.7                                    | 11.2               | -                          | 0.9                     | 65.5                                         | -                         | 14.0                                            |
| Tanzania 2012 AIS     | 10040 | 22.5                | 60.5                               | 37.1                    | 46.7                                    | 17.4               | -                          | 1.0                     | 67.0                                         | 23.3                      | 13.0                                            |
| Tanzania 2017 MIS     | 9330  | 28.3                | 61.1                               | 58.7                    | 56.5                                    | 23.7               | -                          | 3.1                     | 67.8                                         | -                         | -                                               |
| Togo 2013 DHS         | 9549  | 38.1                | 63.2                               | 38.3                    | 78.8                                    | 18.9               | 82.0                       | 6.1                     | 63.0                                         | -                         | 36.8                                            |
| Uganda 2006 DHS       | 8870  | 15.7                | 69.3                               | 27.1                    | 27.7                                    | 8.1                | -                          | 0.3                     | 46.0                                         | -                         | 22.7                                            |
| Uganda 2009 MIS       | 4421  | 14.9                | 72.7                               | 35.4                    | 34.3                                    | 12.3               | -                          | 1.2                     | 52.1                                         | -                         | -                                               |
| Uganda 2014 MIS       | 5345  | 20.9                | 77.1                               | 31.2                    | 38.5                                    | 12.6               | -                          | 0.7                     | 51.0                                         | 8.1                       | -                                               |
| Uganda 2016 DHS       | 19588 | 22.8                | 77.0                               | 34.4                    | 40.7                                    | 14.9               | 85.5                       | 0.9                     | 58.1                                         | -                         | 30.8                                            |
| Zambia 2007 DHS       | 7164  | 37.6                | 42.5                               | 33.0                    | 41.3                                    | 12.3               | -                          | 13.5                    | 46.9                                         | -                         | 37.9                                            |
| Zambia 2013 DHS       | 15920 | 43.7                | 62.1                               | 41.5                    | 51.2                                    | 18.0               | 81.4                       | 10.5                    | 53.5                                         | 34.6                      | 44.5                                            |
| Zimbabwe 2005 DHS     | 9285  | 32.9                | 77.3                               | 63.4                    | 67.2                                    | 35.9               | -                          | 31.7                    | 61.9                                         | -                         | 48.9                                            |
| Zimbabwe 2010 DHS     | 9756  | 34.1                | 78.5                               | 63.1                    | 71.2                                    | 35.7               | 76.6                       | 29.8                    | 64.1                                         | 19.7                      | 53.5                                            |
| Zimbabwe 2015 DHS     | 10534 | 41.2                | 81.6                               | 69.7                    | 79.6                                    | 43.0               | 82.1                       | 35.0                    | 68.5                                         | 21.8                      | 61.7                                            |

AIS: AIDS Indicator Survey; DHS: Demographic and Health Survey; DRC: Democratic Republic of the Congo; IRS: indoor residual spraying; MIS: Malaria Indicator Survey

**Table B.** Child-level characteristics of included surveys

| Survey                 | N     | Mean age<br>in years | Male (%) | Slept<br>under<br>ITN<br>previous<br>night (%) | Low birth<br>weight<br>(<2500g)<br>(%) | Has health<br>card (%) | Received<br>vitamin A<br>(%) | Received<br>DPT-3 (%) | Received<br>measles-1<br>vaccine<br>(%) | Received<br>rotavirus-2<br>vaccine<br>(%) | Received<br>pneumococcal-<br>3 vaccine (%) |
|------------------------|-------|----------------------|----------|------------------------------------------------|----------------------------------------|------------------------|------------------------------|-----------------------|-----------------------------------------|-------------------------------------------|--------------------------------------------|
| Angola 2011 MIS        | 9681  | 2.4                  | 49.9     | 24.5                                           | -                                      | -                      | -                            | -                     | -                                       | -                                         | -                                          |
| Angola 2015 DHS        | 18311 | 2.5                  | 49.6     | 21.1                                           | 10.7                                   | 53.3                   | -                            | 30.1                  | 39.5                                    | 28.7                                      | 23.3                                       |
| Benin 2001 DHS         | 6250  | 2.5                  | 50.1     | -                                              | 13.0                                   | 85.4                   | 18.5                         | 61.5                  | 54.8                                    | -                                         | -                                          |
| Benin 2006 DHS         | 19444 | 2.5                  | 50.4     | 30.9                                           | 12.0                                   | 85.2                   | 61.0                         | 59.9                  | 53.9                                    | -                                         | -                                          |
| Benin 2012 DHS         | 17489 | 2.6                  | 51.0     | 69.8                                           | 12.3                                   | 86.5                   | 47.8                         | 59.1                  | 60.6                                    | -                                         | -                                          |
| Burkina Faso 2010 DHS  | 16969 | 2.4                  | 50.9     | 48.5                                           | 12.9                                   | 86.0                   | 61.4                         | 79.2                  | 71.6                                    | -                                         | -                                          |
| Burkina Faso 2014 MIS  | 8419  | 2.5                  | 50.9     | 75.2                                           | -                                      | -                      | -                            | -                     | -                                       | -                                         | -                                          |
| Burundi 2010 DHS       | 9025  | 2.4                  | 50.3     | 46.3                                           | 9.6                                    | 71.4                   | 78.1                         | 88.1                  | 80.3                                    | -                                         | -                                          |
| Burundi 2012 MIS       | 4985  | 2.4                  | 49.7     | 53.2                                           | -                                      | -                      | -                            | -                     | -                                       | -                                         | -                                          |
| Burundi 2016 DHS       | 15544 | 2.5                  | 50.3     | 38.7                                           | 8.9                                    | 80.0                   | 64.8                         | 86.2                  | 69.1                                    | 81.8                                      | 82.4                                       |
| Cameroon 2011 DHS      | 14276 | 2.4                  | 49.7     | 13.2                                           | 7.1                                    | 80.1                   | 70.1                         | 63.9                  | 62.0                                    | -                                         | -                                          |
| Comoros 2012 DHS       | 3933  | 2.4                  | 50.0     | 44.2                                           | 16.1                                   | 88.7                   | 47.1                         | 61.5                  | 61.9                                    | -                                         | -                                          |
| Congo 2005 DHS         | 5753  | 2.4                  | 50.3     | 6.3                                            | 11.3                                   | 78.7                   | 68.1                         | 62.9                  | 57.6                                    | -                                         | -                                          |
| Congo 2011 DHS         | 11145 | 2.4                  | 50.6     | 10.6                                           | 9.9                                    | 66.9                   | 61.7                         | 48.5                  | 58.2                                    | -                                         | -                                          |
| Cote d'Ivoire 2012 DHS | 9742  | 2.5                  | 50.0     | 37.4                                           | 13.5                                   | 91.2                   | 58.8                         | 56.9                  | 55.4                                    | -                                         | -                                          |
| DRC 2013 DHS           | 22059 | 2.4                  | 49.6     | 52.3                                           | 6.5                                    | 50.4                   | 61.8                         | 50.5                  | 59.6                                    | -                                         | -                                          |
| Eswatini 2006 DHS      | 3713  | 2.5                  | 49.4     | 0.8                                            | 7.0                                    | 97.9                   | 80.5                         | 84.8                  | 76.2                                    | -                                         | -                                          |
| Ethiopia 2016 DHS      | 12794 | 2.5                  | 51.1     | -                                              | 11.0                                   | 55.6                   | 44.8                         | 45.2                  | 41.1                                    | 46.4                                      | 41.3                                       |
| Gabon 2012 DHS         | 7446  | 2.3                  | 49.9     | 44.2                                           | 14.2                                   | 89.0                   | 60.5                         | 34.9                  | 61.6                                    | -                                         | -                                          |
| Gambia 2013 DHS        | 10701 | 2.4                  | 50.9     | 45.3                                           | 10.9                                   | 96.1                   | 63.6                         | 77.2                  | 73.1                                    | -                                         | -                                          |
| Ghana 2008 DHS         | 7411  | 2.5                  | 50.8     | 39.0                                           | 9.7                                    | 95.2                   | 68.2                         | 75.7                  | 72.5                                    | -                                         | -                                          |
| Ghana 2014 DHS         | 7341  | 2.4                  | 51.9     | 47.4                                           | 9.6                                    | 96.2                   | 59.3                         | 78.0                  | 73.9                                    | -                                         | -                                          |
| Ghana 2016 MIS         | 4159  | 2.5                  | 50.8     | 54.9                                           | -                                      | -                      | -                            | -                     | -                                       | -                                         | -                                          |
| Guinea 2012 DHS        | 8531  | 2.5                  | 51.4     | 27.1                                           | 8.2                                    | 76.8                   | 38.7                         | 44.4                  | 54.8                                    | -                                         | -                                          |
| Kenya 2008 DHS         | 7231  | 2.4                  | 51.4     | 52.2                                           | 5.7                                    | 88.6                   | 46.4                         | 72.4                  | 68.8                                    | -                                         | -                                          |
| Kenya 2014 DHS         | 26253 | 2.5                  | 50.6     | 52.4                                           | 7.2                                    | 89.6                   | 67.0                         | 81.5                  | 72.4                                    | -                                         | -                                          |
| Kenya 2015 MIS         | 4724  | 2.6                  | 50.3     | 56.1                                           | -                                      | -                      | -                            | -                     | -                                       | -                                         | -                                          |

**Table B.** Child-level characteristics of included surveys

| Survey              | N     | Mean age<br>in years | Male (%) | Slept<br>under<br>ITN<br>previous<br>night (%) | Low birth<br>weight<br>(<2500g)<br>(%) | Has health<br>card (%) | Received<br>vitamin A<br>(%) | Received<br>DPT-3 (%) | Received<br>measles-1<br>vaccine<br>(%) | Received<br>rotavirus-2<br>vaccine<br>(%) | Received<br>pneumococcal-<br>3 vaccine (%) |
|---------------------|-------|----------------------|----------|------------------------------------------------|----------------------------------------|------------------------|------------------------------|-----------------------|-----------------------------------------|-------------------------------------------|--------------------------------------------|
| Lesotho 2009 DHS    | 5987  | 2.5                  | 49.4     | -                                              | 8.9                                    | 92.3                   | 58.0                         | 72.8                  | 67.8                                    | -                                         | -                                          |
| Lesotho 2014 DHS    | 5181  | 2.6                  | 49.8     | -                                              | 10.2                                   | 97.9                   | 53.6                         | 79.0                  | 74.2                                    | -                                         | -                                          |
| Liberia 2011 MIS    | 4340  | 2.5                  | 50.2     | 36.5                                           | -                                      | -                      | -                            | -                     | -                                       | -                                         | -                                          |
| Liberia 2013 DHS    | 9724  | 2.5                  | 51.2     | 36.8                                           | 10.3                                   | 83.4                   | 53.2                         | 55.1                  | 58.0                                    | -                                         | -                                          |
| Liberia 2016 MIS    | 3926  | 2.5                  | 49.9     | 42.3                                           | -                                      | 77.4                   | -                            | -                     | 50.3                                    | 25.3                                      | 54.0                                       |
| Madagascar 2008 DHS | 15763 | 2.5                  | 50.6     | 46.4                                           | 11.9                                   | 78.9                   | 88.6                         | 65.3                  | 59.9                                    | -                                         | -                                          |
| Madagascar 2011 MIS | 8109  | 2.5                  | 50.9     | 74.7                                           | -                                      | -                      | -                            | -                     | -                                       | -                                         | -                                          |
| Madagascar 2013 MIS | 7306  | 2.5                  | 51.0     | 53.8                                           | -                                      | -                      | -                            | -                     | -                                       | -                                         | -                                          |
| Malawi 2010 DHS     | 24280 | 2.5                  | 49.4     | 42.8                                           | 10.8                                   | 86.1                   | 82.2                         | 85.3                  | 78.8                                    | -                                         | -                                          |
| Malawi 2012 MIS     | 2813  | 2.4                  | 47.5     | 57.2                                           | -                                      | -                      | -                            | -                     | -                                       | -                                         | -                                          |
| Malawi 2014 MIS     | 2621  | 2.4                  | 50.1     | 68.9                                           | -                                      | -                      | -                            | -                     | -                                       | -                                         | -                                          |
| Malawi 2015 DHS     | 21414 | 2.6                  | 49.9     | 43.8                                           | 11.8                                   | 84.4                   | 61.9                         | 82.1                  | 68.4                                    | 83.6                                      | 79.0                                       |
| Malawi 2017 MIS     | 2950  | 2.5                  | 49.2     | 66.6                                           | -                                      | -                      | -                            | -                     | -                                       | -                                         | -                                          |
| Mali 2012 DHS       | 12882 | 2.5                  | 50.9     | 68.2                                           | 15.0                                   | 78.9                   | 56.4                         | 55.1                  | 61.1                                    | -                                         | -                                          |
| Mali 2015 MIS       | 9539  | 2.5                  | 50.4     | 70.8                                           | -                                      | -                      | -                            | -                     | -                                       | -                                         | -                                          |
| Mozambique 2011 DHS | 12683 | 2.4                  | 49.9     | 33.1                                           | 12.8                                   | 85.6                   | 69.3                         | 72.6                  | 71.6                                    | -                                         | -                                          |
| Mozambique 2015 AIS | 6483  | 2.4                  | 49.3     | 48.3                                           | -                                      | 89.1                   | -                            | 74.0                  | 73.1                                    | -                                         | -                                          |
| Namibia 2006 DHS    | 6774  | 2.4                  | 49.8     | 10.9                                           | 12.9                                   | 93.8                   | 75.6                         | 77.1                  | 69.7                                    | -                                         | -                                          |
| Namibia 2013 DHS    | 6953  | 2.5                  | 49.5     | 6.1                                            | 12.1                                   | 94.6                   | 82.0                         | 77.5                  | 73.5                                    | -                                         | -                                          |
| Niger 2012 DHS      | 15291 | 2.5                  | 50.4     | 22.7                                           | 10.4                                   | 78.8                   | 58.0                         | 59.1                  | 59.4                                    | -                                         | -                                          |
| Nigeria 2008 DHS    | 31634 | 2.4                  | 50.9     | 6.1                                            | 8.0                                    | 41.4                   | 70.3                         | 30.1                  | 36.0                                    | -                                         | -                                          |
| Nigeria 2010 MIS    | 6941  | 2.4                  | 50.9     | 29.8                                           | -                                      | -                      | -                            | -                     | -                                       | -                                         | -                                          |
| Nigeria 2013 DHS    | 35364 | 2.4                  | 50.7     | 18.2                                           | 7.0                                    | 49.2                   | 40.1                         | 36.7                  | 38.0                                    | -                                         | -                                          |
| Nigeria 2015 MIS    | 8290  | 2.5                  | 50.4     | 41.3                                           | -                                      | -                      | -                            | -                     | -                                       | -                                         | -                                          |
| Rwanda 2010 DHS     | 10697 | 2.6                  | 50.8     | 67.8                                           | 5.8                                    | 83.9                   | 87.2                         | 91.2                  | 81.6                                    | -                                         | -                                          |
| Rwanda 2015 DHS     | 9505  | 2.5                  | 50.5     | 65.9                                           | 5.8                                    | 93.5                   | 79.8                         | 91.8                  | 30.9                                    | 61.7                                      | -                                          |
| Rwanda 2017 MIS     | 3548  | 2.4                  | 52.0     | 68.5                                           | -                                      | -                      | -                            | -                     | -                                       | -                                         | -                                          |

**Table B.** Child-level characteristics of included surveys

| Survey                | N     | Mean age<br>in years | Male (%) | Slept<br>under<br>ITN<br>previous<br>night (%) | Low birth<br>weight<br>(<2500g)<br>(%) | Has health<br>card (%) | Received<br>vitamin A<br>(%) | Received<br>DPT-3 (%) | Received<br>measles-1<br>vaccine<br>(%) | Received<br>rotavirus-2<br>vaccine<br>(%) | Received<br>pneumococcal-<br>3 vaccine (%) |
|-----------------------|-------|----------------------|----------|------------------------------------------------|----------------------------------------|------------------------|------------------------------|-----------------------|-----------------------------------------|-------------------------------------------|--------------------------------------------|
| Senegal 2008 MIS      | 23105 | 2.5                  | 51.1     | 32.1                                           | -                                      | -                      | -                            | -                     | -                                       | -                                         | -                                          |
| Senegal 2010 DHS      | 15752 | 2.5                  | 51.4     | 44.0                                           | 14.4                                   | 90.3                   | 74.2                         | 73.4                  | 71.1                                    | -                                         | -                                          |
| Senegal 2012 DHS      | 8746  | 2.5                  | 50.0     | 48.6                                           | 13.3                                   | 88.1                   | 77.3                         | 79.4                  | 68.0                                    | -                                         | -                                          |
| Senegal 2014 DHS      | 8432  | 2.4                  | 50.2     | 49.2                                           | 13.3                                   | 92.3                   | 83.5                         | 79.9                  | 68.7                                    | -                                         | -                                          |
| Senegal 2015 DHS      | 8553  | 2.4                  | 49.9     | 56.3                                           | 12.1                                   | 93.7                   | 83.8                         | 79.7                  | 66.5                                    | -                                         | -                                          |
| Senegal 2016 DHS      | 8380  | 2.5                  | 51.2     | 67.4                                           | 11.3                                   | 90.9                   | 73.2                         | 79.9                  | 66.4                                    | -                                         | -                                          |
| Sierra Leone 2008 DHS | 7426  | 2.4                  | 50.1     | 27.3                                           | 10.8                                   | 83.4                   | 47.4                         | 51.6                  | 51.4                                    | -                                         | -                                          |
| Sierra Leone 2013 DHS | 14958 | 2.6                  | 49.5     | 49.8                                           | 6.1                                    | 89.7                   | 80.2                         | 68.5                  | 70.7                                    | -                                         | -                                          |
| Sierra Leone 2016 MIS | 8460  | 2.5                  | 50.4     | 44.3                                           | -                                      | -                      | -                            | -                     | -                                       | -                                         | -                                          |
| Tanzania 2004 DHS     | 10142 | 2.4                  | 50.2     | 17.8                                           | 7.3                                    | 87.9                   | 38.0                         | 40.0                  | 67.1                                    | -                                         | -                                          |
| Tanzania 2010 DHS     | 10107 | 2.5                  | 49.5     | 61.3                                           | 6.1                                    | 92.2                   | 59.1                         | 80.7                  | 71.1                                    | -                                         | -                                          |
| Tanzania 2012 AIS     | 10921 | 2.4                  | 50.2     | 68.9                                           | -                                      | -                      | -                            | -                     | -                                       | -                                         | -                                          |
| Tanzania 2017 MIS     | 9623  | 2.5                  | 50.5     | 52.3                                           | -                                      | -                      | -                            | -                     | -                                       | -                                         | -                                          |
| Togo 2013 DHS         | 8583  | 2.5                  | 50.4     | 43.4                                           | 9.3                                    | 91.2                   | 81.5                         | 76.2                  | 66.5                                    | -                                         | -                                          |
| Uganda 2006 DHS       | 10064 | 2.5                  | 49.1     | 11.9                                           | 10.0                                   | 80.2                   | 54.2                         | 22.8                  | 62.7                                    | -                                         | -                                          |
| Uganda 2009 MIS       | 4940  | 2.5                  | 50.1     | 31.9                                           | -                                      | -                      | -                            | -                     | -                                       | -                                         | -                                          |
| Uganda 2014 MIS       | 6108  | 2.5                  | 49.0     | 73.6                                           | -                                      | -                      | -                            | -                     | -                                       | -                                         | -                                          |
| Uganda 2016 DHS       | 19453 | 2.6                  | 50.4     | 58.5                                           | 9.5                                    | 81.7                   | 57.4                         | 69.7                  | 59.4                                    | 4.8                                       | 58.1                                       |
| Zambia 2007 DHS       | 7404  | 2.3                  | 49.3     | 32.9                                           | 8.4                                    | 89.0                   | 77.0                         | 34.0                  | 70.9                                    | -                                         | -                                          |
| Zambia 2013 DHS       | 16657 | 2.5                  | 50.6     | 40.0                                           | 8.3                                    | 87.8                   | 68.6                         | 80.4                  | 74.0                                    | -                                         | -                                          |
| Zimbabwe 2005 DHS     | 7284  | 2.6                  | 50.4     | 3.1                                            | 9.4                                    | 90.5                   | 45.9                         | 52.7                  | 52.2                                    | -                                         | -                                          |
| Zimbabwe 2010 DHS     | 7187  | 2.4                  | 50.2     | 10.6                                           | 8.4                                    | 87.8                   | 58.7                         | 65.4                  | 65.1                                    | -                                         | -                                          |
| Zimbabwe 2015 DHS     | 8082  | 2.6                  | 49.6     | 9.2                                            | 9.4                                    | 88.5                   | 61.1                         | 75.1                  | 61.0                                    | 42.7                                      | 72.7                                       |

AIS: AIDS Indicator Survey; DHS: Demographic and Health Survey; DRC: Democratic Republic of the Congo; DPT: diphtheria-pertussis-tetanus; ITN: insecticide-treated net; MIS: Malaria Indicator Survey.

**Table C.** Prevalence of health outcomes by survey

| Survey                 | N     | Malaria positive by microscopy, % (n) | Malaria positive by RDT, % (n) | Diarrhoea in past two weeks, % (n) | Cough with short and rapid breathing in past two weeks, % (n) | Low height-for-age, % (n) | Low weight-for-height, % (n) | Low weight-for-age, % (n) | Any anaemia, % (n) | Moderate to severe anaemia, % (n) |
|------------------------|-------|---------------------------------------|--------------------------------|------------------------------------|---------------------------------------------------------------|---------------------------|------------------------------|---------------------------|--------------------|-----------------------------------|
| Angola 2011 MIS        | 9681  | 9.8 (3431)                            | 12.6 (3432)                    | -                                  | -                                                             | -                         | -                            | -                         | 52.8 (3418)        | 26.4 (3418)                       |
| Angola 2015 DHS        | 18311 | -                                     | 17.2 (8317)                    | 14.2 (12746)                       | 4.6 (12743)                                                   | 31.6 (7453)               | 4.5 (7587)                   | 23.0 (7453)               | 64.1 (6854)        | 34.3 (6854)                       |
| Benin 2001 DHS         | 6250  | -                                     | -                              | 14.1 (4559)                        | 48.6 (1167)                                                   | 31.1 (4085)               | 7.3 (4865)                   | 23.1 (4085)               | 79.2 (2568)        | 57.6 (2568)                       |
| Benin 2006 DHS         | 19444 | -                                     | -                              | 9.7 (14184)                        | 48.2 (2853)                                                   | 38.2 (13221)              | 7.4 (13677)                  | 23.0 (13221)              | 76.4 (4823)        | 52.1 (4823)                       |
| Benin 2012 DHS         | 17489 | 30.5 (4638)                           | 27.6 (4695)                    | 6.6 (12035)                        | 42.9 (944)                                                    | 41.6 (8423)               | 14.7 (10486)                 | 27.2 (8423)               | 58.3 (3784)        | 31.8 (3784)                       |
| Burkina Faso 2010 DHS  | 16969 | 65.0 (6102)                           | 75.6 (6125)                    | 15.1 (13422)                       | 43.2 (1398)                                                   | 29.5 (6878)               | 13.3 (6891)                  | 29.6 (6878)               | 88.2 (6286)        | 69.6 (6286)                       |
| Burkina Faso 2014 MIS  | 8419  | 47.7 (6117)                           | 64.4 (6154)                    | -                                  | -                                                             | -                         | -                            | -                         | 86.5 (6155)        | 69.7 (6155)                       |
| Burundi 2010 DHS       | 9025  | -                                     | -                              | 25.0 (7111)                        | 79.9 (2630)                                                   | 48.5 (3624)               | 5.2 (3634)                   | 32.6 (3624)               | 43.3 (3265)        | 20.2 (3265)                       |
| Burundi 2012 MIS       | 4985  | 16.1 (3722)                           | 20.6 (3750)                    | -                                  | -                                                             | -                         | -                            | -                         | 48.9 (3754)        | 25.6 (3754)                       |
| Burundi 2016 DHS       | 15544 | 25.7 (6924)                           | 35.7 (6913)                    | 21.6 (12274)                       | 12.5 (12272)                                                  | 47.5 (6355)               | 4.0 (6358)                   | 34.9 (6355)               | 59.1 (5767)        | 34.1 (5767)                       |
| Cameroon 2011 DHS      | 14276 | -                                     | 33.5 (6605)                    | 20.5 (9981)                        | 45.6 (3564)                                                   | 27.8 (5923)               | 4.4 (6001)                   | 16.9 (5923)               | 61.4 (5476)        | 34.3 (5476)                       |
| Comoros 2012 DHS       | 3933  | -                                     | -                              | 16.5 (2852)                        | 38.9 (504)                                                    | 24.7 (2705)               | 10.1 (2727)                  | 18.3 (2705)               | -                  | -                                 |
| Congo 2005 DHS         | 5753  | -                                     | -                              | 15.0 (4154)                        | 27.4 (1159)                                                   | 24.1 (4349)               | 6.7 (4417)                   | 13.3 (4349)               | 65.0 (2268)        | 36.1 (2268)                       |
| Congo 2011 DHS         | 11145 | -                                     | -                              | 17.9 (8403)                        | 33.7 (2357)                                                   | 23.1 (4979)               | 4.8 (4988)                   | 17.3 (4979)               | 66.0 (4457)        | 34.6 (4457)                       |
| Cote d'Ivoire 2012 DHS | 9742  | 17.7 (4044)                           | 46.5 (4215)                    | 18.7 (6606)                        | 42.6 (1410)                                                   | 24.0 (3781)               | 6.3 (3844)                   | 19.3 (3781)               | 74.8 (3403)        | 49.9 (3403)                       |
| DRC 2013 DHS           | 22059 | 26.3 (8186)                           | 36.0 (8219)                    | 16.8 (16532)                       | 39.8 (5219)                                                   | 39.1 (8962)               | 6.9 (8979)                   | 27.9 (8962)               | 62.8 (8266)        | 38.3 (8266)                       |
| Eswatini 2006 DHS      | 3713  | -                                     | -                              | 15.1 (2222)                        | 53.8 (651)                                                    | 23.8 (2784)               | 2.3 (2820)                   | 7.3 (2784)                | 41.6 (2540)        | 20.0 (2540)                       |
| Ethiopia 2016 DHS      | 12794 | -                                     | -                              | 11.1 (9682)                        | 8.1 (9695)                                                    | 31.4 (9463)               | 10.8 (9617)                  | 30.3 (9463)               | 59.9 (8525)        | 36.0 (8525)                       |
| Gabon 2012 DHS         | 7446  | -                                     | -                              | 18.6 (5144)                        | 41.8 (1984)                                                   | 19.9 (4107)               | 3.3 (4142)                   | 11.0 (4107)               | 62.9 (3849)        | 33.5 (3849)                       |
| Gambia 2013 DHS        | 10701 | 0.5 (3481)                            | 1.8 (3298)                     | 17.7 (7441)                        | 63.7 (1042)                                                   | 21.2 (3504)               | 10.0 (3556)                  | 23.1 (3504)               | 73.1 (3422)        | 48.8 (3422)                       |
| Ghana 2008 DHS         | 7411  | -                                     | -                              | 20.5 (2679)                        | 50.4 (593)                                                    | 23.6 (2665)               | 8.4 (2677)                   | 18.3 (2665)               | 80.0 (2467)        | 57.8 (2467)                       |
| Ghana 2014 DHS         | 7341  | 30.7 (3197)                           | 42.2 (3191)                    | 12.3 (5399)                        | 49.2 (738)                                                    | 14.7 (3069)               | 4.8 (3074)                   | 14.7 (3069)               | 68.6 (2736)        | 41.8 (2736)                       |
| Ghana 2016 MIS         | 4159  | 23.0 (3078)                           | 32.4 (3078)                    | -                                  | -                                                             | -                         | -                            | -                         | 65.7 (3078)        | 38.2 (3078)                       |
| Guinea 2012 DHS        | 8531  | 43.4 (3220)                           | 45.6 (3215)                    | 17.3 (6153)                        | 65.7 (1199)                                                   | 26.4 (3525)               | 9.7 (3531)                   | 22.0 (3525)               | 75.0 (3237)        | 51.2 (3237)                       |
| Kenya 2008 DHS         | 7231  | -                                     | -                              | 17.1 (5481)                        | 47.5 (1470)                                                   | 29.1 (5588)               | 7.1 (5634)                   | 20.8 (5588)               | -                  | -                                 |
| Kenya 2014 DHS         | 26253 | -                                     | -                              | 15.0 (19314)                       | 46.7 (6908)                                                   | 21.5 (20699)              | 5.2 (20793)                  | 17.4 (20699)              | -                  | -                                 |

**Table C.** Prevalence of health outcomes by survey

| Survey              | N     | Malaria positive by microscopy, % (n) | Malaria positive by RDT, % (n) | Diarrhoea in past two weeks, % (n) | Cough with short and rapid breathing in past two weeks, % (n) | Low height-for-age, % (n) | Low weight-for-height, % (n) | Low weight-for-age, % (n) | Any anaemia, % (n) | Moderate to severe anaemia, % (n) |
|---------------------|-------|---------------------------------------|--------------------------------|------------------------------------|---------------------------------------------------------------|---------------------------|------------------------------|---------------------------|--------------------|-----------------------------------|
| Kenya 2015 MIS      | 4724  | 5.9 (4105)                            | 10.0 (4095)                    | -                                  | -                                                             | -                         | -                            | -                         | 34.9 (4100)        | 16.0 (4100)                       |
| Lesotho 2009 DHS    | 5987  | -                                     | -                              | 12.1 (3306)                        | 44.3 (1012)                                                   | 33.1 (2254)               | 3.8 (2257)                   | 17.1 (2254)               | 49.2 (2084)        | 23.8 (2084)                       |
| Lesotho 2014 DHS    | 5181  | -                                     | -                              | 11.9 (2658)                        | 31.9 (753)                                                    | 27.9 (1924)               | 2.7 (1929)                   | 14.4 (1924)               | 51.0 (1766)        | 26.0 (1766)                       |
| Liberia 2011 MIS    | 4340  | 32.0 (3081)                           | 51.3 (3187)                    | -                                  | -                                                             | -                         | -                            | -                         | 74.5 (3207)        | 48.8 (3207)                       |
| Liberia 2013 DHS    | 9724  | -                                     | -                              | 25.2 (6429)                        | 46.5 (1885)                                                   | 27.7 (3877)               | 5.9 (3880)                   | 20.2 (3877)               | -                  | -                                 |
| Liberia 2016 MIS    | 3926  | -                                     | 50.5 (2788)                    | -                                  | -                                                             | -                         | -                            | -                         | 78.7 (2838)        | 52.0 (2838)                       |
| Madagascar 2008 DHS | 15763 | -                                     | -                              | 8.8 (11315)                        | 44.0 (1367)                                                   | 43.4 (5490)               | -                            | -                         | 51.0 (5408)        | 20.1 (5408)                       |
| Madagascar 2011 MIS | 8109  | 4.3 (6836)                            | 6.4 (6874)                     | -                                  | -                                                             | -                         | -                            | -                         | 50.7 (6238)        | 24.4 (6238)                       |
| Madagascar 2013 MIS | 7306  | 7.3 (6151)                            | 8.2 (6232)                     | -                                  | -                                                             | -                         | -                            | -                         | 49.2 (5430)        | 24.1 (5430)                       |
| Malawi 2010 DHS     | 24280 | -                                     | -                              | 17.2 (17894)                       | 53.9 (5152)                                                   | 40.6 (4927)               | 3.7 (4935)                   | 17.4 (4927)               | 64.0 (4542)        | 40.1 (4542)                       |
| Malawi 2012 MIS     | 2813  | 24.8 (2112)                           | 38.4 (2115)                    | -                                  | -                                                             | -                         | -                            | -                         | 66.7 (2121)        | 41.0 (2121)                       |
| Malawi 2014 MIS     | 2621  | 26.6 (1928)                           | 30.1 (1921)                    | -                                  | -                                                             | -                         | -                            | -                         | 51.9 (1942)        | 26.4 (1942)                       |
| Malawi 2015 DHS     | 21414 | -                                     | -                              | 21.1 (15802)                       | 10.3 (15792)                                                  | 28.6 (5677)               | 2.5 (5719)                   | 16.1 (5677)               | 62.6 (5276)        | 35.3 (5276)                       |
| Malawi 2017 MIS     | 2950  | 17.7 (2502)                           | 26.9 (2504)                    | -                                  | -                                                             | -                         | -                            | -                         | 58.1 (2313)        | 32.7 (2313)                       |
| Mali 2012 DHS       | 12882 | 50.2 (5646)                           | 45.0 (5706)                    | 9.0 (9130)                         | 44.5 (703)                                                    | 33.0 (4861)               | 11.6 (4888)                  | 30.3 (4861)               | 80.7 (4742)        | 59.4 (4742)                       |
| Mali 2015 MIS       | 9539  | 34.7 (7347)                           | 31.4 (7302)                    | -                                  | -                                                             | -                         | -                            | -                         | 85.2 (7300)        | 63.4 (7300)                       |
| Mozambique 2011 DHS | 12683 | 29.9 (4898)                           | 33.9 (4916)                    | 10.7 (9813)                        | 46.0 (1055)                                                   | 33.7 (10302)              | 4.2 (10413)                  | 17.0 (10302)              | 65.4 (4923)        | 39.1 (4923)                       |
| Mozambique 2015 AIS | 6483  | -                                     | 31.6 (4476)                    | 11.3 (4834)                        | 53.9 (1389)                                                   | -                         | -                            | -                         | 60.1 (4481)        | 33.6 (4481)                       |
| Namibia 2006 DHS    | 6774  | -                                     | -                              | 13.8 (3951)                        | 49.9 (720)                                                    | 24.4 (5156)               | 7.0 (5206)                   | 21.9 (5156)               | -                  | -                                 |
| Namibia 2013 DHS    | 6953  | -                                     | -                              | 19.5 (3850)                        | 43.7 (1265)                                                   | 19.4 (2589)               | 6.7 (2619)                   | 17.3 (2589)               | 48.8 (2342)        | 23.7 (2342)                       |
| Niger 2012 DHS      | 15291 | -                                     | -                              | 14.0 (11256)                       | 52.4 (1590)                                                   | 35.7 (5176)               | 15.8 (5224)                  | 40.7 (5176)               | 74.4 (4827)        | 48.2 (4827)                       |
| Nigeria 2008 DHS    | 31634 | -                                     | -                              | 10.8 (24174)                       | 40.9 (2850)                                                   | 38.3 (20862)              | 12.8 (20936)                 | 28.3 (20862)              | -                  | -                                 |
| Nigeria 2010 MIS    | 6941  | 38.1 (5137)                           | 47.2 (5147)                    | -                                  | -                                                             | -                         | -                            | -                         | 69.4 (5074)        | 45.2 (5074)                       |
| Nigeria 2013 DHS    | 35364 | -                                     | -                              | 10.6 (27463)                       | 41.5 (2737)                                                   | 32.3 (26424)              | 14.7 (26463)                 | 31.0 (26424)              | -                  | -                                 |
| Nigeria 2015 MIS    | 8290  | 27.2 (5753)                           | 43.6 (6025)                    | -                                  | -                                                             | -                         | -                            | -                         | 67.5 (6029)        | 42.1 (6029)                       |
| Rwanda 2010 DHS     | 10697 | 1.5 (4950)                            | 2.6 (4893)                     | 13.4 (8237)                        | 42.4 (1952)                                                   | 36.6 (4380)               | 2.5 (4396)                   | 15.3 (4380)               | 37.7 (4068)        | 13.6 (4068)                       |



**Table C.** Prevalence of health outcomes by survey

| Survey                | N     | Malaria positive by microscopy, % (n) | Malaria positive by RDT, % (n) | Diarrhoea in past two weeks, % (n) | Cough with short and rapid breathing in past two weeks, % (n) | Low height-for-age, % (n) | Low weight-for-height, % (n) | Low weight-for-age, % (n) | Any anaemia, % (n) | Moderate to severe anaemia, % (n) |
|-----------------------|-------|---------------------------------------|--------------------------------|------------------------------------|---------------------------------------------------------------|---------------------------|------------------------------|---------------------------|--------------------|-----------------------------------|
| Rwanda 2015 DHS       | 9505  | 2.3 (4338)                            | 7.8 (4230)                     | 12.3 (7321)                        | 43.7 (1980)                                                   | 32.0 (3811)               | 1.8 (3828)                   | 12.0 (3811)               | 35.8 (3531)        | 15.3 (3531)                       |
| Rwanda 2017 MIS       | 3548  | 7.2 (3207)                            | 11.4 (3154)                    | -                                  | -                                                             | -                         | -                            | -                         | -                  | -                                 |
| Senegal 2008 MIS      | 23105 | 6.7 (4138)                            | 12.0 (4032)                    | -                                  | -                                                             | -                         | -                            | -                         | 80.2 (4217)        | 57.7 (4217)                       |
| Senegal 2010 DHS      | 15752 | 4.0 (4698)                            | 3.4 (4716)                     | 19.6 (11045)                       | 60.4 (2064)                                                   | 24.9 (3953)               | 8.6 (4306)                   | 24.8 (3953)               | 77.6 (3887)        | 53.8 (3887)                       |
| Senegal 2012 DHS      | 8746  | 4.2 (7266)                            | 4.7 (7316)                     | 15.5 (6235)                        | 55.4 (726)                                                    | 16.6 (6497)               | 9.1 (6636)                   | 22.5 (6497)               | 71.5 (5793)        | 46.7 (5793)                       |
| Senegal 2014 DHS      | 8432  | 1.9 (6762)                            | 1.8 (6762)                     | 20.4 (6192)                        | 46.7 (452)                                                    | 17.1 (6714)               | 6.4 (6807)                   | 19.6 (6714)               | 60.5 (6239)        | 34.5 (6239)                       |
| Senegal 2015 DHS      | 8553  | 0.5 (6883)                            | 1.1 (6895)                     | 21.5 (6285)                        | 50.0 (682)                                                    | 17.3 (6818)               | 7.6 (6877)                   | 21.8 (6818)               | 70.2 (6241)        | 42.6 (6241)                       |
| Senegal 2016 DHS      | 8380  | 1.4 (6703)                            | 1.8 (6703)                     | 17.2 (6143)                        | 55.0 (584)                                                    | 14.7 (6637)               | 7.2 (6714)                   | 20.0 (6637)               | 68.5 (6083)        | 39.7 (6083)                       |
| Sierra Leone 2008 DHS | 7426  | -                                     | -                              | 12.2 (4520)                        | 50.1 (921)                                                    | 31.9 (2648)               | 9.4 (2680)                   | 24.2 (2648)               | 75.2 (2516)        | 46.6 (2516)                       |
| Sierra Leone 2013 DHS | 14958 | -                                     | -                              | 12.0 (9699)                        | 59.8 (1943)                                                   | 32.1 (5104)               | 7.9 (5143)                   | 20.4 (5104)               | 79.9 (5290)        | 53.6 (5290)                       |
| Sierra Leone 2016 MIS | 8460  | 43.4 (7677)                           | 57.7 (7666)                    | -                                  | -                                                             | -                         | -                            | -                         | 77.9 (6671)        | 52.1 (6671)                       |
| Tanzania 2004 DHS     | 10142 | -                                     | -                              | 13.6 (7430)                        | 32.0 (2065)                                                   | 36.7 (7975)               | 3.6 (8019)                   | 22.5 (7975)               | 70.7 (8124)        | 45.6 (8124)                       |
| Tanzania 2010 DHS     | 10107 | -                                     | -                              | 14.1 (7158)                        | 35.0 (1522)                                                   | 34.0 (7605)               | 5.5 (7611)                   | 22.1 (7605)               | 52.6 (7788)        | 28.0 (7788)                       |
| Tanzania 2012 AIS     | 10921 | 4.7 (7555)                            | 9.9 (7695)                     | -                                  | -                                                             | -                         | -                            | -                         | 56.7 (7793)        | 29.0 (7793)                       |
| Tanzania 2017 MIS     | 9623  | -                                     | 8.4 (7249)                     | -                                  | -                                                             | -                         | -                            | -                         | 61.2 (7262)        | 32.6 (7262)                       |
| Togo 2013 DHS         | 8583  | 39.5 (3888)                           | 41.2 (3868)                    | 16.3 (6365)                        | 54.2 (1687)                                                   | 23.5 (3531)               | 6.3 (3541)                   | 21.3 (3531)               | 70.3 (3240)        | 44.6 (3240)                       |
| Uganda 2006 DHS       | 10064 | -                                     | -                              | 27.0 (7134)                        | 53.0 (3212)                                                   | 33.0 (2670)               | 5.4 (2715)                   | 21.5 (2670)               | 72.8 (2445)        | 50.4 (2445)                       |
| Uganda 2009 MIS       | 4940  | 43.6 (4011)                           | 53.1 (3998)                    | -                                  | -                                                             | -                         | -                            | -                         | 62.9 (3972)        | 41.7 (3972)                       |
| Uganda 2014 MIS       | 6108  | 19.7 (4939)                           | 32.8 (4903)                    | -                                  | -                                                             | -                         | -                            | -                         | 53.2 (4946)        | 29.2 (4946)                       |
| Uganda 2016 DHS       | 19453 | -                                     | 33.7 (5500)                    | 21.0 (13484)                       | 15.4 (13486)                                                  | 23.5 (5180)               | 3.2 (5266)                   | 13.6 (5180)               | 53.6 (4806)        | 29.7 (4806)                       |
| Zambia 2007 DHS       | 7404  | -                                     | -                              | 16.0 (5606)                        | 36.7 (1424)                                                   | 38.2 (5639)               | 5.2 (5647)                   | 19.2 (5639)               | -                  | -                                 |
| Zambia 2013 DHS       | 16657 | -                                     | -                              | 16.5 (12273)                       | 30.3 (2833)                                                   | 33.7 (12474)              | 5.5 (12495)                  | 19.7 (12474)              | -                  | -                                 |
| Zimbabwe 2005 DHS     | 7284  | -                                     | -                              | 13.1 (4538)                        | 54.9 (1005)                                                   | 29.0 (4979)               | 6.2 (5008)                   | 16.4 (4979)               | 57.7 (4436)        | 30.4 (4436)                       |
| Zimbabwe 2010 DHS     | 7187  | -                                     | -                              | 13.8 (4752)                        | 47.4 (1061)                                                   | 25.9 (5355)               | 2.9 (5414)                   | 13.6 (5355)               | 56.5 (4362)        | 29.6 (4362)                       |
| Zimbabwe 2015 DHS     | 8082  | -                                     | -                              | 16.9 (5244)                        | 8.1 (5240)                                                    | 20.4 (6142)               | 3.0 (6142)                   | 11.1 (6142)               | 36.5 (5326)        | 14.8 (5326)                       |

AIS: AIDS Indicator Survey; DHS: Demographic and Health Survey; DRC: Democratic Republic of the Congo; MIS: Malaria Indicator Survey; RDT: rapid diagnostic test.
