# Supplementary material for: Housing and child health in sub-Saharan Africa: A cross-sectional analysis
Source: PubMed Central journal article supplement (PMC7089421; doi:10.1371/journal.pmed.1003055), 2020-03-23
Supplement: pmed.1003055.s005.pdf [file pmed.1003055.s005.pdf]

**S5. Text. Association between housing conditions and health in children aged 0-5 years in sub-Saharan Africa****Table A.** Association between finished house construction materials and malaria, diarrhoea and acute respiratory infection in children aged 0-5 years in sub-Saharan Africa (adjusted results)

| Survey                 | Malaria positive by microscopy |        | Malaria positive by RDT |        | Diarrhoea in past two weeks |      | Cough with short and rapid breathing in past two weeks |      |
|------------------------|--------------------------------|--------|-------------------------|--------|-----------------------------|------|--------------------------------------------------------|------|
|                        | OR (95% CI)                    | p      | OR (95% CI)             | p      | OR (95% CI)                 | p    | OR (95% CI)                                            | p    |
| Angola 2011 MIS        | 1.14 (0.59, 2.21)              | 0.69   | 0.72 (0.38, 1.37)       | 0.31   | -                           | -    | -                                                      | -    |
| Angola 2015 DHS        | -                              | -      | 0.86 (0.65, 1.14)       | 0.30   | -                           | -    | -                                                      | -    |
| Benin 2001 DHS         | -                              | -      | -                       | -      | 1.10 (0.78, 1.55)           | 0.60 | -                                                      | -    |
| Benin 2006 DHS         | -                              | -      | -                       | -      | 1.03 (0.81, 1.31)           | 0.82 | 1.02 (0.70, 1.49)                                      | 0.91 |
| Benin 2012 DHS         | 0.78 (0.62, 0.98)              | 0.03   | 0.82 (0.65, 1.04)       | 0.11   | 1.03 (0.76, 1.39)           | 0.85 | -                                                      | -    |
| Burkina Faso 2010 DHS  | 1.04 (0.87, 1.24)              | 0.65   | 0.94 (0.77, 1.15)       | 0.56   | 0.94 (0.80, 1.12)           | 0.50 | -                                                      | -    |
| Burkina Faso 2014 MIS  | 0.94 (0.81, 1.09)              | 0.43   | 0.98 (0.83, 1.14)       | 0.77   | -                           | -    | -                                                      | -    |
| Burundi 2010 DHS       | -                              | -      | -                       | -      | 0.88 (0.72, 1.08)           | 0.22 | 1.00 (0.66, 1.50)                                      | 0.99 |
| Burundi 2012 MIS       | 0.73 (0.52, 1.03)              | 0.07   | 0.56 (0.40, 0.77)       | <0.001 | -                           | -    | -                                                      | -    |
| Burundi 2016 DHS       | 0.74 (0.63, 0.87)              | <0.001 | 0.72 (0.61, 0.85)       | <0.001 | 0.92 (0.79, 1.07)           | 0.26 | 1.04 (0.86, 1.26)                                      | 0.68 |
| Cameroon 2011 DHS      | -                              | -      | 0.93 (0.77, 1.13)       | 0.48   | 0.85 (0.63, 1.13)           | 0.26 | 1.51 (1.00, 2.29)                                      | 0.05 |
| Comoros 2012 DHS       | -                              | -      | -                       | -      | 1.74 (1.07, 2.81)           | 0.02 | 1.73 (0.40, 7.43)                                      | 0.46 |
| Congo 2005 DHS         | -                              | -      | -                       | -      | 0.81 (0.58, 1.13)           | 0.21 | 1.38 (0.74, 2.58)                                      | 0.32 |
| Congo 2011 DHS         | -                              | -      | -                       | -      | 1.06 (0.86, 1.30)           | 0.60 | 0.84 (0.58, 1.22)                                      | 0.37 |
| DRC 2013 DHS           | 0.79 (0.61, 1.01)              | 0.06   | 0.79 (0.62, 1.01)       | 0.06   | 1.20 (0.98, 1.46)           | 0.07 | 0.87 (0.65, 1.16)                                      | 0.35 |
| Cote d'Ivoire 2012 DHS | 0.80 (0.63, 1.02)              | 0.07   | 0.88 (0.71, 1.09)       | 0.23   | 0.76 (0.56, 1.02)           | 0.06 | 0.67 (0.33, 1.38)                                      | 0.28 |
| Eswatini 2006 DHS      | -                              | -      | -                       | -      | 0.72 (0.45, 1.14)           | 0.16 | 0.73 (0.35, 1.52)                                      | 0.40 |
| Ethiopia 2016 DHS      | -                              | -      | -                       | -      | 1.16 (0.61, 2.19)           | 0.65 | 1.82 (0.74, 4.48)                                      | 0.19 |
| Gabon 2012 DHS         | -                              | -      | -                       | -      | 1.03 (0.79, 1.34)           | 0.82 | 0.83 (0.57, 1.21)                                      | 0.33 |
| Gambia 2013 DHS        | 1.06 (0.21, 5.30)              | 0.94   | 0.44 (0.17, 1.12)       | 0.08   | 1.02 (0.76, 1.36)           | 0.90 | -                                                      | -    |
| Ghana 2008 DHS         | -                              | -      | -                       | -      | 0.43 (0.11, 1.74)           | 0.24 | -                                                      | -    |
| Ghana 2014 DHS         | 0.84 (0.61, 1.15)              | 0.28   | 0.86 (0.61, 1.21)       | 0.37   | 1.14 (0.69, 1.87)           | 0.61 | 0.88 (0.17, 4.63)                                      | 0.88 |
| Ghana 2016 MIS         | 0.97 (0.69, 1.37)              | 0.88   | 0.89 (0.64, 1.23)       | 0.48   | -                           | -    | -                                                      | -    |
| Guinea 2012 DHS        | 1.02 (0.80, 1.29)              | 0.88   | 0.93 (0.72, 1.19)       | 0.56   | 0.99 (0.66, 1.47)           | 0.96 | 0.89 (0.32, 2.51)                                      | 0.83 |
| Kenya 2008 DHS         | -                              | -      | -                       | -      | 0.69 (0.38, 1.25)           | 0.22 | 5.18 (0.85, 31.39)                                     | 0.07 |
| Kenya 2014 DHS         | -                              | -      | -                       | -      | 1.10 (0.82, 1.47)           | 0.54 | 1.06 (0.66, 1.68)                                      | 0.82 |
| Kenya 2015 MIS         | 0.98 (0.60, 1.58)              | 0.92   | 0.89 (0.59, 1.33)       | 0.57   | -                           | -    | -                                                      | -    |
| Lesotho 2009 DHS       | -                              | -      | -                       | -      | 1.32 (0.53, 3.30)           | 0.55 | -                                                      | -    |

**Table A.** Association between finished house construction materials and malaria, diarrhoea and acute respiratory infection in children aged 0-5 years in sub-Saharan Africa (adjusted results)

| Survey              | Malaria positive by microscopy |        | Malaria positive by RDT |        | Diarrhoea in past two weeks |      | Cough with short and rapid breathing in past two weeks |      |
|---------------------|--------------------------------|--------|-------------------------|--------|-----------------------------|------|--------------------------------------------------------|------|
|                     | OR (95% CI)                    | p      | OR (95% CI)             | p      | OR (95% CI)                 | p    | OR (95% CI)                                            | p    |
| Lesotho 2014 DHS    | -                              | -      | -                       | -      | 0.81 (0.51, 1.29)           | 0.38 | 0.77 (0.34, 1.72)                                      | 0.52 |
| Liberia 2011 MIS    | 0.96 (0.74, 1.24)              | 0.76   | 0.99 (0.77, 1.26)       | 0.91   | -                           | -    | -                                                      | -    |
| Liberia 2013 DHS    | -                              | -      | -                       | -      | 1.20 (0.80, 1.81)           | 0.37 | 1.71 (0.72, 4.06)                                      | 0.22 |
| Liberia 2016 MIS    | -                              | -      | 0.80 (0.62, 1.02)       | 0.08   | -                           | -    | -                                                      | -    |
| Madagascar 2008 DHS | -                              | -      | -                       | -      | 1.18 (0.71, 1.98)           | 0.52 | -                                                      | -    |
| Madagascar 2011 MIS | 0.48 (0.20, 1.17)              | 0.10   | 0.88 (0.50, 1.53)       | 0.64   | -                           | -    | -                                                      | -    |
| Madagascar 2013 MIS | 0.77 (0.40, 1.45)              | 0.41   | 1.05 (0.61, 1.81)       | 0.85   | -                           | -    | -                                                      | -    |
| Malawi 2010 DHS     | -                              | -      | -                       | -      | 1.09 (0.94, 1.25)           | 0.26 | 0.91 (0.74, 1.13)                                      | 0.39 |
| Malawi 2012 MIS     | 0.52 (0.37, 0.75)              | <0.001 | 0.56 (0.40, 0.78)       | <0.001 | -                           | -    | -                                                      | -    |
| Malawi 2014 MIS     | 0.94 (0.68, 1.29)              | 0.69   | 0.97 (0.71, 1.33)       | 0.86   | -                           | -    | -                                                      | -    |
| Malawi 2015 DHS     | -                              | -      | -                       | -      | 0.95 (0.83, 1.09)           | 0.44 | 0.88 (0.73, 1.06)                                      | 0.17 |
| Malawi 2017 MIS     | 0.85 (0.64, 1.14)              | 0.28   | 0.78 (0.60, 1.02)       | 0.07   | -                           | -    | -                                                      | -    |
| Mali 2012 DHS       | 0.79 (0.62, 1.01)              | 0.07   | 0.95 (0.73, 1.23)       | 0.69   | 1.30 (0.84, 2.04)           | 0.24 | -                                                      | -    |
| Mali 2015 MIS       | 0.82 (0.69, 0.98)              | 0.03   | 0.92 (0.76, 1.11)       | 0.37   | -                           | -    | -                                                      | -    |
| Mozambique 2011 DHS | 0.84 (0.62, 1.15)              | 0.28   | 0.75 (0.55, 1.01)       | 0.06   | 0.99 (0.73, 1.35)           | 0.96 | -                                                      | -    |
| Mozambique 2015 AIS | -                              | -      | 1.04 (0.77, 1.40)       | 0.82   | -                           | -    | -                                                      | -    |
| Namibia 2006 DHS    | -                              | -      | -                       | -      | 0.90 (0.48, 1.68)           | 0.74 | 1.00 (0.18, 5.61)                                      | 1.00 |
| Namibia 2013 DHS    | -                              | -      | -                       | -      | 0.85 (0.60, 1.20)           | 0.36 | 1.15 (0.68, 1.94)                                      | 0.60 |
| Niger 2012 DHS      | -                              | -      | -                       | -      | 1.02 (0.73, 1.42)           | 0.93 | 1.04 (0.54, 2.02)                                      | 0.90 |
| Nigeria 2008 DHS    | -                              | -      | -                       | -      | 0.60 (0.17, 2.12)           | 0.43 | -                                                      | -    |
| Nigeria 2010 MIS    | 1.07 (0.86, 1.34)              | 0.55   | 0.85 (0.68, 1.08)       | 0.18   | -                           | -    | -                                                      | -    |
| Nigeria 2013 DHS    | -                              | -      | -                       | -      | 0.68 (0.35, 1.32)           | 0.26 | -                                                      | -    |
| Nigeria 2015 MIS    | 0.93 (0.76, 1.15)              | 0.52   | 1.02 (0.84, 1.25)       | 0.81   | -                           | -    | -                                                      | -    |
| Rwanda 2010 DHS     | 0.80 (0.41, 1.58)              | 0.53   | 0.79 (0.47, 1.34)       | 0.38   | 1.12 (0.89, 1.41)           | 0.33 | 0.80 (0.54, 1.18)                                      | 0.26 |
| Rwanda 2015 DHS     | 0.72 (0.31, 1.66)              | 0.44   | 0.42 (0.26, 0.69)       | <0.001 | 1.04 (0.83, 1.32)           | 0.73 | 0.92 (0.66, 1.29)                                      | 0.64 |
| Rwanda 2017 MIS     | 0.71 (0.44, 1.14)              | 0.16   | 0.65 (0.43, 0.99)       | 0.04   | -                           | -    | -                                                      | -    |
| Senegal 2008 MIS    | 0.95 (0.59, 1.54)              | 0.84   | 1.35 (0.93, 1.96)       | 0.12   | -                           | -    | -                                                      | -    |
| Senegal 2010 DHS    | 1.42 (0.82, 2.46)              | 0.21   | 0.93 (0.52, 1.67)       | 0.82   | 1.07 (0.85, 1.35)           | 0.55 | 1.14 (0.66, 1.97)                                      | 0.64 |
| Senegal 2012 DHS    | 0.67 (0.44, 1.03)              | 0.07   | 0.74 (0.50, 1.09)       | 0.13   | 1.03 (0.73, 1.45)           | 0.86 | -                                                      | -    |
| Senegal 2014 DHS    | 0.89 (0.52, 1.53)              | 0.68   | 0.88 (0.51, 1.52)       | 0.65   | 0.69 (0.50, 0.96)           | 0.03 | -                                                      | -    |

**Table A.** Association between finished house construction materials and malaria, diarrhoea and acute respiratory infection in children aged 0-5 years in sub-Saharan Africa (adjusted results)

| Survey                | Malaria positive by microscopy |      | Malaria positive by RDT |        | Diarrhoea in past two weeks |      | Cough with short and rapid breathing in past two weeks |      |
|-----------------------|--------------------------------|------|-------------------------|--------|-----------------------------|------|--------------------------------------------------------|------|
|                       | OR (95% CI)                    | p    | OR (95% CI)             | p      | OR (95% CI)                 | p    | OR (95% CI)                                            | p    |
| Senegal 2015 DHS      | 1.43 (0.50, 4.09)              | 0.50 | 1.02 (0.56, 1.83)       | 0.96   | 0.81 (0.58, 1.13)           | 0.21 | -                                                      | -    |
| Senegal 2016 DHS      | 1.36 (0.74, 2.50)              | 0.33 | 1.47 (0.87, 2.49)       | 0.15   | 1.42 (0.99, 2.04)           | 0.06 | -                                                      | -    |
| Sierra Leone 2008 DHS | -                              | -    | -                       | -      | 0.64 (0.26, 1.55)           | 0.32 | -                                                      | -    |
| Sierra Leone 2013 DHS | -                              | -    | -                       | -      | 0.97 (0.75, 1.25)           | 0.79 | 0.78 (0.48, 1.27)                                      | 0.32 |
| Sierra Leone 2016 MIS | 0.98 (0.86, 1.12)              | 0.79 | 0.91 (0.79, 1.05)       | 0.18   | -                           | -    | -                                                      | -    |
| Tanzania 2004 DHS     | -                              | -    | -                       | -      | 1.20 (0.86, 1.67)           | 0.27 | -                                                      | -    |
| Tanzania 2010 DHS     | -                              | -    | -                       | -      | 1.07 (0.79, 1.45)           | 0.66 | 1.04 (0.59, 1.85)                                      | 0.88 |
| Tanzania 2012 AIS     | 0.67 (0.47, 0.95)              | 0.03 | 0.70 (0.53, 0.92)       | 0.01   | -                           | -    | -                                                      | -    |
| Tanzania 2017 MIS     | -                              | -    | 0.87 (0.67, 1.12)       | 0.28   | -                           | -    | -                                                      | -    |
| Togo 2013 DHS         | 1.13 (0.90, 1.40)              | 0.29 | 1.00 (0.80, 1.25)       | 0.99   | 1.25 (0.89, 1.76)           | 0.20 | 0.85 (0.46, 1.59)                                      | 0.62 |
| Uganda 2006 DHS       | -                              | -    | -                       | -      | 1.04 (0.63, 1.73)           | 0.88 | 0.78 (0.33, 1.85)                                      | 0.57 |
| Uganda 2009 MIS       | 0.72 (0.56, 0.91)              | 0.01 | 0.69 (0.55, 0.88)       | 0.002  | -                           | -    | -                                                      | -    |
| Uganda 2014 MIS       | 0.89 (0.69, 1.15)              | 0.37 | 0.80 (0.63, 1.02)       | 0.07   | -                           | -    | -                                                      | -    |
| Uganda 2016 DHS       | -                              | -    | 0.62 (0.49, 0.78)       | <0.001 | 1.23 (1.01, 1.51)           | 0.04 | 1.20 (0.94, 1.53)                                      | 0.13 |
| Zambia 2007 DHS       | -                              | -    | -                       | -      | 1.54 (0.84, 2.82)           | 0.16 | 0.83 (0.21, 3.38)                                      | 0.80 |
| Zambia 2013 DHS       | -                              | -    | -                       | -      | 1.06 (0.87, 1.29)           | 0.57 | 1.34 (0.91, 1.97)                                      | 0.14 |
| Zimbabwe 2005 DHS     | -                              | -    | -                       | -      | 1.03 (0.71, 1.49)           | 0.89 | 0.98 (0.49, 1.95)                                      | 0.95 |
| Zimbabwe 2010 DHS     | -                              | -    | -                       | -      | 0.94 (0.66, 1.36)           | 0.76 | 1.25 (0.68, 2.30)                                      | 0.48 |
| Zimbabwe 2015 DHS     | -                              | -    | -                       | -      | 1.02 (0.73, 1.43)           | 0.90 | 1.22 (0.77, 1.93)                                      | 0.41 |

AIS: AIDS Indicator Survey; CI: confidence intervals; DHS: Demographic and Health Survey; DRC: Democratic Republic of the Congo; MIS: Malaria Indicator Survey; OR: Odds Ratio; RDT: rapid diagnostic test. All p-values are calculated using the likelihood ratio test.

**Table B.** Association between finished house construction materials, growth failure and anaemia in children aged 0-5 years in sub-Saharan Africa (adjusted results)

| Survey                 | Low height-for-age |      | Low weight-for-height |      | Low weight-for-age |      | Any anaemia       |      | Moderate to severe anaemia |       |
|------------------------|--------------------|------|-----------------------|------|--------------------|------|-------------------|------|----------------------------|-------|
|                        | OR (95% CI)        | p    | OR (95% CI)           | p    | OR (95% CI)        | p    | OR (95% CI)       | p    | OR (95% CI)                | p     |
| Angola 2011 MIS        | -                  | -    | -                     | -    | -                  | -    | -                 | -    | -                          | -     |
| Angola 2015 DHS        | 1.14 (0.77, 1.68)  | 0.51 | 1.30 (0.54, 3.14)     | 0.56 | 0.95 (0.61, 1.48)  | 0.83 | -                 | -    | -                          | -     |
| Benin 2001 DHS         | -                  | -    | -                     | -    | -                  | -    | -                 | -    | -                          | -     |
| Benin 2006 DHS         | 0.84 (0.72, 0.97)  | 0.02 | 1.06 (0.79, 1.42)     | 0.70 | 0.78 (0.66, 0.93)  | 0.01 | 0.92 (0.63, 1.35) | 0.66 | 0.89 (0.64, 1.24)          | 0.50  |
| Benin 2012 DHS         | 0.84 (0.70, 1.01)  | 0.07 | 0.93 (0.73, 1.17)     | 0.52 | 0.88 (0.72, 1.08)  | 0.22 | 1.09 (0.73, 1.63) | 0.67 | 1.51 (1.01, 2.24)          | 0.04  |
| Burkina Faso 2010 DHS  | 1.04 (0.83, 1.29)  | 0.75 | 0.83 (0.63, 1.11)     | 0.22 | 1.01 (0.81, 1.26)  | 0.93 | 0.68 (0.49, 0.96) | 0.03 | 0.89 (0.71, 1.12)          | 0.33  |
| Burkina Faso 2014 MIS  | -                  | -    | -                     | -    | -                  | -    | -                 | -    | -                          | -     |
| Burundi 2010 DHS       | 0.78 (0.59, 1.04)  | 0.10 | 0.87 (0.45, 1.69)     | 0.68 | 0.70 (0.52, 0.96)  | 0.03 | 1.10 (0.81, 1.51) | 0.53 | 1.06 (0.72, 1.56)          | 0.76  |
| Burundi 2012 MIS       | -                  | -    | -                     | -    | -                  | -    | -                 | -    | -                          | -     |
| Burundi 2016 DHS       | 0.86 (0.68, 1.08)  | 0.19 | 1.40 (0.85, 2.31)     | 0.19 | 0.75 (0.59, 0.95)  | 0.01 | 0.75 (0.59, 0.97) | 0.03 | 0.69 (0.53, 0.89)          | 0.004 |
| Cameroon 2011 DHS      | 0.91 (0.65, 1.26)  | 0.56 | 0.97 (0.44, 2.16)     | 0.95 | 0.99 (0.63, 1.56)  | 0.96 | 1.27 (0.88, 1.83) | 0.20 | 0.83 (0.57, 1.21)          | 0.34  |
| Comoros 2012 DHS       | 0.65 (0.41, 1.01)  | 0.06 | 0.92 (0.49, 1.75)     | 0.80 | 0.81 (0.49, 1.33)  | 0.40 | -                 | -    | -                          | -     |
| Congo 2005 DHS         | 0.78 (0.59, 1.04)  | 0.09 | 1.15 (0.73, 1.80)     | 0.55 | 0.94 (0.68, 1.30)  | 0.70 | 1.16 (0.79, 1.68) | 0.45 | 0.82 (0.57, 1.17)          | 0.27  |
| Congo 2011 DHS         | 0.83 (0.63, 1.08)  | 0.16 | 0.89 (0.55, 1.47)     | 0.66 | 0.88 (0.66, 1.17)  | 0.37 | 0.98 (0.76, 1.26) | 0.86 | 1.20 (0.93, 1.55)          | 0.16  |
| DRC 2013 DHS           | 0.94 (0.73, 1.20)  | 0.61 | 1.07 (0.65, 1.75)     | 0.79 | 0.94 (0.71, 1.23)  | 0.65 | 1.03 (0.79, 1.34) | 0.82 | 1.05 (0.80, 1.36)          | 0.73  |
| Cote d'Ivoire 2012 DHS | 0.86 (0.54, 1.37)  | 0.52 | 0.99 (0.42, 2.28)     | 0.97 | 0.73 (0.45, 1.18)  | 0.20 | 0.99 (0.58, 1.67) | 0.96 | 1.11 (0.72, 1.71)          | 0.64  |
| Eswatini 2006 DHS      | 0.72 (0.47, 1.12)  | 0.15 | 1.75 (0.45, 6.81)     | 0.42 | 0.46 (0.22, 0.94)  | 0.03 | 1.16 (0.76, 1.77) | 0.49 | 1.38 (0.82, 2.31)          | 0.23  |
| Ethiopia 2016 DHS      | -                  | -    | -                     | -    | -                  | -    | -                 | -    | -                          | -     |
| Gabon 2012 DHS         | 0.99 (0.71, 1.39)  | 0.95 | 1.21 (0.51, 2.91)     | 0.66 | 1.17 (0.75, 1.83)  | 0.49 | 1.05 (0.76, 1.44) | 0.78 | 0.88 (0.65, 1.19)          | 0.41  |
| Gambia 2013 DHS        | 0.69 (0.44, 1.10)  | 0.12 | 0.80 (0.44, 1.49)     | 0.49 | 1.16 (0.74, 1.82)  | 0.51 | 0.75 (0.46, 1.23) | 0.25 | 0.91 (0.61, 1.38)          | 0.67  |
| Ghana 2008 DHS         | 0.90 (0.33, 2.44)  | 0.83 | 0.33 (0.07, 1.63)     | 0.17 | 0.56 (0.17, 1.84)  | 0.34 | 1.82 (0.34, 9.71) | 0.48 | 0.63 (0.17, 2.37)          | 0.49  |
| Ghana 2014 DHS         | 0.62 (0.29, 1.36)  | 0.23 | 1.26 (0.40, 3.92)     | 0.69 | 0.71 (0.35, 1.44)  | 0.34 | 1.11 (0.56, 2.20) | 0.77 | 0.84 (0.46, 1.54)          | 0.58  |
| Ghana 2016 MIS         | -                  | -    | -                     | -    | -                  | -    | -                 | -    | -                          | -     |
| Guinea 2012 DHS        | 1.37 (0.81, 2.32)  | 0.24 | 1.05 (0.51, 2.17)     | 0.89 | 1.52 (0.90, 2.55)  | 0.11 | 0.68 (0.39, 1.19) | 0.18 | 0.99 (0.63, 1.56)          | 0.98  |
| Kenya 2008 DHS         | 0.87 (0.61, 1.25)  | 0.44 | 0.71 (0.36, 1.40)     | 0.32 | 0.87 (0.58, 1.33)  | 0.53 | -                 | -    | -                          | -     |
| Kenya 2014 DHS         | 0.96 (0.72, 1.28)  | 0.80 | 1.32 (0.71, 2.46)     | 0.38 | 0.92 (0.66, 1.27)  | 0.61 | -                 | -    | -                          | -     |
| Kenya 2015 MIS         | -                  | -    | -                     | -    | -                  | -    | -                 | -    | -                          | -     |
| Lesotho 2009 DHS       | -                  | -    | -                     | -    | -                  | -    | -                 | -    | -                          | -     |
| Lesotho 2014 DHS       | -                  | -    | -                     | -    | -                  | -    | -                 | -    | -                          | -     |
| Liberia 2011 MIS       | -                  | -    | -                     | -    | -                  | -    | -                 | -    | -                          | -     |

**Table B.** Association between finished house construction materials, growth failure and anaemia in children aged 0-5 years in sub-Saharan Africa (adjusted results)

| Survey              | Low height-for-age |       | Low weight-for-height |      | Low weight-for-age |      | Any anaemia       |      | Moderate to severe anaemia |      |
|---------------------|--------------------|-------|-----------------------|------|--------------------|------|-------------------|------|----------------------------|------|
|                     | OR (95% CI)        | p     | OR (95% CI)           | p    | OR (95% CI)        | p    | OR (95% CI)       | p    | OR (95% CI)                | p    |
| Liberia 2013 DHS    | 0.51 (0.25, 1.06)  | 0.07  | 4.27 (0.99, 18.39)    | 0.05 | 0.87 (0.37, 2.05)  | 0.75 | -                 | -    | -                          | -    |
| Liberia 2016 MIS    | -                  | -     | -                     | -    | -                  | -    | -                 | -    | -                          | -    |
| Madagascar 2008 DHS | 0.75 (0.51, 1.13)  | 0.17  | -                     | -    | -                  | -    | 1.00 (0.53, 1.89) | 0.99 | 1.60 (0.63, 4.11)          | 0.33 |
| Madagascar 2011 MIS | -                  | -     | -                     | -    | -                  | -    | -                 | -    | -                          | -    |
| Madagascar 2013 MIS | -                  | -     | -                     | -    | -                  | -    | -                 | -    | -                          | -    |
| Malawi 2010 DHS     | 1.12 (0.86, 1.46)  | 0.39  | 0.36 (0.17, 0.76)     | 0.01 | 0.93 (0.65, 1.31)  | 0.66 | 0.93 (0.70, 1.24) | 0.63 | 0.86 (0.64, 1.14)          | 0.29 |
| Malawi 2012 MIS     | -                  | -     | -                     | -    | -                  | -    | -                 | -    | -                          | -    |
| Malawi 2014 MIS     | -                  | -     | -                     | -    | -                  | -    | -                 | -    | -                          | -    |
| Malawi 2015 DHS     | 0.67 (0.50, 0.90)  | 0.01  | 1.08 (0.50, 2.34)     | 0.85 | 1.04 (0.73, 1.47)  | 0.84 | 0.85 (0.62, 1.16) | 0.30 | 1.02 (0.77, 1.36)          | 0.88 |
| Malawi 2017 MIS     | -                  | -     | -                     | -    | -                  | -    | -                 | -    | -                          | -    |
| Mali 2012 DHS       | 1.27 (0.73, 2.21)  | 0.39  | 2.49 (0.90, 6.87)     | 0.08 | 1.24 (0.71, 2.17)  | 0.45 | 0.85 (0.47, 1.55) | 0.60 | 0.80 (0.48, 1.33)          | 0.39 |
| Mali 2015 MIS       | -                  | -     | -                     | -    | -                  | -    | -                 | -    | -                          | -    |
| Mozambique 2011 DHS | 0.98 (0.78, 1.23)  | 0.87  | 0.90 (0.51, 1.58)     | 0.71 | 0.94 (0.69, 1.28)  | 0.71 | 0.84 (0.60, 1.16) | 0.29 | 0.78 (0.55, 1.10)          | 0.15 |
| Mozambique 2015 AIS | -                  | -     | -                     | -    | -                  | -    | -                 | -    | -                          | -    |
| Namibia 2006 DHS    | 0.76 (0.50, 1.15)  | 0.19  | 1.26 (0.66, 2.39)     | 0.49 | 1.14 (0.75, 1.74)  | 0.53 | -                 | -    | -                          | -    |
| Namibia 2013 DHS    | 0.71 (0.37, 1.33)  | 0.28  | 0.77 (0.29, 2.04)     | 0.60 | 0.44 (0.22, 0.88)  | 0.02 | 1.14 (0.66, 1.96) | 0.63 | 1.06 (0.55, 2.05)          | 0.87 |
| Niger 2012 DHS      | 0.81 (0.48, 1.38)  | 0.44  | 0.51 (0.26, 0.98)     | 0.04 | 0.85 (0.51, 1.43)  | 0.55 | 0.98 (0.53, 1.82) | 0.96 | 1.30 (0.77, 2.18)          | 0.33 |
| Nigeria 2008 DHS    | 0.69 (0.37, 1.30)  | 0.25  | 0.81 (0.30, 2.14)     | 0.67 | 0.58 (0.30, 1.14)  | 0.11 | -                 | -    | -                          | -    |
| Nigeria 2010 MIS    | -                  | -     | -                     | -    | -                  | -    | -                 | -    | -                          | -    |
| Nigeria 2013 DHS    | 0.77 (0.45, 1.34)  | 0.36  | 0.97 (0.53, 1.77)     | 0.91 | 0.56 (0.34, 0.94)  | 0.03 | -                 | -    | -                          | -    |
| Nigeria 2015 MIS    | -                  | -     | -                     | -    | -                  | -    | -                 | -    | -                          | -    |
| Rwanda 2010 DHS     | 0.65 (0.50, 0.84)  | 0.001 | 0.62 (0.27, 1.42)     | 0.26 | 0.61 (0.43, 0.87)  | 0.01 | 0.80 (0.61, 1.04) | 0.10 | 0.67 (0.46, 0.98)          | 0.04 |
| Rwanda 2015 DHS     | 0.88 (0.67, 1.14)  | 0.33  | 0.28 (0.09, 0.86)     | 0.03 | 0.65 (0.44, 0.96)  | 0.03 | 1.00 (0.77, 1.30) | 1.00 | 0.78 (0.55, 1.13)          | 0.19 |
| Rwanda 2017 MIS     | -                  | -     | -                     | -    | -                  | -    | -                 | -    | -                          | -    |
| Senegal 2008 MIS    | -                  | -     | -                     | -    | -                  | -    | -                 | -    | -                          | -    |
| Senegal 2010 DHS    | 1.07 (0.68, 1.69)  | 0.76  | 1.71 (0.83, 3.53)     | 0.15 | 0.97 (0.60, 1.55)  | 0.88 | 1.08 (0.65, 1.80) | 0.77 | 1.07 (0.70, 1.64)          | 0.75 |
| Senegal 2012 DHS    | 1.26 (0.89, 1.80)  | 0.19  | 0.89 (0.56, 1.41)     | 0.62 | 0.80 (0.58, 1.09)  | 0.16 | 0.91 (0.66, 1.26) | 0.57 | 0.99 (0.74, 1.34)          | 0.97 |
| Senegal 2014 DHS    | 0.88 (0.61, 1.26)  | 0.48  | 0.88 (0.49, 1.57)     | 0.66 | 0.91 (0.64, 1.28)  | 0.58 | 1.31 (0.94, 1.81) | 0.11 | 1.27 (0.92, 1.75)          | 0.15 |
| Senegal 2015 DHS    | 0.78 (0.53, 1.14)  | 0.20  | 0.86 (0.51, 1.43)     | 0.56 | 0.93 (0.66, 1.31)  | 0.66 | 1.33 (0.93, 1.90) | 0.12 | 1.10 (0.80, 1.51)          | 0.56 |
| Senegal 2016 DHS    | 1.16 (0.76, 1.77)  | 0.50  | 1.55 (0.90, 2.66)     | 0.11 | 1.17 (0.81, 1.68)  | 0.40 | 0.80 (0.55, 1.16) | 0.24 | 0.75 (0.54, 1.03)          | 0.07 |

**Table B.** Association between finished house construction materials, growth failure and anaemia in children aged 0-5 years in sub-Saharan Africa (adjusted results)

| Survey                | Low height-for-age |      | Low weight-for-height |      | Low weight-for-age |      | Any anaemia       |      | Moderate to severe anaemia |       |
|-----------------------|--------------------|------|-----------------------|------|--------------------|------|-------------------|------|----------------------------|-------|
|                       | OR (95% CI)        | p    | OR (95% CI)           | p    | OR (95% CI)        | p    | OR (95% CI)       | p    | OR (95% CI)                | p     |
| Sierra Leone 2008 DHS | 0.55 (0.29, 1.03)  | 0.06 | 0.68 (0.18, 2.59)     | 0.57 | 0.68 (0.34, 1.37)  | 0.28 | 0.91 (0.23, 3.60) | 0.89 | 0.73 (0.21, 2.48)          | 0.61  |
| Sierra Leone 2013 DHS | 1.37 (0.99, 1.89)  | 0.06 | 0.66 (0.36, 1.19)     | 0.17 | 1.13 (0.79, 1.64)  | 0.50 | 0.96 (0.63, 1.46) | 0.83 | 1.14 (0.82, 1.59)          | 0.42  |
| Sierra Leone 2016 MIS | -                  | -    | -                     | -    | -                  | -    | -                 | -    | -                          | -     |
| Tanzania 2004 DHS     | 0.74 (0.57, 0.96)  | 0.02 | 0.73 (0.36, 1.49)     | 0.39 | 0.74 (0.55, 1.00)  | 0.05 | 0.76 (0.59, 0.98) | 0.03 | 0.68 (0.54, 0.87)          | 0.002 |
| Tanzania 2010 DHS     | 1.02 (0.80, 1.30)  | 0.86 | 1.14 (0.68, 1.92)     | 0.62 | 1.09 (0.82, 1.44)  | 0.57 | 1.20 (0.95, 1.52) | 0.13 | 1.20 (0.92, 1.55)          | 0.17  |
| Tanzania 2012 AIS     | -                  | -    | -                     | -    | -                  | -    | -                 | -    | -                          | -     |
| Tanzania 2017 MIS     | -                  | -    | -                     | -    | -                  | -    | -                 | -    | -                          | -     |
| Togo 2013 DHS         | 0.54 (0.34, 0.84)  | 0.01 | 0.48 (0.20, 1.15)     | 0.10 | 0.67 (0.42, 1.07)  | 0.09 | 0.94 (0.59, 1.48) | 0.78 | 0.81 (0.53, 1.25)          | 0.34  |
| Uganda 2006 DHS       | 0.86 (0.39, 1.87)  | 0.70 | 0.39 (0.08, 1.91)     | 0.25 | 0.67 (0.25, 1.79)  | 0.42 | 0.16 (0.03, 0.86) | 0.03 | 0.24 (0.07, 0.85)          | 0.03  |
| Uganda 2009 MIS       | -                  | -    | -                     | -    | -                  | -    | -                 | -    | -                          | -     |
| Uganda 2014 MIS       | -                  | -    | -                     | -    | -                  | -    | -                 | -    | -                          | -     |
| Uganda 2016 DHS       | 0.69 (0.38, 1.26)  | 0.23 | 1.74 (0.58, 5.27)     | 0.33 | 0.77 (0.41, 1.45)  | 0.42 | 0.69 (0.44, 1.10) | 0.12 | 0.65 (0.39, 1.07)          | 0.09  |
| Zambia 2007 DHS       | 0.86 (0.62, 1.18)  | 0.36 | 1.17 (0.63, 2.19)     | 0.62 | 0.75 (0.51, 1.11)  | 0.15 | -                 | -    | -                          | -     |
| Zambia 2013 DHS       | 0.97 (0.82, 1.14)  | 0.72 | 0.93 (0.67, 1.29)     | 0.66 | 0.80 (0.66, 0.98)  | 0.03 | -                 | -    | -                          | -     |
| Zimbabwe 2005 DHS     | 0.86 (0.63, 1.16)  | 0.31 | 1.48 (0.82, 2.66)     | 0.19 | 1.05 (0.72, 1.54)  | 0.78 | 1.07 (0.79, 1.44) | 0.66 | 1.21 (0.86, 1.69)          | 0.28  |
| Zimbabwe 2010 DHS     | 0.85 (0.64, 1.13)  | 0.27 | 0.69 (0.32, 1.52)     | 0.36 | 0.87 (0.61, 1.25)  | 0.46 | 0.89 (0.66, 1.19) | 0.42 | 0.97 (0.71, 1.33)          | 0.87  |
| Zimbabwe 2015 DHS     | 0.96 (0.67, 1.36)  | 0.81 | 1.10 (0.57, 2.11)     | 0.77 | 0.75 (0.48, 1.17)  | 0.20 | 0.92 (0.65, 1.29) | 0.61 | 1.47 (0.96, 2.26)          | 0.08  |

AIS: AIDS Indicator Survey; CI: confidence intervals; DHS: Demographic and Health Survey; DRC: Democratic Republic of the Congo; MIS: Malaria Indicator Survey; OR: Odds Ratio. All p-values are calculated using the likelihood ratio test.

**Table C.** Association between improved housing and malaria, diarrhoea and acute respiratory infection in children aged 0-5 years in sub-Saharan Africa (adjusted results)

| Survey                 | Malaria positive by microscopy |       | Malaria positive by RDT |       | Diarrhoea in past two weeks |       | Cough with short and rapid breathing in past two weeks |       |
|------------------------|--------------------------------|-------|-------------------------|-------|-----------------------------|-------|--------------------------------------------------------|-------|
|                        | OR (95% CI)                    | p     | OR (95% CI)             | p     | OR (95% CI)                 | p     | OR (95% CI)                                            | p     |
| Angola 2011 MIS        | 2.26 (0.82, 6.25)              | 0.12  | 0.17 (0.02, 1.40)       | 0.10  | -                           | -     | -                                                      | -     |
| Angola 2015 DHS        | -                              | -     | 0.72 (0.48, 1.09)       | 0.13  | -                           | -     | -                                                      | -     |
| Benin 2001 DHS         | -                              | -     | -                       | -     | -                           | -     | -                                                      | -     |
| Benin 2006 DHS         | -                              | -     | -                       | -     | 0.96 (0.64, 1.43)           | 0.85  | 1.45 (0.81, 2.58)                                      | 0.21  |
| Benin 2012 DHS         | 0.70 (0.45, 1.08)              | 0.11  | 0.68 (0.42, 1.11)       | 0.12  | 1.03 (0.68, 1.56)           | 0.89  | -                                                      | -     |
| Burkina Faso 2010 DHS  | 0.90 (0.69, 1.17)              | 0.42  | 1.03 (0.78, 1.34)       | 0.85  | 1.02 (0.83, 1.27)           | 0.83  | -                                                      | -     |
| Burkina Faso 2014 MIS  | 0.71 (0.56, 0.92)              | 0.008 | 0.72 (0.57, 0.91)       | 0.007 | -                           | -     | -                                                      | -     |
| Burundi 2010 DHS       | -                              | -     | -                       | -     | 0.93 (0.71, 1.23)           | 0.63  | 1.09 (0.65, 1.83)                                      | 0.74  |
| Burundi 2012 MIS       | 0.79 (0.51, 1.24)              | 0.31  | 0.61 (0.40, 0.93)       | 0.02  | -                           | -     | -                                                      | -     |
| Burundi 2016 DHS       | 1.09 (0.88, 1.35)              | 0.44  | 0.87 (0.71, 1.07)       | 0.18  | 1.03 (0.86, 1.23)           | 0.77  | 0.96 (0.77, 1.21)                                      | 0.75  |
| Cameroon 2011 DHS      | -                              | -     | 0.87 (0.71, 1.08)       | 0.21  | 0.70 (0.54, 0.92)           | 0.009 | 1.08 (0.76, 1.52)                                      | 0.67  |
| Comoros 2012 DHS       | -                              | -     | -                       | -     | 1.24 (0.79, 1.94)           | 0.34  | 12.91 (2.14, 77.75)                                    | 0.005 |
| Congo 2005 DHS         | -                              | -     | -                       | -     | 0.89 (0.55, 1.44)           | 0.63  | 0.87 (0.41, 1.83)                                      | 0.71  |
| Congo 2011 DHS         | -                              | -     | -                       | -     | 0.81 (0.60, 1.08)           | 0.15  | 1.44 (0.87, 2.37)                                      | 0.15  |
| DRC 2013 DHS           | 0.57 (0.34, 0.94)              | 0.03  | 0.70 (0.44, 1.11)       | 0.13  | 1.22 (0.92, 1.63)           | 0.17  | 0.92 (0.61, 1.40)                                      | 0.71  |
| Cote d'Ivoire 2012 DHS | 0.74 (0.50, 1.08)              | 0.11  | 0.77 (0.59, 1.00)       | 0.05  | 0.78 (0.60, 1.03)           | 0.08  | 0.58 (0.32, 1.04)                                      | 0.07  |
| Eswatini 2006 DHS      | -                              | -     | -                       | -     | 1.13 (0.60, 2.12)           | 0.70  | 1.25 (0.50, 3.07)                                      | 0.63  |
| Ethiopia 2016 DHS      | -                              | -     | -                       | -     | 0.56 (0.26, 1.22)           | 0.14  | 0.11 (0.01, 0.92)                                      | 0.04  |
| Gabon 2012 DHS         | -                              | -     | -                       | -     | 0.78 (0.60, 1.00)           | 0.05  | 1.28 (0.90, 1.81)                                      | 0.17  |
| Gambia 2013 DHS        | -                              | -     | 0.39 (0.13, 1.18)       | 0.10  | 1.06 (0.85, 1.31)           | 0.62  | -                                                      | -     |
| Ghana 2008 DHS         | -                              | -     | -                       | -     | 0.70 (0.26, 1.91)           | 0.49  | -                                                      | -     |
| Ghana 2014 DHS         | 0.84 (0.59, 1.20)              | 0.34  | 1.15 (0.81, 1.62)       | 0.44  | 0.96 (0.62, 1.47)           | 0.83  | 0.66 (0.16, 2.65)                                      | 0.55  |
| Ghana 2016 MIS         | 1.22 (0.84, 1.77)              | 0.30  | 0.78 (0.53, 1.14)       | 0.20  | -                           | -     | -                                                      | -     |
| Guinea 2012 DHS        | 1.19 (0.88, 1.60)              | 0.26  | 0.90 (0.66, 1.22)       | 0.50  | 0.89 (0.66, 1.19)           | 0.43  | 0.80 (0.41, 1.53)                                      | 0.50  |
| Kenya 2008 DHS         | -                              | -     | -                       | -     | 1.18 (0.60, 2.31)           | 0.64  | 0.66 (0.14, 3.05)                                      | 0.59  |
| Kenya 2014 DHS         | -                              | -     | -                       | -     | 0.70 (0.48, 1.02)           | 0.07  | 2.18 (1.21, 3.92)                                      | 0.009 |
| Kenya 2015 MIS         | -                              | -     | 0.32 (0.12, 0.86)       | 0.02  | -                           | -     | -                                                      | -     |
| Lesotho 2009 DHS       | -                              | -     | -                       | -     | 2.50 (0.63, 9.90)           | 0.19  | -                                                      | -     |
| Lesotho 2014 DHS       | -                              | -     | -                       | -     | 0.59 (0.35, 1.01)           | 0.05  | 0.83 (0.38, 1.83)                                      | 0.65  |
| Liberia 2011 MIS       | 1.30 (0.78, 2.16)              | 0.31  | 0.83 (0.52, 1.34)       | 0.45  | -                           | -     | -                                                      | -     |
| Liberia 2013 DHS       | -                              | -     | -                       | -     | 0.70 (0.38, 1.31)           | 0.26  | 0.34 (0.11, 1.07)                                      | 0.07  |
| Liberia 2016 MIS       | -                              | -     | 0.77 (0.52, 1.16)       | 0.21  | -                           | -     | -                                                      | -     |
| Madagascar 2008 DHS    | -                              | -     | -                       | -     | 0.62 (0.24, 1.64)           | 0.34  | -                                                      | -     |
| Madagascar 2011 MIS    | -                              | -     | -                       | -     | -                           | -     | -                                                      | -     |

**Table C.** Association between improved housing and malaria, diarrhoea and acute respiratory infection in children aged 0-5 years in sub-Saharan Africa (adjusted results)

| Survey                | Malaria positive by microscopy |      | Malaria positive by RDT |      | Diarrhoea in past two weeks |      | Cough with short and rapid breathing in past two weeks |      |
|-----------------------|--------------------------------|------|-------------------------|------|-----------------------------|------|--------------------------------------------------------|------|
|                       | OR (95% CI)                    | p    | OR (95% CI)             | p    | OR (95% CI)                 | p    | OR (95% CI)                                            | p    |
| Madagascar 2013 MIS   | 6.95 (1.12, 43.27)             | 0.04 | 4.12 (0.75, 22.71)      | 0.10 | -                           | -    | -                                                      | -    |
| Malawi 2010 DHS       | -                              | -    | -                       | -    | 1.06 (0.77, 1.47)           | 0.72 | 0.99 (0.59, 1.64)                                      | 0.95 |
| Malawi 2012 MIS       | 0.30 (0.10, 0.92)              | 0.04 | 0.35 (0.15, 0.85)       | 0.02 | -                           | -    | -                                                      | -    |
| Malawi 2014 MIS       | 1.01 (0.42, 2.39)              | 0.99 | 1.05 (0.46, 2.39)       | 0.91 | -                           | -    | -                                                      | -    |
| Malawi 2015 DHS       | -                              | -    | -                       | -    | 0.91 (0.78, 1.07)           | 0.26 | 0.80 (0.65, 0.99)                                      | 0.04 |
| Malawi 2017 MIS       | 0.50 (0.23, 1.08)              | 0.08 | 0.63 (0.34, 1.16)       | 0.14 | -                           | -    | -                                                      | -    |
| Mali 2012 DHS         | 0.84 (0.61, 1.15)              | 0.27 | 0.99 (0.69, 1.41)       | 0.95 | 1.24 (0.88, 1.76)           | 0.22 | -                                                      | -    |
| Mali 2015 MIS         | 0.89 (0.71, 1.13)              | 0.34 | 0.73 (0.55, 0.97)       | 0.03 | -                           | -    | -                                                      | -    |
| Mozambique 2011 DHS   | 0.44 (0.24, 0.84)              | 0.01 | 0.58 (0.32, 1.05)       | 0.07 | 1.09 (0.77, 1.55)           | 0.62 | -                                                      | -    |
| Mozambique 2015 AIS   | -                              | -    | 0.92 (0.49, 1.73)       | 0.79 | -                           | -    | -                                                      | -    |
| Namibia 2006 DHS      | -                              | -    | -                       | -    | 0.92 (0.53, 1.59)           | 0.76 | 0.94 (0.16, 5.36)                                      | 0.94 |
| Namibia 2013 DHS      | -                              | -    | -                       | -    | 1.00 (0.70, 1.44)           | 0.98 | 0.58 (0.33, 1.02)                                      | 0.06 |
| Niger 2012 DHS        | -                              | -    | -                       | -    | 1.02 (0.72, 1.44)           | 0.93 | 1.33 (0.71, 2.50)                                      | 0.38 |
| Nigeria 2008 DHS      | -                              | -    | -                       | -    | 0.60 (0.27, 1.33)           | 0.21 | -                                                      | -    |
| Nigeria 2010 MIS      | 1.08 (0.82, 1.41)              | 0.59 | 0.73 (0.56, 0.96)       | 0.03 | -                           | -    | -                                                      | -    |
| Nigeria 2013 DHS      | -                              | -    | -                       | -    | 0.94 (0.67, 1.32)           | 0.70 | -                                                      | -    |
| Nigeria 2015 MIS      | 0.98 (0.73, 1.31)              | 0.88 | 0.90 (0.71, 1.14)       | 0.38 | -                           | -    | -                                                      | -    |
| Rwanda 2010 DHS       | 1.70 (0.68, 4.27)              | 0.26 | 1.46 (0.69, 3.09)       | 0.32 | 1.08 (0.83, 1.39)           | 0.57 | 0.85 (0.54, 1.34)                                      | 0.48 |
| Rwanda 2015 DHS       | 0.63 (0.13, 2.94)              | 0.55 | 0.57 (0.27, 1.21)       | 0.14 | 0.84 (0.62, 1.13)           | 0.26 | 0.78 (0.52, 1.17)                                      | 0.23 |
| Rwanda 2017 MIS       | 0.70 (0.39, 1.26)              | 0.23 | 0.58 (0.36, 0.93)       | 0.02 | -                           | -    | -                                                      | -    |
| Senegal 2008 MIS      | 0.80 (0.32, 1.99)              | 0.63 | 1.05 (0.65, 1.68)       | 0.85 | -                           | -    | -                                                      | -    |
| Senegal 2010 DHS      | 0.94 (0.45, 1.98)              | 0.87 | 0.88 (0.44, 1.79)       | 0.73 | 1.01 (0.83, 1.22)           | 0.96 | 1.02 (0.67, 1.55)                                      | 0.92 |
| Senegal 2012 DHS      | 1.62 (0.80, 3.29)              | 0.18 | 0.98 (0.52, 1.85)       | 0.95 | 0.81 (0.59, 1.12)           | 0.21 | -                                                      | -    |
| Senegal 2014 DHS      | 0.44 (0.08, 2.60)              | 0.37 | 1.19 (0.29, 4.83)       | 0.81 | 0.78 (0.59, 1.04)           | 0.09 | -                                                      | -    |
| Senegal 2015 DHS      | 0.41 (0.08, 2.13)              | 0.29 | 1.07 (0.20, 5.79)       | 0.94 | 1.00 (0.77, 1.32)           | 0.97 | -                                                      | -    |
| Senegal 2016 DHS      | 1.23 (0.30, 4.94)              | 0.77 | 1.56 (0.40, 6.16)       | 0.52 | 0.88 (0.65, 1.20)           | 0.43 | -                                                      | -    |
| Sierra Leone 2008 DHS | -                              | -    | -                       | -    | 0.86 (0.31, 2.37)           | 0.77 | -                                                      | -    |
| Sierra Leone 2013 DHS | -                              | -    | -                       | -    | 0.96 (0.69, 1.34)           | 0.82 | 1.01 (0.59, 1.72)                                      | 0.97 |
| Sierra Leone 2016 MIS | 1.03 (0.85, 1.23)              | 0.78 | 1.02 (0.85, 1.23)       | 0.83 | -                           | -    | -                                                      | -    |
| Tanzania 2004 DHS     | -                              | -    | -                       | -    | -                           | -    | -                                                      | -    |
| Tanzania 2010 DHS     | -                              | -    | -                       | -    | 1.04 (0.69, 1.57)           | 0.85 | 0.74 (0.32, 1.74)                                      | 0.49 |
| Tanzania 2012 AIS     | 0.70 (0.26, 1.90)              | 0.48 | 1.11 (0.56, 2.19)       | 0.76 | -                           | -    | -                                                      | -    |
| Tanzania 2017 MIS     | -                              | -    | 0.68 (0.39, 1.17)       | 0.16 | -                           | -    | -                                                      | -    |
| Togo 2013 DHS         | 0.63 (0.42, 0.94)              | 0.02 | 0.67 (0.45, 1.01)       | 0.05 | 0.91 (0.62, 1.34)           | 0.63 | 0.88 (0.52, 1.50)                                      | 0.64 |



**Table C.** Association between improved housing and malaria, diarrhoea and acute respiratory infection in children aged 0-5 years in sub-Saharan Africa (adjusted results)

| Survey            | Malaria positive by microscopy |      | Malaria positive by RDT |      | Diarrhoea in past two weeks |       | Cough with short and rapid breathing in past two weeks |      |
|-------------------|--------------------------------|------|-------------------------|------|-----------------------------|-------|--------------------------------------------------------|------|
|                   | OR (95% CI)                    | p    | OR (95% CI)             | p    | OR (95% CI)                 | p     | OR (95% CI)                                            | p    |
| Uganda 2006 DHS   | -                              | -    | -                       | -    | 0.79 (0.32, 1.96)           | 0.61  | 1.01 (0.23, 4.46)                                      | 0.99 |
| Uganda 2009 MIS   | 0.64 (0.41, 0.99)              | 0.04 | 0.64 (0.43, 0.96)       | 0.03 | -                           | -     | -                                                      | -    |
| Uganda 2014 MIS   | 0.77 (0.43, 1.38)              | 0.38 | 0.87 (0.54, 1.41)       | 0.58 | -                           | -     | -                                                      | -    |
| Uganda 2016 DHS   | -                              | -    | 0.79 (0.53, 1.17)       | 0.24 | 0.80 (0.60, 1.05)           | 0.11  | 0.97 (0.69, 1.36)                                      | 0.87 |
| Zambia 2007 DHS   | -                              | -    | -                       | -    | 1.34 (0.74, 2.43)           | 0.33  | 0.66 (0.13, 3.37)                                      | 0.62 |
| Zambia 2013 DHS   | -                              | -    | -                       | -    | 0.80 (0.63, 1.02)           | 0.07  | 1.14 (0.73, 1.80)                                      | 0.56 |
| Zimbabwe 2005 DHS | -                              | -    | -                       | -    | 1.18 (0.82, 1.68)           | 0.37  | 0.52 (0.24, 1.12)                                      | 0.10 |
| Zimbabwe 2010 DHS | -                              | -    | -                       | -    | 0.91 (0.67, 1.24)           | 0.55  | 1.30 (0.66, 2.55)                                      | 0.45 |
| Zimbabwe 2015 DHS | -                              | -    | -                       | -    | 0.66 (0.50, 0.87)           | 0.003 | 0.85 (0.55, 1.29)                                      | 0.44 |

AIS: AIDS Indicator Survey; CI: confidence intervals; DHS: Demographic and Health Survey; DRC: Democratic Republic of the Congo; MIS: Malaria Indicator Survey; OR: Odds Ratio; RDT: rapid diagnostic test. All p-values are calculated using the likelihood ratio test.

**Table D.** Association between improved housing, growth failure and anaemia in children aged 0-5 years in sub-Saharan Africa (adjusted results)

| Survey                 | Low height-for-age |        | Low weight-for-height |      | Low weight-for-age |      | Any anaemia       |       | Moderate to severe anaemia |      |
|------------------------|--------------------|--------|-----------------------|------|--------------------|------|-------------------|-------|----------------------------|------|
|                        | OR (95% CI)        | p      | OR (95% CI)           | p    | OR (95% CI)        | p    | OR (95% CI)       | p     | OR (95% CI)                | p    |
| Angola 2011 MIS        | -                  | -      | -                     | -    | -                  | -    | -                 | -     | -                          | -    |
| Angola 2015 DHS        | 0.80 (0.50, 1.28)  | 0.36   | 0.73 (0.27, 1.93)     | 0.52 | 0.84 (0.52, 1.37)  | 0.48 | -                 | -     | -                          | -    |
| Benin 2001 DHS         | -                  | -      | -                     | -    | -                  | -    | -                 | -     | -                          | -    |
| Benin 2006 DHS         | 1.01 (0.78, 1.31)  | 0.96   | 0.60 (0.35, 1.02)     | 0.06 | 0.97 (0.71, 1.34)  | 0.86 | 0.77 (0.45, 1.34) | 0.35  | 0.69 (0.41, 1.17)          | 0.17 |
| Benin 2012 DHS         | 0.62 (0.47, 0.82)  | <0.001 | 0.90 (0.62, 1.32)     | 0.59 | 0.70 (0.51, 0.97)  | 0.03 | 1.00 (0.58, 1.73) | 1.00  | 1.28 (0.69, 2.40)          | 0.44 |
| Burkina Faso 2010 DHS  | 0.82 (0.60, 1.11)  | 0.20   | 0.82 (0.56, 1.22)     | 0.33 | 0.76 (0.56, 1.02)  | 0.07 | 1.02 (0.71, 1.46) | 0.91  | 0.97 (0.74, 1.28)          | 0.82 |
| Burkina Faso 2014 MIS  | -                  | -      | -                     | -    | -                  | -    | -                 | -     | -                          | -    |
| Burundi 2010 DHS       | 0.69 (0.46, 1.05)  | 0.08   | 0.59 (0.23, 1.51)     | 0.27 | 0.77 (0.49, 1.20)  | 0.25 | 0.78 (0.51, 1.19) | 0.25  | 0.71 (0.40, 1.24)          | 0.22 |
| Burundi 2012 MIS       | -                  | -      | -                     | -    | -                  | -    | -                 | -     | -                          | -    |
| Burundi 2016 DHS       | 0.85 (0.64, 1.12)  | 0.24   | 1.27 (0.69, 2.33)     | 0.45 | 0.78 (0.59, 1.04)  | 0.09 | 0.72 (0.55, 0.95) | 0.02  | 0.78 (0.58, 1.06)          | 0.11 |
| Cameroon 2011 DHS      | 0.93 (0.67, 1.29)  | 0.66   | 1.02 (0.45, 2.28)     | 0.97 | 1.30 (0.84, 2.03)  | 0.24 | 0.89 (0.66, 1.20) | 0.44  | 0.88 (0.63, 1.24)          | 0.47 |
| Comoros 2012 DHS       | 0.90 (0.57, 1.44)  | 0.67   | 0.79 (0.42, 1.47)     | 0.46 | 0.96 (0.57, 1.60)  | 0.87 | -                 | -     | -                          | -    |
| Congo 2005 DHS         | 0.71 (0.45, 1.11)  | 0.14   | 0.83 (0.40, 1.74)     | 0.62 | 0.87 (0.44, 1.71)  | 0.68 | 0.75 (0.48, 1.18) | 0.22  | 0.61 (0.36, 1.05)          | 0.08 |
| Congo 2011 DHS         | 0.85 (0.50, 1.43)  | 0.53   | 1.37 (0.69, 2.74)     | 0.37 | 0.92 (0.54, 1.59)  | 0.78 | 1.10 (0.76, 1.61) | 0.61  | 0.72 (0.49, 1.05)          | 0.09 |
| DRC 2013 DHS           | 0.78 (0.51, 1.20)  | 0.26   | 1.18 (0.56, 2.48)     | 0.65 | 0.58 (0.34, 1.00)  | 0.05 | 0.89 (0.62, 1.26) | 0.50  | 0.79 (0.52, 1.18)          | 0.25 |
| Cote d'Ivoire 2012 DHS | 0.71 (0.45, 1.10)  | 0.12   | 0.56 (0.26, 1.20)     | 0.13 | 0.76 (0.48, 1.21)  | 0.25 | 1.10 (0.76, 1.61) | 0.61  | 0.90 (0.64, 1.29)          | 0.57 |
| Eswatini 2006 DHS      | 0.59 (0.33, 1.06)  | 0.08   | 1.52 (0.34, 6.84)     | 0.59 | 0.32 (0.09, 1.14)  | 0.08 | 0.54 (0.32, 0.90) | 0.02  | 0.80 (0.41, 1.53)          | 0.49 |
| Ethiopia 2016 DHS      | -                  | -      | -                     | -    | -                  | -    | -                 | -     | -                          | -    |
| Gabon 2012 DHS         | 0.63 (0.43, 0.93)  | 0.02   | 0.95 (0.50, 1.81)     | 0.88 | 0.69 (0.42, 1.15)  | 0.15 | 0.89 (0.68, 1.16) | 0.38  | 0.84 (0.63, 1.12)          | 0.24 |
| Gambia 2013 DHS        | 1.22 (0.79, 1.90)  | 0.37   | 0.66 (0.38, 1.15)     | 0.14 | 0.95 (0.62, 1.45)  | 0.80 | 0.58 (0.40, 0.85) | 0.005 | 0.78 (0.55, 1.10)          | 0.16 |
| Ghana 2008 DHS         | 1.28 (0.61, 2.72)  | 0.51   | 3.77 (1.03, 13.78)    | 0.04 | 1.62 (0.70, 3.75)  | 0.26 | 1.58 (0.67, 3.72) | 0.29  | 1.28 (0.58, 2.83)          | 0.54 |
| Ghana 2014 DHS         | 0.52 (0.24, 1.12)  | 0.10   | 0.86 (0.31, 2.36)     | 0.77 | 0.51 (0.26, 1.00)  | 0.05 | 0.94 (0.58, 1.51) | 0.79  | 0.80 (0.48, 1.33)          | 0.39 |
| Ghana 2016 MIS         | -                  | -      | -                     | -    | -                  | -    | -                 | -     | -                          | -    |
| Guinea 2012 DHS        | 1.11 (0.70, 1.76)  | 0.65   | 1.54 (0.82, 2.90)     | 0.18 | 0.98 (0.61, 1.58)  | 0.95 | 0.78 (0.53, 1.16) | 0.22  | 0.82 (0.58, 1.17)          | 0.28 |
| Kenya 2008 DHS         | 0.85 (0.55, 1.31)  | 0.46   | 1.15 (0.55, 2.42)     | 0.70 | 0.89 (0.53, 1.51)  | 0.67 | -                 | -     | -                          | -    |
| Kenya 2014 DHS         | 0.71 (0.48, 1.06)  | 0.09   | 0.98 (0.44, 2.22)     | 0.97 | 0.93 (0.59, 1.46)  | 0.74 | -                 | -     | -                          | -    |
| Kenya 2015 MIS         | -                  | -      | -                     | -    | -                  | -    | -                 | -     | -                          | -    |
| Lesotho 2009 DHS       | -                  | -      | -                     | -    | -                  | -    | -                 | -     | -                          | -    |
| Lesotho 2014 DHS       | -                  | -      | -                     | -    | -                  | -    | -                 | -     | -                          | -    |
| Liberia 2011 MIS       | -                  | -      | -                     | -    | -                  | -    | -                 | -     | -                          | -    |
| Liberia 2013 DHS       | 0.42 (0.12, 1.44)  | 0.17   | 0.47 (0.04, 4.93)     | 0.53 | 1.61 (0.43, 6.04)  | 0.48 | -                 | -     | -                          | -    |
| Liberia 2016 MIS       | -                  | -      | -                     | -    | -                  | -    | -                 | -     | -                          | -    |
| Madagascar 2008 DHS    | 0.18 (0.06, 0.59)  | 0.005  | -                     | -    | -                  | -    | 1.76 (0.50, 6.24) | 0.38  | 1.63 (0.37, 7.29)          | 0.52 |
| Madagascar 2011 MIS    | -                  | -      | -                     | -    | -                  | -    | -                 | -     | -                          | -    |
| Madagascar 2013 MIS    | -                  | -      | -                     | -    | -                  | -    | -                 | -     | -                          | -    |

**Table D.** Association between improved housing, growth failure and anaemia in children aged 0-5 years in sub-Saharan Africa (adjusted results)

| Survey                | Low height-for-age |        | Low weight-for-height |       | Low weight-for-age |       | Any anaemia        |      | Moderate to severe anaemia |      |
|-----------------------|--------------------|--------|-----------------------|-------|--------------------|-------|--------------------|------|----------------------------|------|
|                       | OR (95% CI)        | p      | OR (95% CI)           | p     | OR (95% CI)        | p     | OR (95% CI)        | p    | OR (95% CI)                | p    |
| Malawi 2010 DHS       | 0.77 (0.41, 1.46)  | 0.42   | 0.88 (0.18, 4.20)     | 0.87  | 1.34 (0.58, 3.07)  | 0.50  | 0.90 (0.48, 1.69)  | 0.73 | 1.15 (0.56, 2.33)          | 0.71 |
| Malawi 2012 MIS       | -                  | -      | -                     | -     | -                  | -     | -                  | -    | -                          | -    |
| Malawi 2014 MIS       | -                  | -      | -                     | -     | -                  | -     | -                  | -    | -                          | -    |
| Malawi 2015 DHS       | 0.66 (0.46, 0.94)  | 0.02   | 1.56 (0.68, 3.60)     | 0.29  | 1.07 (0.70, 1.62)  | 0.75  | 1.47 (1.01, 2.14)  | 0.04 | 1.14 (0.83, 1.58)          | 0.42 |
| Malawi 2017 MIS       | -                  | -      | -                     | -     | -                  | -     | -                  | -    | -                          | -    |
| Mali 2012 DHS         | 1.08 (0.68, 1.72)  | 0.73   | 0.57 (0.30, 1.09)     | 0.09  | 0.95 (0.61, 1.48)  | 0.82  | 0.84 (0.56, 1.27)  | 0.41 | 1.00 (0.68, 1.48)          | 0.99 |
| Mali 2015 MIS         | -                  | -      | -                     | -     | -                  | -     | -                  | -    | -                          | -    |
| Mozambique 2011 DHS   | 1.06 (0.80, 1.41)  | 0.68   | 1.13 (0.60, 2.14)     | 0.71  | 1.01 (0.68, 1.49)  | 0.97  | 0.86 (0.60, 1.24)  | 0.42 | 1.04 (0.69, 1.56)          | 0.86 |
| Mozambique 2015 AIS   | -                  | -      | -                     | -     | -                  | -     | -                  | -    | -                          | -    |
| Namibia 2006 DHS      | 0.64 (0.43, 0.97)  | 0.03   | 0.90 (0.45, 1.83)     | 0.78  | 0.68 (0.43, 1.06)  | 0.09  | -                  | -    | -                          | -    |
| Namibia 2013 DHS      | 0.42 (0.19, 0.92)  | 0.03   | 0.90 (0.37, 2.22)     | 0.82  | 0.86 (0.43, 1.69)  | 0.65  | 0.97 (0.56, 1.66)  | 0.90 | 1.46 (0.75, 2.85)          | 0.26 |
| Niger 2012 DHS        | 1.03 (0.57, 1.86)  | 0.93   | 1.72 (0.82, 3.61)     | 0.15  | 0.99 (0.56, 1.73)  | 0.96  | 1.10 (0.59, 2.02)  | 0.77 | 1.19 (0.69, 2.07)          | 0.53 |
| Nigeria 2008 DHS      | 1.14 (0.86, 1.51)  | 0.37   | 0.99 (0.64, 1.53)     | 0.96  | 0.92 (0.65, 1.32)  | 0.66  | -                  | -    | -                          | -    |
| Nigeria 2010 MIS      | -                  | -      | -                     | -     | -                  | -     | -                  | -    | -                          | -    |
| Nigeria 2013 DHS      | 0.92 (0.69, 1.22)  | 0.55   | 0.68 (0.51, 0.90)     | 0.007 | 0.85 (0.65, 1.11)  | 0.23  | -                  | -    | -                          | -    |
| Nigeria 2015 MIS      | -                  | -      | -                     | -     | -                  | -     | -                  | -    | -                          | -    |
| Rwanda 2010 DHS       | 0.59 (0.43, 0.81)  | <0.001 | 1.99 (0.82, 4.79)     | 0.13  | 0.54 (0.35, 0.83)  | 0.005 | 0.95 (0.70, 1.29)  | 0.73 | 0.84 (0.54, 1.30)          | 0.43 |
| Rwanda 2015 DHS       | 0.84 (0.60, 1.18)  | 0.31   | 0.49 (0.14, 1.76)     | 0.28  | 0.78 (0.46, 1.34)  | 0.37  | 0.66 (0.48, 0.90)  | 0.01 | 0.74 (0.46, 1.19)          | 0.22 |
| Rwanda 2017 MIS       | -                  | -      | -                     | -     | -                  | -     | -                  | -    | -                          | -    |
| Senegal 2008 MIS      | -                  | -      | -                     | -     | -                  | -     | -                  | -    | -                          | -    |
| Senegal 2010 DHS      | 1.22 (0.80, 1.84)  | 0.36   | 0.86 (0.51, 1.45)     | 0.57  | 1.04 (0.69, 1.54)  | 0.86  | 0.69 (0.48, 1.01)  | 0.05 | 0.79 (0.56, 1.10)          | 0.16 |
| Senegal 2012 DHS      | 0.94 (0.65, 1.37)  | 0.75   | 0.85 (0.55, 1.33)     | 0.48  | 0.94 (0.69, 1.28)  | 0.71  | 0.80 (0.62, 1.04)  | 0.10 | 0.95 (0.74, 1.21)          | 0.66 |
| Senegal 2014 DHS      | 0.63 (0.42, 0.95)  | 0.03   | 1.09 (0.67, 1.79)     | 0.72  | 0.91 (0.65, 1.27)  | 0.57  | 0.87 (0.67, 1.13)  | 0.30 | 0.75 (0.56, 1.00)          | 0.05 |
| Senegal 2015 DHS      | 0.92 (0.66, 1.27)  | 0.61   | 1.01 (0.67, 1.53)     | 0.94  | 0.84 (0.63, 1.11)  | 0.22  | 0.91 (0.72, 1.16)  | 0.46 | 0.90 (0.70, 1.15)          | 0.40 |
| Senegal 2016 DHS      | 0.80 (0.53, 1.22)  | 0.30   | 0.66 (0.41, 1.08)     | 0.10  | 0.67 (0.48, 0.94)  | 0.02  | 0.83 (0.64, 1.09)  | 0.18 | 0.82 (0.62, 1.08)          | 0.15 |
| Sierra Leone 2008 DHS | 0.40 (0.18, 0.92)  | 0.03   | 0.84 (0.22, 3.20)     | 0.80  | 0.53 (0.20, 1.39)  | 0.20  | 2.43 (0.56, 10.50) | 0.24 | 1.49 (0.36, 6.17)          | 0.58 |
| Sierra Leone 2013 DHS | 0.95 (0.63, 1.45)  | 0.82   | 1.02 (0.49, 2.11)     | 0.96  | 1.26 (0.77, 2.06)  | 0.37  | 1.01 (0.64, 1.57)  | 0.98 | 1.12 (0.75, 1.66)          | 0.58 |
| Sierra Leone 2016 MIS | -                  | -      | -                     | -     | -                  | -     | -                  | -    | -                          | -    |
| Tanzania 2004 DHS     | -                  | -      | -                     | -     | -                  | -     | -                  | -    | -                          | -    |
| Tanzania 2010 DHS     | 0.77 (0.52, 1.13)  | 0.18   | 0.75 (0.40, 1.38)     | 0.36  | 0.79 (0.51, 1.22)  | 0.28  | 0.90 (0.66, 1.22)  | 0.49 | 0.92 (0.65, 1.30)          | 0.63 |
| Tanzania 2012 AIS     | -                  | -      | -                     | -     | -                  | -     | -                  | -    | -                          | -    |
| Tanzania 2017 MIS     | -                  | -      | -                     | -     | -                  | -     | -                  | -    | -                          | -    |
| Togo 2013 DHS         | 0.85 (0.49, 1.48)  | 0.57   | 1.66 (0.72, 3.81)     | 0.23  | 0.70 (0.41, 1.21)  | 0.21  | 0.73 (0.48, 1.11)  | 0.15 | 0.64 (0.42, 0.97)          | 0.04 |
| Uganda 2006 DHS       | 0.80 (0.23, 2.76)  | 0.72   | 0.29 (0.02, 4.74)     | 0.39  | 1.02 (0.19, 5.46)  | 0.98  | 0.16 (0.03, 0.88)  | 0.04 | 0.29 (0.05, 1.68)          | 0.17 |
| Uganda 2009 MIS       | -                  | -      | -                     | -     | -                  | -     | -                  | -    | -                          | -    |

**Table D.** Association between improved housing, growth failure and anaemia in children aged 0-5 years in sub-Saharan Africa (adjusted results)

| Survey            | Low height-for-age |      | Low weight-for-height |      | Low weight-for-age |      | Any anaemia       |      | Moderate to severe anaemia |      |
|-------------------|--------------------|------|-----------------------|------|--------------------|------|-------------------|------|----------------------------|------|
|                   | OR (95% CI)        | p    | OR (95% CI)           | p    | OR (95% CI)        | p    | OR (95% CI)       | p    | OR (95% CI)                | p    |
| Uganda 2014 MIS   | -                  | -    | -                     | -    | -                  | -    | -                 | -    | -                          | -    |
| Uganda 2016 DHS   | 0.47 (0.18, 1.21)  | 0.12 | 5.01 (0.75, 33.59)    | 0.10 | 0.47 (0.17, 1.28)  | 0.14 | 1.17 (0.65, 2.10) | 0.61 | 1.25 (0.67, 2.35)          | 0.49 |
| Zambia 2007 DHS   | 0.80 (0.54, 1.20)  | 0.28 | 1.51 (0.69, 3.29)     | 0.30 | 0.95 (0.57, 1.58)  | 0.84 | -                 | -    | -                          | -    |
| Zambia 2013 DHS   | 0.96 (0.78, 1.17)  | 0.67 | 0.86 (0.58, 1.27)     | 0.45 | 0.85 (0.66, 1.09)  | 0.20 | -                 | -    | -                          | -    |
| Zimbabwe 2005 DHS | 1.00 (0.75, 1.32)  | 0.99 | 0.91 (0.53, 1.57)     | 0.73 | 0.91 (0.62, 1.32)  | 0.61 | 0.83 (0.63, 1.11) | 0.21 | 0.86 (0.63, 1.17)          | 0.33 |
| Zimbabwe 2010 DHS | 0.73 (0.55, 0.95)  | 0.02 | 1.30 (0.65, 2.60)     | 0.46 | 0.83 (0.58, 1.19)  | 0.31 | 0.83 (0.63, 1.09) | 0.18 | 0.98 (0.73, 1.31)          | 0.87 |
| Zimbabwe 2015 DHS | 0.84 (0.62, 1.13)  | 0.24 | 0.54 (0.27, 1.09)     | 0.09 | 0.68 (0.45, 1.04)  | 0.08 | 1.01 (0.78, 1.30) | 0.96 | 1.20 (0.88, 1.64)          | 0.25 |

AIS: AIDS Indicator Survey; CI: confidence intervals; DHS: Demographic and Health Survey; DRC: Democratic Republic of the Congo; MIS: Malaria Indicator Survey; OR: Odds Ratio. All p-values are calculated using the likelihood ratio test.

**Table E.** Association between ITN use, improved drinking water source and improved sanitation facility and child health outcomes in children aged 0-5 years in sub-Saharan Africa (adjusted results)

| Survey                 | ITN use the previous night     |        |                         |        | Improved drinking water source |       | Improved sanitation facility source |       |
|------------------------|--------------------------------|--------|-------------------------|--------|--------------------------------|-------|-------------------------------------|-------|
|                        | Malaria positive by microscopy |        | Malaria positive by RDT |        | Diarrhoea in past two weeks    |       | Diarrhoea in past two weeks         |       |
|                        | OR (95% CI)                    | p      | OR (95% CI)             | p      | OR (95% CI)                    | p     | OR (95% CI)                         | p     |
| Angola 2011 MIS        | 0.62 (0.41, 0.95)              | 0.03   | 0.85 (0.58, 1.25)       | 0.40   | -                              | -     | -                                   | -     |
| Angola 2015 DHS        | -                              | -      | 0.85 (0.68, 1.07)       | 0.17   | -                              | -     | -                                   | -     |
| Benin 2001 DHS         | -                              | -      | -                       | -      | 1.31 (0.88, 1.95)              | 0.18  | 1.26 (0.70, 2.26)                   | 0.45  |
| Benin 2006 DHS         | -                              | -      | -                       | -      | 0.75 (0.58, 0.97)              | 0.03  | 1.07 (0.81, 1.41)                   | 0.63  |
| Benin 2012 DHS         | 1.08 (0.89, 1.31)              | 0.45   | 0.97 (0.79, 1.20)       | 0.78   | 0.82 (0.59, 1.13)              | 0.22  | 0.90 (0.65, 1.24)                   | 0.52  |
| Burkina Faso 2010 DHS  | 0.94 (0.81, 1.09)              | 0.40   | 1.04 (0.89, 1.22)       | 0.60   | 0.96 (0.79, 1.16)              | 0.68  | 1.09 (0.90, 1.33)                   | 0.35  |
| Burkina Faso 2014 MIS  | 0.90 (0.78, 1.04)              | 0.15   | 0.86 (0.74, 1.01)       | 0.06   | -                              | -     | -                                   | -     |
| Burundi 2010 DHS       | -                              | -      | -                       | -      | 0.68 (0.55, 0.86)              | 0.001 | 0.89 (0.71, 1.11)                   | 0.29  |
| Burundi 2012 MIS       | 0.79 (0.61, 1.02)              | 0.07   | 0.71 (0.55, 0.91)       | 0.01   | -                              | -     | -                                   | -     |
| Burundi 2016 DHS       | 0.69 (0.59, 0.80)              | <0.001 | 0.67 (0.58, 0.78)       | <0.001 | 0.99 (0.80, 1.22)              | 0.90  | 0.99 (0.85, 1.14)                   | 0.85  |
| Cameroon 2011 DHS      | -                              | -      | 0.82 (0.70, 0.97)       | 0.02   | 0.77 (0.57, 1.05)              | 0.10  | 0.96 (0.72, 1.26)                   | 0.75  |
| Comoros 2012 DHS       | -                              | -      | -                       | -      | 1.06 (0.59, 1.91)              | 0.85  | 1.08 (0.71, 1.64)                   | 0.73  |
| Congo 2005 DHS         | -                              | -      | -                       | -      | 1.13 (0.76, 1.66)              | 0.55  | 0.82 (0.59, 1.13)                   | 0.22  |
| Congo 2011 DHS         | -                              | -      | -                       | -      | 0.93 (0.74, 1.17)              | 0.54  | 0.71 (0.58, 0.88)                   | 0.002 |
| DRC 2013 DHS           | 0.89 (0.78, 1.02)              | 0.09   | 0.86 (0.76, 0.98)       | 0.03   | 0.86 (0.70, 1.04)              | 0.12  | 1.04 (0.87, 1.24)                   | 0.68  |
| Cote d'Ivoire 2012 DHS | 0.85 (0.69, 1.04)              | 0.12   | 0.73 (0.62, 0.86)       | <0.001 | 1.38 (1.01, 1.88)              | 0.04  | 1.09 (0.85, 1.40)                   | 0.49  |
| Eswatini 2006 DHS      | -                              | -      | -                       | -      | 0.99 (0.64, 1.53)              | 0.96  | 0.79 (0.50, 1.25)                   | 0.32  |
| Ethiopia 2016 DHS      | -                              | -      | -                       | -      | 0.89 (0.43, 1.83)              | 0.75  | 0.91 (0.51, 1.64)                   | 0.75  |
| Gabon 2012 DHS         | -                              | -      | -                       | -      | 0.81 (0.59, 1.12)              | 0.20  | 1.04 (0.82, 1.31)                   | 0.75  |
| Gambia 2013 DHS        | 0.59 (0.15, 2.30)              | 0.44   | 0.56 (0.28, 1.14)       | 0.11   | 1.13 (0.79, 1.60)              | 0.51  | 1.27 (0.99, 1.64)                   | 0.06  |
| Ghana 2008 DHS         | -                              | -      | -                       | -      | 0.18 (0.04, 0.72)              | 0.02  | 0.46 (0.14, 1.48)                   | 0.19  |
| Ghana 2014 DHS         | 0.93 (0.75, 1.15)              | 0.48   | 0.96 (0.78, 1.20)       | 0.74   | 1.46 (1.00, 2.14)              | 0.05  | 0.77 (0.54, 1.11)                   | 0.17  |
| Ghana 2016 MIS         | 0.75 (0.61, 0.93)              | 0.01   | 0.95 (0.78, 1.17)       | 0.66   | -                              | -     | -                                   | -     |
| Guinea 2012 DHS        | 0.98 (0.79, 1.21)              | 0.86   | 1.04 (0.83, 1.30)       | 0.73   | 0.84 (0.55, 1.28)              | 0.41  | 1.05 (0.75, 1.47)                   | 0.78  |
| Kenya 2008 DHS         | -                              | -      | -                       | -      | 1.01 (0.59, 1.72)              | 0.97  | 0.86 (0.52, 1.43)                   | 0.57  |
| Kenya 2014 DHS         | -                              | -      | -                       | -      | 0.97 (0.74, 1.28)              | 0.85  | 0.70 (0.54, 0.89)                   | 0.004 |
| Kenya 2015 MIS         | 0.45 (0.31, 0.65)              | <0.001 | 0.62 (0.45, 0.85)       | 0.003  | -                              | -     | -                                   | -     |
| Lesotho 2009 DHS       | -                              | -      | -                       | -      | 0.59 (0.20, 1.75)              | 0.34  | 1.20 (0.42, 3.39)                   | 0.74  |
| Lesotho 2014 DHS       | -                              | -      | -                       | -      | 0.85 (0.51, 1.43)              | 0.55  | 0.67 (0.42, 1.06)                   | 0.09  |
| Liberia 2011 MIS       | 0.91 (0.76, 1.10)              | 0.34   | 0.99 (0.83, 1.18)       | 0.93   | -                              | -     | -                                   | -     |

**Table E.** Association between ITN use, improved drinking water source and improved sanitation facility and child health outcomes in children aged 0-5 years in sub-Saharan Africa (adjusted results)

| Survey              | ITN use the previous night     |        |                         |        | Improved drinking water source |      | Improved sanitation facility source |      |
|---------------------|--------------------------------|--------|-------------------------|--------|--------------------------------|------|-------------------------------------|------|
|                     | Malaria positive by microscopy |        | Malaria positive by RDT |        | Diarrhoea in past two weeks    |      | Diarrhoea in past two weeks         |      |
|                     | OR (95% CI)                    | p      | OR (95% CI)             | p      | OR (95% CI)                    | p    | OR (95% CI)                         | p    |
| Liberia 2013 DHS    | -                              | -      | -                       | -      | 1.23 (0.72, 2.11)              | 0.45 | 0.77 (0.53, 1.13)                   | 0.19 |
| Liberia 2016 MIS    | -                              | -      | 0.85 (0.70, 1.03)       | 0.09   | -                              | -    | -                                   | -    |
| Madagascar 2008 DHS | -                              | -      | -                       | -      | 0.96 (0.57, 1.62)              | 0.87 | 1.08 (0.64, 1.81)                   | 0.78 |
| Madagascar 2011 MIS | 0.60 (0.39, 0.92)              | 0.02   | 0.71 (0.50, 1.02)       | 0.06   | -                              | -    | -                                   | -    |
| Madagascar 2013 MIS | 0.69 (0.51, 0.94)              | 0.02   | 0.73 (0.55, 0.97)       | 0.03   | -                              | -    | -                                   | -    |
| Malawi 2010 DHS     | -                              | -      | -                       | -      | 0.92 (0.78, 1.08)              | 0.32 | 0.78 (0.64, 0.96)                   | 0.02 |
| Malawi 2012 MIS     | 0.63 (0.48, 0.81)              | <0.001 | 0.71 (0.55, 0.93)       | 0.01   | -                              | -    | -                                   | -    |
| Malawi 2014 MIS     | 0.69 (0.52, 0.93)              | 0.01   | 0.71 (0.53, 0.96)       | 0.02   | -                              | -    | -                                   | -    |
| Malawi 2015 DHS     | -                              | -      | -                       | -      | 1.08 (0.88, 1.32)              | 0.46 | 0.89 (0.76, 1.03)                   | 0.12 |
| Malawi 2017 MIS     | 0.61 (0.47, 0.79)              | <0.001 | 0.70 (0.55, 0.89)       | 0.004  | -                              | -    | -                                   | -    |
| Mali 2012 DHS       | 0.99 (0.84, 1.16)              | 0.88   | 1.00 (0.86, 1.18)       | 0.96   | 1.17 (0.66, 2.07)              | 0.60 | 1.13 (0.74, 1.72)                   | 0.56 |
| Mali 2015 MIS       | 0.86 (0.76, 0.99)              | 0.03   | 0.83 (0.72, 0.96)       | 0.01   | -                              | -    | -                                   | -    |
| Mozambique 2011 DHS | 0.99 (0.82, 1.19)              | 0.91   | 0.94 (0.78, 1.13)       | 0.48   | 1.01 (0.72, 1.41)              | 0.97 | 1.05 (0.83, 1.33)                   | 0.70 |
| Mozambique 2015 AIS | -                              | -      | 0.96 (0.80, 1.16)       | 0.66   | -                              | -    | -                                   | -    |
| Namibia 2006 DHS    | -                              | -      | -                       | -      | 0.72 (0.38, 1.37)              | 0.32 | 0.73 (0.41, 1.30)                   | 0.28 |
| Namibia 2013 DHS    | -                              | -      | -                       | -      | 1.12 (0.74, 1.70)              | 0.59 | 1.17 (0.81, 1.71)                   | 0.40 |
| Niger 2012 DHS      | -                              | -      | -                       | -      | 0.91 (0.58, 1.41)              | 0.66 | 0.81 (0.58, 1.14)                   | 0.23 |
| Nigeria 2008 DHS    | -                              | -      | -                       | -      | 1.16 (0.52, 2.61)              | 0.72 | 0.52 (0.21, 1.25)                   | 0.14 |
| Nigeria 2010 MIS    | 0.89 (0.74, 1.06)              | 0.20   | 0.93 (0.78, 1.12)       | 0.45   | -                              | -    | -                                   | -    |
| Nigeria 2013 DHS    | -                              | -      | -                       | -      | 1.12 (0.79, 1.61)              | 0.52 | 0.77 (0.51, 1.17)                   | 0.22 |
| Nigeria 2015 MIS    | 0.98 (0.84, 1.16)              | 0.84   | 1.06 (0.91, 1.22)       | 0.46   | -                              | -    | -                                   | -    |
| Rwanda 2010 DHS     | 0.68 (0.38, 1.21)              | 0.19   | 0.51 (0.33, 0.80)       | 0.003  | 0.75 (0.59, 0.96)              | 0.02 | 1.00 (0.80, 1.25)                   | 1.00 |
| Rwanda 2015 DHS     | 0.52 (0.32, 0.84)              | 0.01   | 0.63 (0.46, 0.86)       | 0.004  | 1.06 (0.85, 1.33)              | 0.62 | 1.04 (0.85, 1.26)                   | 0.71 |
| Rwanda 2017 MIS     | 0.53 (0.37, 0.77)              | <0.001 | 0.51 (0.37, 0.71)       | <0.001 | -                              | -    | -                                   | -    |
| Senegal 2008 MIS    | 1.21 (0.85, 1.70)              | 0.29   | 1.22 (0.93, 1.59)       | 0.15   | -                              | -    | -                                   | -    |
| Senegal 2010 DHS    | 1.15 (0.78, 1.70)              | 0.46   | 1.11 (0.74, 1.68)       | 0.61   | 0.97 (0.75, 1.24)              | 0.79 | 0.90 (0.73, 1.13)                   | 0.37 |
| Senegal 2012 DHS    | 0.68 (0.49, 0.94)              | 0.02   | 0.70 (0.52, 0.95)       | 0.02   | 0.81 (0.58, 1.14)              | 0.23 | 1.11 (0.81, 1.51)                   | 0.53 |
| Senegal 2014 DHS    | 0.87 (0.49, 1.54)              | 0.63   | 0.95 (0.53, 1.68)       | 0.85   | 1.37 (0.98, 1.93)              | 0.07 | 1.19 (0.87, 1.62)                   | 0.28 |
| Senegal 2015 DHS    | 1.38 (0.54, 3.52)              | 0.50   | 0.71 (0.37, 1.35)       | 0.30   | 1.11 (0.83, 1.50)              | 0.48 | 1.00 (0.74, 1.35)                   | 0.99 |
| Senegal 2016 DHS    | 1.28 (0.76, 2.14)              | 0.35   | 1.19 (0.73, 1.94)       | 0.48   | 0.96 (0.66, 1.39)              | 0.83 | 1.15 (0.84, 1.59)                   | 0.38 |

**Table E.** Association between ITN use, improved drinking water source and improved sanitation facility and child health outcomes in children aged 0-5 years in sub-Saharan Africa (adjusted results)

| Survey                | ITN use the previous night     |        |                         |        | Improved drinking water source |      | Improved sanitation facility source |      |
|-----------------------|--------------------------------|--------|-------------------------|--------|--------------------------------|------|-------------------------------------|------|
|                       | Malaria positive by microscopy |        | Malaria positive by RDT |        | Diarrhoea in past two weeks    |      | Diarrhoea in past two weeks         |      |
|                       | OR (95% CI)                    | p      | OR (95% CI)             | p      | OR (95% CI)                    | p    | OR (95% CI)                         | p    |
| Sierra Leone 2008 DHS | -                              | -      | -                       | -      | 3.61 (1.23, 10.57)             | 0.02 | 0.84 (0.39, 1.82)                   | 0.66 |
| Sierra Leone 2013 DHS | -                              | -      | -                       | -      | 1.10 (0.81, 1.49)              | 0.55 | 1.14 (0.89, 1.45)                   | 0.29 |
| Sierra Leone 2016 MIS | 0.87 (0.78, 0.97)              | 0.01   | 0.92 (0.82, 1.04)       | 0.17   | -                              | -    | -                                   | -    |
| Tanzania 2004 DHS     | -                              | -      | -                       | -      | 1.12 (0.71, 1.76)              | 0.64 | 1.35 (0.79, 2.31)                   | 0.28 |
| Tanzania 2010 DHS     | -                              | -      | -                       | -      | 0.93 (0.66, 1.30)              | 0.66 | 1.02 (0.75, 1.38)                   | 0.89 |
| Tanzania 2012 AIS     | 0.81 (0.61, 1.07)              | 0.14   | 0.86 (0.69, 1.07)       | 0.18   | -                              | -    | -                                   | -    |
| Tanzania 2017 MIS     | -                              | -      | 0.79 (0.64, 0.98)       | 0.04   | -                              | -    | -                                   | -    |
| Togo 2013 DHS         | 0.78 (0.66, 0.93)              | 0.01   | 0.75 (0.63, 0.90)       | 0.002  | 0.97 (0.72, 1.29)              | 0.83 | 0.85 (0.61, 1.20)                   | 0.36 |
| Uganda 2006 DHS       | -                              | -      | -                       | -      | 1.36 (0.77, 2.39)              | 0.28 | 1.19 (0.78, 1.82)                   | 0.42 |
| Uganda 2009 MIS       | 0.67 (0.55, 0.80)              | <0.001 | 0.67 (0.56, 0.81)       | <0.001 | -                              | -    | -                                   | -    |
| Uganda 2014 MIS       | 1.03 (0.83, 1.27)              | 0.81   | 0.93 (0.76, 1.14)       | 0.48   | -                              | -    | -                                   | -    |
| Uganda 2016 DHS       | -                              | -      | 0.69 (0.58, 0.81)       | <0.001 | 0.93 (0.73, 1.18)              | 0.54 | 1.00 (0.83, 1.21)                   | 0.98 |
| Zambia 2007 DHS       | -                              | -      | -                       | -      | 0.97 (0.57, 1.64)              | 0.91 | 1.11 (0.67, 1.83)                   | 0.68 |
| Zambia 2013 DHS       | -                              | -      | -                       | -      | 1.09 (0.89, 1.32)              | 0.41 | 1.00 (0.84, 1.19)                   | 0.99 |
| Zimbabwe 2005 DHS     | -                              | -      | -                       | -      | 1.47 (1.00, 2.17)              | 0.05 | 0.98 (0.69, 1.40)                   | 0.93 |
| Zimbabwe 2010 DHS     | -                              | -      | -                       | -      | 0.86 (0.59, 1.25)              | 0.43 | 0.84 (0.61, 1.17)                   | 0.31 |
| Zimbabwe 2015 DHS     | -                              | -      | -                       | -      | 0.69 (0.49, 0.98)              | 0.04 | 1.17 (0.87, 1.58)                   | 0.30 |

AIS: AIDS Indicator Survey; CI: confidence intervals; DHS: Demographic and Health Survey; DRC: Democratic Republic of the Congo; ITN: insecticide-treated bednet; MIS: Malaria Indicator Survey; OR: Odds Ratio; RDT: rapid diagnostic test. All p-values are calculated using the likelihood ratio test.

**Table F.** Association between finished house construction materials and malaria, diarrhoea and acute respiratory infection in children aged 0-5 years in sub-Saharan Africa (crude results)

| Survey                 | Malaria positive by microscopy |        | Malaria positive by RDT |        | Diarrhoea in past two weeks |      | Cough with short and rapid breathing in past two weeks |      |
|------------------------|--------------------------------|--------|-------------------------|--------|-----------------------------|------|--------------------------------------------------------|------|
|                        | OR (95% CI)                    | p      | OR (95% CI)             | p      | OR (95% CI)                 | p    | OR (95% CI)                                            | p    |
| Angola 2011 MIS        | 0.98 (0.53, 1.81)              | 0.95   | 0.61 (0.33, 1.12)       | 0.11   | -                           | -    | -                                                      | -    |
| Angola 2015 DHS        | -                              | -      | 0.79 (0.61, 1.03)       | 0.08   | -                           | -    | -                                                      | -    |
| Benin 2001 DHS         | -                              | -      | -                       | -      | 1.12 (0.80, 1.57)           | 0.51 | -                                                      | -    |
| Benin 2006 DHS         | -                              | -      | -                       | -      | 1.00 (0.79, 1.26)           | 1.00 | 0.99 (0.69, 1.43)                                      | 0.96 |
| Benin 2012 DHS         | 0.77 (0.62, 0.95)              | 0.02   | 0.77 (0.62, 0.97)       | 0.02   | 1.06 (0.80, 1.39)           | 0.70 | -                                                      | -    |
| Burkina Faso 2010 DHS  | 0.94 (0.80, 1.11)              | 0.49   | 0.86 (0.71, 1.05)       | 0.14   | 0.91 (0.78, 1.07)           | 0.27 | -                                                      | -    |
| Burkina Faso 2014 MIS  | 0.87 (0.76, 1.00)              | 0.06   | 0.94 (0.80, 1.09)       | 0.38   | -                           | -    | -                                                      | -    |
| Burundi 2010 DHS       | -                              | -      | -                       | -      | 0.80 (0.66, 0.96)           | 0.02 | 1.02 (0.70, 1.49)                                      | 0.91 |
| Burundi 2012 MIS       | 0.62 (0.45, 0.85)              | 0.003  | 0.51 (0.37, 0.69)       | <0.001 | -                           | -    | -                                                      | -    |
| Burundi 2016 DHS       | 0.64 (0.55, 0.74)              | <0.001 | 0.61 (0.53, 0.71)       | <0.001 | 0.88 (0.76, 1.01)           | 0.07 | 0.93 (0.77, 1.11)                                      | 0.41 |
| Cameroon 2011 DHS      | -                              | -      | 0.78 (0.65, 0.93)       | 0.006  | 0.75 (0.57, 0.98)           | 0.04 | 1.43 (0.96, 2.13)                                      | 0.08 |
| Comoros 2012 DHS       | -                              | -      | -                       | -      | 1.66 (1.06, 2.60)           | 0.03 | 2.35 (0.77, 7.14)                                      | 0.13 |
| Congo 2005 DHS         | -                              | -      | -                       | -      | 0.77 (0.56, 1.06)           | 0.11 | 1.14 (0.63, 2.07)                                      | 0.67 |
| Congo 2011 DHS         | -                              | -      | -                       | -      | 1.05 (0.86, 1.27)           | 0.66 | 0.84 (0.59, 1.19)                                      | 0.33 |
| DRC 2013 DHS           | 0.71 (0.56, 0.91)              | 0.006  | 0.72 (0.57, 0.91)       | 0.006  | 1.10 (0.92, 1.33)           | 0.30 | 0.84 (0.63, 1.11)                                      | 0.22 |
| Cote d'Ivoire 2012 DHS | 0.77 (0.61, 0.97)              | 0.03   | 0.84 (0.69, 1.03)       | 0.10   | 0.78 (0.59, 1.04)           | 0.09 | 0.66 (0.34, 1.28)                                      | 0.22 |
| Eswatini 2006 DHS      | -                              | -      | -                       | -      | 0.63 (0.41, 0.96)           | 0.03 | 0.76 (0.40, 1.48)                                      | 0.42 |
| Ethiopia 2016 DHS      | -                              | -      | -                       | -      | 0.88 (0.49, 1.58)           | 0.67 | 1.47 (0.64, 3.39)                                      | 0.36 |
| Gabon 2012 DHS         | -                              | -      | -                       | -      | 1.06 (0.83, 1.36)           | 0.63 | 0.88 (0.61, 1.25)                                      | 0.47 |
| Gambia 2013 DHS        | 1.25 (0.29, 5.34)              | 0.77   | 0.55 (0.24, 1.30)       | 0.17   | 1.07 (0.81, 1.40)           | 0.65 | -                                                      | -    |
| Ghana 2008 DHS         | -                              | -      | -                       | -      | 0.39 (0.11, 1.37)           | 0.14 | -                                                      | -    |
| Ghana 2014 DHS         | 0.70 (0.52, 0.95)              | 0.02   | 0.73 (0.53, 1.01)       | 0.06   | 1.07 (0.66, 1.72)           | 0.79 | 0.91 (0.24, 3.46)                                      | 0.89 |
| Ghana 2016 MIS         | 0.88 (0.63, 1.23)              | 0.46   | 0.80 (0.58, 1.10)       | 0.17   | -                           | -    | -                                                      | -    |
| Guinea 2012 DHS        | 0.95 (0.76, 1.20)              | 0.69   | 0.89 (0.70, 1.13)       | 0.36   | 1.02 (0.70, 1.49)           | 0.92 | 0.87 (0.35, 2.16)                                      | 0.76 |
| Kenya 2008 DHS         | -                              | -      | -                       | -      | 0.76 (0.45, 1.28)           | 0.30 | 3.65 (0.93, 14.31)                                     | 0.06 |
| Kenya 2014 DHS         | -                              | -      | -                       | -      | 0.89 (0.68, 1.15)           | 0.36 | 0.97 (0.64, 1.46)                                      | 0.88 |
| Kenya 2015 MIS         | 0.86 (0.55, 1.34)              | 0.50   | 0.73 (0.50, 1.07)       | 0.10   | -                           | -    | -                                                      | -    |
| Lesotho 2009 DHS       | -                              | -      | -                       | -      | 1.23 (0.57, 2.64)           | 0.59 | -                                                      | -    |
| Lesotho 2014 DHS       | -                              | -      | -                       | -      | 0.71 (0.47, 1.06)           | 0.09 | 0.73 (0.37, 1.43)                                      | 0.36 |
| Liberia 2011 MIS       | 0.88 (0.69, 1.13)              | 0.31   | 0.89 (0.71, 1.12)       | 0.33   | -                           | -    | -                                                      | -    |
| Liberia 2013 DHS       | -                              | -      | -                       | -      | 1.09 (0.74, 1.59)           | 0.66 | 1.56 (0.75, 3.21)                                      | 0.23 |
| Liberia 2016 MIS       | -                              | -      | 0.81 (0.64, 1.02)       | 0.07   | -                           | -    | -                                                      | -    |
| Madagascar 2008 DHS    | -                              | -      | -                       | -      | 1.24 (0.79, 1.96)           | 0.35 | -                                                      | -    |
| Madagascar 2011 MIS    | 0.44 (0.19, 1.04)              | 0.06   | 0.76 (0.44, 1.29)       | 0.31   | -                           | -    | -                                                      | -    |



**Table F.** Association between finished house construction materials and malaria, diarrhoea and acute respiratory infection in children aged 0-5 years in sub-Saharan Africa (crude results)

| Survey                | Malaria positive by microscopy |        | Malaria positive by RDT |        | Diarrhoea in past two weeks |      | Cough with short and rapid breathing in past two weeks |      |
|-----------------------|--------------------------------|--------|-------------------------|--------|-----------------------------|------|--------------------------------------------------------|------|
|                       | OR (95% CI)                    | p      | OR (95% CI)             | p      | OR (95% CI)                 | p    | OR (95% CI)                                            | p    |
| Madagascar 2013 MIS   | 0.60 (0.32, 1.12)              | 0.11   | 0.88 (0.52, 1.49)       | 0.64   | -                           | -    | -                                                      | -    |
| Malawi 2010 DHS       | -                              | -      | -                       | -      | 0.94 (0.83, 1.07)           | 0.35 | 0.85 (0.70, 1.04)                                      | 0.11 |
| Malawi 2012 MIS       | 0.49 (0.35, 0.68)              | <0.001 | 0.48 (0.36, 0.65)       | <0.001 | -                           | -    | -                                                      | -    |
| Malawi 2014 MIS       | 0.89 (0.66, 1.20)              | 0.44   | 0.85 (0.63, 1.13)       | 0.26   | -                           | -    | -                                                      | -    |
| Malawi 2015 DHS       | -                              | -      | -                       | -      | 0.90 (0.79, 1.01)           | 0.08 | 0.91 (0.77, 1.08)                                      | 0.29 |
| Malawi 2017 MIS       | 0.65 (0.50, 0.85)              | 0.002  | 0.61 (0.48, 0.77)       | <0.001 | -                           | -    | -                                                      | -    |
| Mali 2012 DHS         | 0.70 (0.55, 0.89)              | 0.004  | 0.86 (0.67, 1.11)       | 0.25   | 1.34 (0.88, 2.04)           | 0.18 | -                                                      | -    |
| Mali 2015 MIS         | 0.81 (0.68, 0.96)              | 0.01   | 0.89 (0.75, 1.07)       | 0.21   | -                           | -    | -                                                      | -    |
| Mozambique 2011 DHS   | 0.78 (0.58, 1.05)              | 0.11   | 0.66 (0.50, 0.88)       | 0.005  | 0.93 (0.70, 1.24)           | 0.64 | -                                                      | -    |
| Mozambique 2015 AIS   | -                              | -      | 0.83 (0.63, 1.11)       | 0.21   | -                           | -    | -                                                      | -    |
| Namibia 2006 DHS      | -                              | -      | -                       | -      | 0.69 (0.39, 1.23)           | 0.21 | 1.15 (0.25, 5.34)                                      | 0.86 |
| Namibia 2013 DHS      | -                              | -      | -                       | -      | 0.86 (0.63, 1.18)           | 0.34 | 0.99 (0.62, 1.60)                                      | 0.98 |
| Niger 2012 DHS        | -                              | -      | -                       | -      | 0.91 (0.69, 1.22)           | 0.54 | 1.17 (0.66, 2.08)                                      | 0.58 |
| Nigeria 2008 DHS      | -                              | -      | -                       | -      | 0.51 (0.14, 1.79)           | 0.29 | -                                                      | -    |
| Nigeria 2010 MIS      | 1.00 (0.81, 1.25)              | 0.97   | 0.80 (0.64, 1.00)       | 0.05   | -                           | -    | -                                                      | -    |
| Nigeria 2013 DHS      | -                              | -      | -                       | -      | 0.71 (0.37, 1.36)           | 0.30 | -                                                      | -    |
| Nigeria 2015 MIS      | 0.86 (0.70, 1.05)              | 0.14   | 0.91 (0.75, 1.11)       | 0.35   | -                           | -    | -                                                      | -    |
| Rwanda 2010 DHS       | 0.65 (0.35, 1.23)              | 0.19   | 0.63 (0.39, 1.01)       | 0.05   | 1.03 (0.83, 1.28)           | 0.77 | 0.86 (0.59, 1.24)                                      | 0.41 |
| Rwanda 2015 DHS       | 0.43 (0.19, 0.95)              | 0.04   | 0.31 (0.20, 0.49)       | <0.001 | 0.88 (0.71, 1.08)           | 0.22 | 0.90 (0.66, 1.22)                                      | 0.48 |
| Rwanda 2017 MIS       | 0.44 (0.29, 0.69)              | <0.001 | 0.46 (0.32, 0.68)       | <0.001 | -                           | -    | -                                                      | -    |
| Senegal 2008 MIS      | 0.75 (0.48, 1.18)              | 0.21   | 1.07 (0.76, 1.51)       | 0.71   | -                           | -    | -                                                      | -    |
| Senegal 2010 DHS      | 1.36 (0.82, 2.25)              | 0.23   | 0.83 (0.49, 1.41)       | 0.49   | 1.05 (0.85, 1.30)           | 0.66 | 1.09 (0.64, 1.83)                                      | 0.76 |
| Senegal 2012 DHS      | 0.71 (0.48, 1.05)              | 0.08   | 0.74 (0.52, 1.06)       | 0.10   | 0.95 (0.70, 1.29)           | 0.73 | -                                                      | -    |
| Senegal 2014 DHS      | 0.83 (0.49, 1.39)              | 0.47   | 0.75 (0.44, 1.26)       | 0.27   | 0.71 (0.53, 0.96)           | 0.02 | -                                                      | -    |
| Senegal 2015 DHS      | 0.92 (0.35, 2.37)              | 0.86   | 1.01 (0.57, 1.78)       | 0.99   | 0.73 (0.54, 0.99)           | 0.04 | -                                                      | -    |
| Senegal 2016 DHS      | 1.18 (0.68, 2.06)              | 0.56   | 1.29 (0.80, 2.08)       | 0.30   | 1.45 (1.03, 2.03)           | 0.03 | -                                                      | -    |
| Sierra Leone 2008 DHS | -                              | -      | -                       | -      | 0.62 (0.27, 1.39)           | 0.25 | -                                                      | -    |
| Sierra Leone 2013 DHS | -                              | -      | -                       | -      | 0.95 (0.74, 1.23)           | 0.71 | 0.74 (0.46, 1.19)                                      | 0.21 |
| Sierra Leone 2016 MIS | 0.94 (0.83, 1.06)              | 0.31   | 0.87 (0.76, 0.99)       | 0.04   | -                           | -    | -                                                      | -    |
| Tanzania 2004 DHS     | -                              | -      | -                       | -      | 1.24 (0.92, 1.68)           | 0.16 | -                                                      | -    |
| Tanzania 2010 DHS     | -                              | -      | -                       | -      | 0.98 (0.73, 1.30)           | 0.87 | 1.06 (0.63, 1.80)                                      | 0.82 |
| Tanzania 2012 AIS     | 0.70 (0.50, 0.97)              | 0.03   | 0.66 (0.52, 0.86)       | 0.002  | -                           | -    | -                                                      | -    |
| Tanzania 2017 MIS     | -                              | -      | 0.71 (0.55, 0.90)       | 0.005  | -                           | -    | -                                                      | -    |
| Togo 2013 DHS         | 1.01 (0.82, 1.25)              | 0.91   | 0.92 (0.74, 1.15)       | 0.47   | 1.12 (0.81, 1.56)           | 0.48 | 0.93 (0.51, 1.72)                                      | 0.83 |

**Table F.** Association between finished house construction materials and malaria, diarrhoea and acute respiratory infection in children aged 0-5 years in sub-Saharan Africa (crude results)

| Survey            | Malaria positive by microscopy |        | Malaria positive by RDT |        | Diarrhoea in past two weeks |      | Cough with short and rapid breathing in past two weeks |      |
|-------------------|--------------------------------|--------|-------------------------|--------|-----------------------------|------|--------------------------------------------------------|------|
|                   | OR (95% CI)                    | p      | OR (95% CI)             | p      | OR (95% CI)                 | p    | OR (95% CI)                                            | p    |
| Uganda 2006 DHS   | -                              | -      | -                       | -      | 1.03 (0.66, 1.59)           | 0.90 | 0.55 (0.26, 1.18)                                      | 0.12 |
| Uganda 2009 MIS   | 0.65 (0.52, 0.81)              | <0.001 | 0.64 (0.51, 0.79)       | <0.001 | -                           | -    | -                                                      | -    |
| Uganda 2014 MIS   | 0.80 (0.63, 1.02)              | 0.07   | 0.75 (0.59, 0.94)       | 0.01   | -                           | -    | -                                                      | -    |
| Uganda 2016 DHS   | -                              | -      | 0.55 (0.44, 0.68)       | <0.001 | 1.14 (0.95, 1.38)           | 0.16 | 1.14 (0.90, 1.43)                                      | 0.28 |
| Zambia 2007 DHS   | -                              | -      | -                       | -      | 1.24 (0.73, 2.11)           | 0.42 | 0.47 (0.13, 1.65)                                      | 0.24 |
| Zambia 2013 DHS   | -                              | -      | -                       | -      | 1.02 (0.85, 1.23)           | 0.82 | 1.40 (0.98, 2.01)                                      | 0.07 |
| Zimbabwe 2005 DHS | -                              | -      | -                       | -      | 1.04 (0.74, 1.47)           | 0.81 | 1.06 (0.56, 2.03)                                      | 0.85 |
| Zimbabwe 2010 DHS | -                              | -      | -                       | -      | 0.89 (0.65, 1.23)           | 0.48 | 1.21 (0.70, 2.10)                                      | 0.50 |
| Zimbabwe 2015 DHS | -                              | -      | -                       | -      | 0.98 (0.72, 1.35)           | 0.92 | 1.15 (0.74, 1.78)                                      | 0.54 |

AIS: AIDS Indicator Survey; CI: confidence intervals; DHS: Demographic and Health Survey; DRC: Democratic Republic of the Congo; MIS: Malaria Indicator Survey; OR: Odds Ratio; RDT: rapid diagnostic test. All p-values are calculated using the likelihood ratio test.

**Table G.** Association between finished house construction materials, growth failure and anaemia in children aged 0-5 years in sub-Saharan Africa (crude results)

| Survey                 | Low height-for-age |        | Low weight-for-height |      | Low weight-for-age |        | Any anaemia       |       | Moderate to severe anaemia |       |
|------------------------|--------------------|--------|-----------------------|------|--------------------|--------|-------------------|-------|----------------------------|-------|
|                        | OR (95% CI)        | p      | OR (95% CI)           | p    | OR (95% CI)        | p      | OR (95% CI)       | p     | OR (95% CI)                | p     |
| Angola 2011 MIS        | -                  | -      | -                     | -    | -                  | -      | -                 | -     | -                          | -     |
| Angola 2015 DHS        | 0.87 (0.62, 1.22)  | 0.42   | 0.78 (0.37, 1.64)     | 0.51 | 0.69 (0.47, 1.02)  | 0.06   | -                 | -     | -                          | -     |
| Benin 2001 DHS         | -                  | -      | -                     | -    | -                  | -      | -                 | -     | -                          | -     |
| Benin 2006 DHS         | 0.77 (0.67, 0.90)  | <0.001 | 1.07 (0.81, 1.42)     | 0.63 | 0.74 (0.63, 0.88)  | <0.001 | 0.80 (0.56, 1.14) | 0.21  | 0.82 (0.60, 1.11)          | 0.20  |
| Benin 2012 DHS         | 0.81 (0.68, 0.96)  | 0.02   | 0.88 (0.70, 1.10)     | 0.26 | 0.85 (0.70, 1.03)  | 0.09   | 0.99 (0.68, 1.43) | 0.95  | 1.33 (0.92, 1.91)          | 0.13  |
| Burkina Faso 2010 DHS  | 0.95 (0.78, 1.15)  | 0.59   | 0.86 (0.66, 1.11)     | 0.25 | 0.98 (0.80, 1.19)  | 0.83   | 0.64 (0.47, 0.87) | 0.005 | 0.80 (0.65, 0.99)          | 0.04  |
| Burkina Faso 2014 MIS  | -                  | -      | -                     | -    | -                  | -      | -                 | -     | -                          | -     |
| Burundi 2010 DHS       | 0.70 (0.54, 0.91)  | 0.008  | 0.90 (0.50, 1.62)     | 0.73 | 0.63 (0.48, 0.84)  | 0.001  | 1.06 (0.80, 1.40) | 0.68  | 0.99 (0.70, 1.39)          | 0.94  |
| Burundi 2012 MIS       | -                  | -      | -                     | -    | -                  | -      | -                 | -     | -                          | -     |
| Burundi 2016 DHS       | 0.70 (0.57, 0.85)  | <0.001 | 1.11 (0.71, 1.71)     | 0.65 | 0.64 (0.52, 0.79)  | <0.001 | 0.75 (0.59, 0.94) | 0.01  | 0.69 (0.54, 0.87)          | 0.002 |
| Cameroon 2011 DHS      | 0.70 (0.52, 0.94)  | 0.02   | 1.17 (0.59, 2.32)     | 0.65 | 0.86 (0.58, 1.29)  | 0.47   | 1.16 (0.83, 1.61) | 0.40  | 0.84 (0.60, 1.19)          | 0.33  |
| Comoros 2012 DHS       | 0.67 (0.44, 1.03)  | 0.07   | 0.81 (0.44, 1.49)     | 0.49 | 0.88 (0.55, 1.43)  | 0.61   | -                 | -     | -                          | -     |
| Congo 2005 DHS         | 0.71 (0.54, 0.93)  | 0.01   | 1.14 (0.74, 1.77)     | 0.55 | 0.84 (0.62, 1.15)  | 0.28   | 1.04 (0.72, 1.48) | 0.85  | 0.74 (0.52, 1.04)          | 0.08  |
| Congo 2011 DHS         | 0.73 (0.57, 0.93)  | 0.01   | 0.83 (0.52, 1.31)     | 0.42 | 0.75 (0.57, 0.99)  | 0.04   | 0.97 (0.77, 1.23) | 0.82  | 1.14 (0.90, 1.45)          | 0.28  |
| DRC 2013 DHS           | 0.81 (0.64, 1.01)  | 0.06   | 1.12 (0.70, 1.78)     | 0.64 | 0.83 (0.64, 1.07)  | 0.14   | 0.96 (0.75, 1.23) | 0.74  | 0.96 (0.75, 1.24)          | 0.77  |
| Cote d'Ivoire 2012 DHS | 0.92 (0.60, 1.41)  | 0.70   | 0.68 (0.33, 1.42)     | 0.31 | 0.68 (0.44, 1.06)  | 0.09   | 0.85 (0.52, 1.40) | 0.52  | 0.97 (0.65, 1.46)          | 0.90  |
| Eswatini 2006 DHS      | 0.57 (0.39, 0.85)  | 0.006  | 0.82 (0.25, 2.71)     | 0.75 | 0.46 (0.24, 0.86)  | 0.01   | 0.96 (0.67, 1.38) | 0.83  | 1.03 (0.67, 1.59)          | 0.89  |
| Ethiopia 2016 DHS      | -                  | -      | -                     | -    | -                  | -      | -                 | -     | -                          | -     |
| Gabon 2012 DHS         | 0.90 (0.65, 1.23)  | 0.51   | 1.37 (0.61, 3.09)     | 0.45 | 1.19 (0.78, 1.81)  | 0.41   | 1.05 (0.78, 1.41) | 0.76  | 0.89 (0.66, 1.18)          | 0.42  |
| Gambia 2013 DHS        | 0.60 (0.39, 0.92)  | 0.02   | 0.72 (0.41, 1.28)     | 0.27 | 0.97 (0.65, 1.46)  | 0.89   | 0.76 (0.48, 1.19) | 0.23  | 0.90 (0.62, 1.30)          | 0.56  |
| Ghana 2008 DHS         | 0.82 (0.34, 1.95)  | 0.65   | 0.41 (0.13, 1.34)     | 0.14 | 0.45 (0.17, 1.22)  | 0.12   | 1.23 (0.30, 5.12) | 0.77  | 0.40 (0.12, 1.36)          | 0.14  |
| Ghana 2014 DHS         | 0.56 (0.27, 1.13)  | 0.10   | 1.15 (0.42, 3.16)     | 0.79 | 0.68 (0.37, 1.26)  | 0.22   | 0.99 (0.52, 1.89) | 0.98  | 0.70 (0.40, 1.24)          | 0.23  |
| Ghana 2016 MIS         | -                  | -      | -                     | -    | -                  | -      | -                 | -     | -                          | -     |
| Guinea 2012 DHS        | 1.19 (0.74, 1.90)  | 0.48   | 1.24 (0.64, 2.40)     | 0.52 | 1.37 (0.85, 2.20)  | 0.20   | 0.76 (0.47, 1.22) | 0.25  | 1.00 (0.66, 1.51)          | 1.00  |
| Kenya 2008 DHS         | 0.76 (0.55, 1.06)  | 0.10   | 0.70 (0.38, 1.32)     | 0.27 | 0.72 (0.49, 1.05)  | 0.09   | -                 | -     | -                          | -     |
| Kenya 2014 DHS         | 0.71 (0.55, 0.91)  | 0.007  | 0.89 (0.52, 1.54)     | 0.69 | 0.67 (0.50, 0.90)  | 0.007  | -                 | -     | -                          | -     |
| Kenya 2015 MIS         | -                  | -      | -                     | -    | -                  | -      | -                 | -     | -                          | -     |
| Lesotho 2009 DHS       | -                  | -      | -                     | -    | -                  | -      | -                 | -     | -                          | -     |
| Lesotho 2014 DHS       | -                  | -      | -                     | -    | -                  | -      | -                 | -     | -                          | -     |
| Liberia 2011 MIS       | -                  | -      | -                     | -    | -                  | -      | -                 | -     | -                          | -     |
| Liberia 2013 DHS       | 0.54 (0.28, 1.05)  | 0.07   | 2.48 (0.77, 7.93)     | 0.13 | 0.94 (0.45, 1.95)  | 0.86   | -                 | -     | -                          | -     |
| Liberia 2016 MIS       | -                  | -      | -                     | -    | -                  | -      | -                 | -     | -                          | -     |
| Madagascar 2008 DHS    | 0.60 (0.43, 0.85)  | 0.004  | -                     | -    | -                  | -      | 0.86 (0.51, 1.46) | 0.58  | 1.99 (0.95, 4.19)          | 0.07  |
| Madagascar 2011 MIS    | -                  | -      | -                     | -    | -                  | -      | -                 | -     | -                          | -     |

**Table G.** Association between finished house construction materials, growth failure and anaemia in children aged 0-5 years in sub-Saharan Africa (crude results)

| Survey                | Low height-for-age |        | Low weight-for-height |      | Low weight-for-age |        | Any anaemia       |      | Moderate to severe anaemia |        |
|-----------------------|--------------------|--------|-----------------------|------|--------------------|--------|-------------------|------|----------------------------|--------|
|                       | OR (95% CI)        | p      | OR (95% CI)           | p    | OR (95% CI)        | p      | OR (95% CI)       | p    | OR (95% CI)                | p      |
| Madagascar 2013 MIS   | -                  | -      | -                     | -    | -                  | -      | -                 | -    | -                          | -      |
| Malawi 2010 DHS       | 0.91 (0.72, 1.15)  | 0.43   | 0.47 (0.24, 0.90)     | 0.02 | 0.76 (0.55, 1.05)  | 0.10   | 0.77 (0.61, 0.99) | 0.04 | 0.72 (0.56, 0.93)          | 0.01   |
| Malawi 2012 MIS       | -                  | -      | -                     | -    | -                  | -      | -                 | -    | -                          | -      |
| Malawi 2014 MIS       | -                  | -      | -                     | -    | -                  | -      | -                 | -    | -                          | -      |
| Malawi 2015 DHS       | 0.65 (0.50, 0.85)  | 0.001  | 0.99 (0.51, 1.93)     | 0.98 | 1.08 (0.80, 1.46)  | 0.60   | 0.81 (0.61, 1.07) | 0.14 | 0.90 (0.70, 1.17)          | 0.45   |
| Malawi 2017 MIS       | -                  | -      | -                     | -    | -                  | -      | -                 | -    | -                          | -      |
| Mali 2012 DHS         | 1.19 (0.71, 1.99)  | 0.51   | 2.19 (0.88, 5.46)     | 0.09 | 1.17 (0.69, 1.99)  | 0.56   | 0.84 (0.49, 1.43) | 0.52 | 0.74 (0.47, 1.18)          | 0.21   |
| Mali 2015 MIS         | -                  | -      | -                     | -    | -                  | -      | -                 | -    | -                          | -      |
| Mozambique 2011 DHS   | 0.80 (0.65, 0.99)  | 0.04   | 0.73 (0.44, 1.22)     | 0.23 | 0.72 (0.54, 0.96)  | 0.02   | 0.76 (0.56, 1.02) | 0.07 | 0.71 (0.52, 0.97)          | 0.03   |
| Mozambique 2015 AIS   | -                  | -      | -                     | -    | -                  | -      | -                 | -    | -                          | -      |
| Namibia 2006 DHS      | 0.58 (0.40, 0.83)  | 0.003  | 0.94 (0.52, 1.70)     | 0.84 | 0.83 (0.57, 1.20)  | 0.32   | -                 | -    | -                          | -      |
| Namibia 2013 DHS      | 0.56 (0.32, 0.97)  | 0.04   | 0.84 (0.37, 1.90)     | 0.68 | 0.42 (0.23, 0.75)  | 0.003  | 0.92 (0.57, 1.50) | 0.74 | 0.87 (0.50, 1.52)          | 0.62   |
| Niger 2012 DHS        | 0.76 (0.48, 1.21)  | 0.25   | 0.51 (0.29, 0.92)     | 0.03 | 0.84 (0.54, 1.29)  | 0.42   | 0.83 (0.52, 1.33) | 0.44 | 1.07 (0.70, 1.65)          | 0.76   |
| Nigeria 2008 DHS      | 0.70 (0.39, 1.27)  | 0.24   | 0.80 (0.30, 2.11)     | 0.65 | 0.66 (0.35, 1.24)  | 0.20   | -                 | -    | -                          | -      |
| Nigeria 2010 MIS      | -                  | -      | -                     | -    | -                  | -      | -                 | -    | -                          | -      |
| Nigeria 2013 DHS      | 0.60 (0.35, 1.01)  | 0.06   | 0.82 (0.46, 1.45)     | 0.49 | 0.48 (0.29, 0.79)  | 0.004  | -                 | -    | -                          | -      |
| Nigeria 2015 MIS      | -                  | -      | -                     | -    | -                  | -      | -                 | -    | -                          | -      |
| Rwanda 2010 DHS       | 0.61 (0.48, 0.77)  | <0.001 | 0.60 (0.29, 1.24)     | 0.17 | 0.57 (0.41, 0.79)  | <0.001 | 0.81 (0.63, 1.03) | 0.08 | 0.79 (0.57, 1.09)          | 0.15   |
| Rwanda 2015 DHS       | 0.64 (0.51, 0.81)  | <0.001 | 0.62 (0.27, 1.42)     | 0.26 | 0.51 (0.36, 0.72)  | <0.001 | 0.86 (0.69, 1.08) | 0.20 | 0.67 (0.49, 0.92)          | 0.01   |
| Rwanda 2017 MIS       | -                  | -      | -                     | -    | -                  | -      | -                 | -    | -                          | -      |
| Senegal 2008 MIS      | -                  | -      | -                     | -    | -                  | -      | -                 | -    | -                          | -      |
| Senegal 2010 DHS      | 0.84 (0.56, 1.26)  | 0.41   | 1.72 (0.87, 3.40)     | 0.12 | 0.86 (0.56, 1.30)  | 0.47   | 0.93 (0.59, 1.48) | 0.77 | 0.95 (0.65, 1.38)          | 0.77   |
| Senegal 2012 DHS      | 0.95 (0.69, 1.30)  | 0.74   | 0.78 (0.52, 1.18)     | 0.24 | 0.69 (0.52, 0.91)  | 0.009  | 0.84 (0.63, 1.12) | 0.24 | 0.90 (0.69, 1.17)          | 0.42   |
| Senegal 2014 DHS      | 0.80 (0.57, 1.13)  | 0.20   | 0.73 (0.43, 1.23)     | 0.24 | 0.78 (0.57, 1.08)  | 0.13   | 1.07 (0.80, 1.43) | 0.65 | 1.06 (0.79, 1.41)          | 0.71   |
| Senegal 2015 DHS      | 0.70 (0.49, 0.98)  | 0.04   | 0.84 (0.53, 1.34)     | 0.46 | 0.80 (0.59, 1.09)  | 0.16   | 1.10 (0.80, 1.52) | 0.54 | 0.96 (0.72, 1.28)          | 0.80   |
| Senegal 2016 DHS      | 1.04 (0.70, 1.53)  | 0.86   | 1.34 (0.81, 2.22)     | 0.25 | 1.06 (0.76, 1.48)  | 0.74   | 0.75 (0.54, 1.05) | 0.10 | 0.73 (0.55, 0.98)          | 0.03   |
| Sierra Leone 2008 DHS | 0.63 (0.36, 1.11)  | 0.11   | 0.64 (0.21, 1.95)     | 0.43 | 0.68 (0.36, 1.27)  | 0.23   | 0.61 (0.19, 2.00) | 0.41 | 0.85 (0.31, 2.34)          | 0.76   |
| Sierra Leone 2013 DHS | 1.19 (0.88, 1.61)  | 0.26   | 0.67 (0.38, 1.18)     | 0.17 | 1.06 (0.75, 1.51)  | 0.73   | 0.97 (0.65, 1.45) | 0.88 | 1.05 (0.77, 1.43)          | 0.77   |
| Sierra Leone 2016 MIS | -                  | -      | -                     | -    | -                  | -      | -                 | -    | -                          | -      |
| Tanzania 2004 DHS     | 0.69 (0.54, 0.88)  | 0.003  | 0.96 (0.50, 1.83)     | 0.90 | 0.66 (0.50, 0.87)  | 0.004  | 0.79 (0.63, 1.00) | 0.05 | 0.65 (0.52, 0.82)          | <0.001 |
| Tanzania 2010 DHS     | 0.87 (0.70, 1.08)  | 0.21   | 1.05 (0.64, 1.71)     | 0.85 | 1.00 (0.77, 1.31)  | 0.98   | 1.18 (0.96, 1.46) | 0.11 | 1.16 (0.92, 1.47)          | 0.22   |
| Tanzania 2012 AIS     | -                  | -      | -                     | -    | -                  | -      | -                 | -    | -                          | -      |
| Tanzania 2017 MIS     | -                  | -      | -                     | -    | -                  | -      | -                 | -    | -                          | -      |
| Togo 2013 DHS         | 0.58 (0.38, 0.88)  | 0.01   | 0.53 (0.26, 1.09)     | 0.09 | 0.67 (0.43, 1.05)  | 0.08   | 0.90 (0.59, 1.37) | 0.62 | 0.80 (0.54, 1.19)          | 0.27   |

**Table G.** Association between finished house construction materials, growth failure and anaemia in children aged 0-5 years in sub-Saharan Africa (crude results)

| Survey            | Low height-for-age |      | Low weight-for-height |      | Low weight-for-age |        | Any anaemia       |      | Moderate to severe anaemia |      |
|-------------------|--------------------|------|-----------------------|------|--------------------|--------|-------------------|------|----------------------------|------|
|                   | OR (95% CI)        | p    | OR (95% CI)           | p    | OR (95% CI)        | p      | OR (95% CI)       | p    | OR (95% CI)                | p    |
| Uganda 2006 DHS   | 0.81 (0.42, 1.56)  | 0.53 | 0.39 (0.11, 1.34)     | 0.13 | 0.65 (0.29, 1.44)  | 0.28   | 0.28 (0.09, 0.83) | 0.02 | 0.37 (0.14, 0.97)          | 0.04 |
| Uganda 2009 MIS   | -                  | -    | -                     | -    | -                  | -      | -                 | -    | -                          | -    |
| Uganda 2014 MIS   | -                  | -    | -                     | -    | -                  | -      | -                 | -    | -                          | -    |
| Uganda 2016 DHS   | 0.53 (0.33, 0.86)  | 0.01 | 0.91 (0.38, 2.19)     | 0.84 | 0.74 (0.43, 1.27)  | 0.27   | 0.68 (0.46, 1.00) | 0.05 | 0.58 (0.38, 0.90)          | 0.01 |
| Zambia 2007 DHS   | 0.77 (0.58, 1.03)  | 0.08 | 1.03 (0.58, 1.83)     | 0.93 | 0.67 (0.47, 0.96)  | 0.03   | -                 | -    | -                          | -    |
| Zambia 2013 DHS   | 0.85 (0.73, 0.98)  | 0.03 | 0.85 (0.62, 1.18)     | 0.33 | 0.72 (0.60, 0.87)  | <0.001 | -                 | -    | -                          | -    |
| Zimbabwe 2005 DHS | 0.85 (0.65, 1.11)  | 0.24 | 1.19 (0.71, 1.99)     | 0.52 | 0.89 (0.64, 1.25)  | 0.50   | 1.02 (0.78, 1.34) | 0.88 | 1.18 (0.88, 1.58)          | 0.28 |
| Zimbabwe 2010 DHS | 0.73 (0.57, 0.94)  | 0.02 | 0.81 (0.42, 1.57)     | 0.54 | 0.71 (0.52, 0.98)  | 0.04   | 0.89 (0.70, 1.15) | 0.38 | 0.93 (0.71, 1.22)          | 0.60 |
| Zimbabwe 2015 DHS | 0.81 (0.59, 1.13)  | 0.21 | 1.09 (0.60, 1.98)     | 0.78 | 0.70 (0.47, 1.04)  | 0.08   | 0.96 (0.70, 1.31) | 0.79 | 1.48 (1.00, 2.19)          | 0.05 |

AIS: AIDS Indicator Survey; CI: confidence intervals; DHS: Demographic and Health Survey; DRC: Democratic Republic of the Congo; MIS: Malaria Indicator Survey; OR: Odds Ratio. All p-values are calculated using the likelihood ratio test.

**Table H.** Association between improved housing and malaria, diarrhoea and acute respiratory infection in children aged 0-5 years in sub-Saharan Africa (crude results)

| Survey                 | Malaria positive by microscopy |        | Malaria positive by RDT |        | Diarrhoea in past two weeks |       | Cough with short and rapid breathing in past two weeks |       |
|------------------------|--------------------------------|--------|-------------------------|--------|-----------------------------|-------|--------------------------------------------------------|-------|
|                        | OR (95% CI)                    | p      | OR (95% CI)             | p      | OR (95% CI)                 | p     | OR (95% CI)                                            | p     |
| Angola 2011 MIS        | 2.13 (0.79, 5.77)              | 0.14   | 0.17 (0.02, 1.35)       | 0.09   | -                           | -     | -                                                      | -     |
| Angola 2015 DHS        | -                              | -      | 0.69 (0.46, 1.03)       | 0.07   | -                           | -     | -                                                      | -     |
| Benin 2001 DHS         | -                              | -      | -                       | -      | -                           | -     | -                                                      | -     |
| Benin 2006 DHS         | -                              | -      | -                       | -      | 0.94 (0.63, 1.39)           | 0.75  | 1.43 (0.82, 2.51)                                      | 0.21  |
| Benin 2012 DHS         | 0.69 (0.45, 1.07)              | 0.10   | 0.61 (0.38, 0.99)       | 0.04   | 1.01 (0.68, 1.52)           | 0.95  | -                                                      | -     |
| Burkina Faso 2010 DHS  | 0.79 (0.61, 1.01)              | 0.06   | 0.89 (0.69, 1.15)       | 0.37   | 0.96 (0.79, 1.18)           | 0.72  | -                                                      | -     |
| Burkina Faso 2014 MIS  | 0.66 (0.52, 0.83)              | <0.001 | 0.71 (0.56, 0.89)       | 0.003  | -                           | -     | -                                                      | -     |
| Burundi 2010 DHS       | -                              | -      | -                       | -      | 0.85 (0.66, 1.11)           | 0.23  | 1.12 (0.69, 1.83)                                      | 0.65  |
| Burundi 2012 MIS       | 0.68 (0.45, 1.05)              | 0.08   | 0.55 (0.37, 0.84)       | 0.005  | -                           | -     | -                                                      | -     |
| Burundi 2016 DHS       | 0.89 (0.73, 1.09)              | 0.28   | 0.71 (0.58, 0.87)       | <0.001 | 0.95 (0.80, 1.12)           | 0.53  | 0.86 (0.69, 1.07)                                      | 0.18  |
| Cameroon 2011 DHS      | -                              | -      | 0.80 (0.66, 0.98)       | 0.03   | 0.67 (0.52, 0.86)           | 0.002 | 1.07 (0.77, 1.47)                                      | 0.70  |
| Comoros 2012 DHS       | -                              | -      | -                       | -      | 1.22 (0.81, 1.85)           | 0.34  | 7.34 (2.17, 24.78)                                     | 0.001 |
| Congo 2005 DHS         | -                              | -      | -                       | -      | 0.80 (0.50, 1.26)           | 0.33  | 0.80 (0.39, 1.64)                                      | 0.55  |
| Congo 2011 DHS         | -                              | -      | -                       | -      | 0.76 (0.57, 1.01)           | 0.06  | 1.17 (0.73, 1.88)                                      | 0.51  |
| DRC 2013 DHS           | 0.50 (0.31, 0.83)              | 0.01   | 0.63 (0.41, 0.99)       | 0.04   | 1.18 (0.90, 1.56)           | 0.23  | 0.93 (0.62, 1.40)                                      | 0.74  |
| Cote d'Ivoire 2012 DHS | 0.65 (0.45, 0.95)              | 0.03   | 0.69 (0.54, 0.90)       | 0.01   | 0.79 (0.61, 1.03)           | 0.08  | 0.60 (0.34, 1.05)                                      | 0.07  |
| Eswatini 2006 DHS      | -                              | -      | -                       | -      | 0.80 (0.45, 1.43)           | 0.45  | 1.05 (0.47, 2.35)                                      | 0.90  |
| Ethiopia 2016 DHS      | -                              | -      | -                       | -      | 0.49 (0.23, 1.05)           | 0.07  | 0.10 (0.01, 0.82)                                      | 0.03  |
| Gabon 2012 DHS         | -                              | -      | -                       | -      | 0.78 (0.61, 0.99)           | 0.04  | 1.30 (0.93, 1.81)                                      | 0.13  |
| Gambia 2013 DHS        | -                              | -      | 0.55 (0.21, 1.46)       | 0.23   | 1.09 (0.89, 1.33)           | 0.41  | -                                                      | -     |
| Ghana 2008 DHS         | -                              | -      | -                       | -      | 0.76 (0.31, 1.90)           | 0.56  | -                                                      | -     |
| Ghana 2014 DHS         | 0.75 (0.54, 1.05)              | 0.09   | 0.99 (0.72, 1.37)       | 0.96   | 0.94 (0.62, 1.42)           | 0.76  | 0.66 (0.21, 2.12)                                      | 0.49  |
| Ghana 2016 MIS         | 1.14 (0.80, 1.64)              | 0.47   | 0.71 (0.49, 1.03)       | 0.07   | -                           | -     | -                                                      | -     |
| Guinea 2012 DHS        | 1.04 (0.78, 1.39)              | 0.77   | 0.84 (0.63, 1.13)       | 0.25   | 0.90 (0.68, 1.19)           | 0.47  | 0.64 (0.35, 1.17)                                      | 0.15  |
| Kenya 2008 DHS         | -                              | -      | -                       | -      | 1.14 (0.63, 2.08)           | 0.66  | 1.09 (0.31, 3.88)                                      | 0.89  |
| Kenya 2014 DHS         | -                              | -      | -                       | -      | 0.71 (0.50, 1.01)           | 0.06  | 2.17 (1.23, 3.82)                                      | 0.01  |
| Kenya 2015 MIS         | -                              | -      | 0.31 (0.13, 0.78)       | 0.01   | -                           | -     | -                                                      | -     |
| Lesotho 2009 DHS       | -                              | -      | -                       | -      | 1.45 (0.44, 4.74)           | 0.54  | -                                                      | -     |
| Lesotho 2014 DHS       | -                              | -      | -                       | -      | 0.49 (0.30, 0.80)           | 0.005 | 0.73 (0.36, 1.49)                                      | 0.39  |
| Liberia 2011 MIS       | 1.24 (0.76, 2.05)              | 0.39   | 0.79 (0.50, 1.25)       | 0.31   | -                           | -     | -                                                      | -     |
| Liberia 2013 DHS       | -                              | -      | -                       | -      | 0.79 (0.44, 1.41)           | 0.42  | 0.51 (0.18, 1.41)                                      | 0.19  |
| Liberia 2016 MIS       | -                              | -      | 0.73 (0.49, 1.07)       | 0.10   | -                           | -     | -                                                      | -     |
| Madagascar 2008 DHS    | -                              | -      | -                       | -      | 0.60 (0.23, 1.56)           | 0.30  | -                                                      | -     |

**Table H.** Association between improved housing and malaria, diarrhoea and acute respiratory infection in children aged 0-5 years in sub-Saharan Africa (crude results)

| Survey                | Malaria positive by microscopy |       | Malaria positive by RDT |        | Diarrhoea in past two weeks |       | Cough with short and rapid breathing in past two weeks |      |
|-----------------------|--------------------------------|-------|-------------------------|--------|-----------------------------|-------|--------------------------------------------------------|------|
|                       | OR (95% CI)                    | p     | OR (95% CI)             | p      | OR (95% CI)                 | p     | OR (95% CI)                                            | p    |
| Madagascar 2011 MIS   | -                              | -     | -                       | -      | -                           | -     | -                                                      | -    |
| Madagascar 2013 MIS   | 3.37 (0.59, 19.21)             | 0.17  | 2.54 (0.46, 13.90)      | 0.28   | -                           | -     | -                                                      | -    |
| Malawi 2010 DHS       | -                              | -     | -                       | -      | 0.87 (0.65, 1.18)           | 0.37  | 0.84 (0.52, 1.36)                                      | 0.48 |
| Malawi 2012 MIS       | 0.25 (0.08, 0.73)              | 0.01  | 0.27 (0.12, 0.62)       | 0.002  | -                           | -     | -                                                      | -    |
| Malawi 2014 MIS       | 0.82 (0.36, 1.87)              | 0.64  | 0.72 (0.33, 1.55)       | 0.40   | -                           | -     | -                                                      | -    |
| Malawi 2015 DHS       | -                              | -     | -                       | -      | 0.88 (0.76, 1.01)           | 0.08  | 0.84 (0.68, 1.02)                                      | 0.08 |
| Malawi 2017 MIS       | 0.32 (0.15, 0.66)              | 0.002 | 0.43 (0.24, 0.76)       | 0.004  | -                           | -     | -                                                      | -    |
| Mali 2012 DHS         | 0.73 (0.54, 0.99)              | 0.04  | 0.86 (0.61, 1.21)       | 0.39   | 1.20 (0.86, 1.67)           | 0.28  | -                                                      | -    |
| Mali 2015 MIS         | 0.84 (0.67, 1.05)              | 0.12  | 0.68 (0.52, 0.89)       | 0.01   | -                           | -     | -                                                      | -    |
| Mozambique 2011 DHS   | 0.39 (0.21, 0.73)              | 0.003 | 0.47 (0.26, 0.83)       | 0.01   | 1.03 (0.74, 1.44)           | 0.86  | -                                                      | -    |
| Mozambique 2015 AIS   | -                              | -     | 0.75 (0.40, 1.38)       | 0.35   | -                           | -     | -                                                      | -    |
| Namibia 2006 DHS      | -                              | -     | -                       | -      | 0.83 (0.50, 1.36)           | 0.46  | 1.27 (0.35, 4.54)                                      | 0.71 |
| Namibia 2013 DHS      | -                              | -     | -                       | -      | 0.96 (0.69, 1.34)           | 0.81  | 0.51 (0.31, 0.86)                                      | 0.01 |
| Niger 2012 DHS        | -                              | -     | -                       | -      | 0.96 (0.70, 1.31)           | 0.78  | 1.39 (0.78, 2.49)                                      | 0.26 |
| Nigeria 2008 DHS      | -                              | -     | -                       | -      | 0.57 (0.26, 1.24)           | 0.16  | -                                                      | -    |
| Nigeria 2010 MIS      | 1.01 (0.78, 1.31)              | 0.94  | 0.71 (0.54, 0.92)       | 0.01   | -                           | -     | -                                                      | -    |
| Nigeria 2013 DHS      | -                              | -     | -                       | -      | 0.93 (0.67, 1.29)           | 0.65  | -                                                      | -    |
| Nigeria 2015 MIS      | 0.94 (0.71, 1.25)              | 0.69  | 0.86 (0.69, 1.08)       | 0.20   | -                           | -     | -                                                      | -    |
| Rwanda 2010 DHS       | 1.43 (0.62, 3.33)              | 0.40  | 1.09 (0.55, 2.16)       | 0.81   | 0.98 (0.78, 1.25)           | 0.90  | 0.93 (0.62, 1.42)                                      | 0.75 |
| Rwanda 2015 DHS       | 0.31 (0.07, 1.42)              | 0.13  | 0.35 (0.17, 0.73)       | 0.005  | 0.66 (0.51, 0.87)           | 0.003 | 0.79 (0.55, 1.13)                                      | 0.19 |
| Rwanda 2017 MIS       | 0.41 (0.24, 0.70)              | 0.001 | 0.41 (0.26, 0.64)       | <0.001 | -                           | -     | -                                                      | -    |
| Senegal 2008 MIS      | 0.62 (0.26, 1.47)              | 0.28  | 0.89 (0.57, 1.40)       | 0.62   | -                           | -     | -                                                      | -    |
| Senegal 2010 DHS      | 0.91 (0.45, 1.85)              | 0.80  | 0.84 (0.42, 1.66)       | 0.62   | 1.04 (0.87, 1.26)           | 0.65  | 0.99 (0.68, 1.45)                                      | 0.96 |
| Senegal 2012 DHS      | 1.52 (0.76, 3.04)              | 0.23  | 0.96 (0.52, 1.77)       | 0.89   | 0.79 (0.58, 1.08)           | 0.14  | -                                                      | -    |
| Senegal 2014 DHS      | 0.47 (0.08, 2.87)              | 0.41  | 1.18 (0.30, 4.68)       | 0.81   | 0.77 (0.59, 1.00)           | 0.05  | -                                                      | -    |
| Senegal 2015 DHS      | 0.33 (0.07, 1.58)              | 0.17  | 0.88 (0.17, 4.44)       | 0.88   | 0.92 (0.72, 1.19)           | 0.55  | -                                                      | -    |
| Senegal 2016 DHS      | 1.12 (0.29, 4.39)              | 0.87  | 1.51 (0.39, 5.80)       | 0.55   | 0.93 (0.69, 1.25)           | 0.62  | -                                                      | -    |
| Sierra Leone 2008 DHS | -                              | -     | -                       | -      | 0.82 (0.31, 2.19)           | 0.70  | -                                                      | -    |
| Sierra Leone 2013 DHS | -                              | -     | -                       | -      | 0.94 (0.68, 1.29)           | 0.68  | 1.01 (0.60, 1.69)                                      | 0.98 |
| Sierra Leone 2016 MIS | 0.96 (0.81, 1.14)              | 0.66  | 0.96 (0.81, 1.15)       | 0.68   | -                           | -     | -                                                      | -    |
| Tanzania 2004 DHS     | -                              | -     | -                       | -      | -                           | -     | -                                                      | -    |
| Tanzania 2010 DHS     | -                              | -     | -                       | -      | 0.89 (0.60, 1.31)           | 0.56  | 0.69 (0.32, 1.46)                                      | 0.33 |
| Tanzania 2012 AIS     | 0.70 (0.27, 1.81)              | 0.46  | 0.94 (0.50, 1.77)       | 0.84   | -                           | -     | -                                                      | -    |

**Table H.** Association between improved housing and malaria, diarrhoea and acute respiratory infection in children aged 0-5 years in sub-Saharan Africa (crude results)

| Survey            | Malaria positive by microscopy |       | Malaria positive by RDT |      | Diarrhoea in past two weeks |      | Cough with short and rapid breathing in past two weeks |      |
|-------------------|--------------------------------|-------|-------------------------|------|-----------------------------|------|--------------------------------------------------------|------|
|                   | OR (95% CI)                    | p     | OR (95% CI)             | p    | OR (95% CI)                 | p    | OR (95% CI)                                            | p    |
| Tanzania 2017 MIS | -                              | -     | 0.53 (0.31, 0.88)       | 0.02 | -                           | -    | -                                                      | -    |
| Togo 2013 DHS     | 0.54 (0.36, 0.79)              | 0.002 | 0.60 (0.41, 0.89)       | 0.01 | 0.81 (0.56, 1.18)           | 0.28 | 0.99 (0.60, 1.65)                                      | 0.98 |
| Uganda 2006 DHS   | -                              | -     | -                       | -    | 0.76 (0.34, 1.67)           | 0.49 | 0.44 (0.13, 1.52)                                      | 0.19 |
| Uganda 2009 MIS   | 0.57 (0.38, 0.86)              | 0.01  | 0.61 (0.42, 0.90)       | 0.01 | -                           | -    | -                                                      | -    |
| Uganda 2014 MIS   | 0.66 (0.38, 1.15)              | 0.14  | 0.73 (0.46, 1.16)       | 0.18 | -                           | -    | -                                                      | -    |
| Uganda 2016 DHS   | -                              | -     | 0.66 (0.45, 0.96)       | 0.03 | 0.79 (0.60, 1.03)           | 0.08 | 0.92 (0.66, 1.28)                                      | 0.62 |
| Zambia 2007 DHS   | -                              | -     | -                       | -    | 1.22 (0.72, 2.09)           | 0.46 | 0.79 (0.19, 3.29)                                      | 0.74 |
| Zambia 2013 DHS   | -                              | -     | -                       | -    | 0.79 (0.64, 0.99)           | 0.04 | 1.24 (0.80, 1.91)                                      | 0.33 |
| Zimbabwe 2005 DHS | -                              | -     | -                       | -    | 1.24 (0.89, 1.73)           | 0.20 | 0.68 (0.35, 1.32)                                      | 0.26 |
| Zimbabwe 2010 DHS | -                              | -     | -                       | -    | 0.91 (0.68, 1.21)           | 0.51 | 1.11 (0.61, 2.02)                                      | 0.74 |
| Zimbabwe 2015 DHS | -                              | -     | -                       | -    | 0.69 (0.53, 0.90)           | 0.01 | 0.78 (0.52, 1.17)                                      | 0.23 |

AIS: AIDS Indicator Survey; CI: confidence intervals; DHS: Demographic and Health Survey; DRC: Democratic Republic of the Congo; MIS: Malaria Indicator Survey; OR: Odds Ratio; RDT: rapid diagnostic test. All p-values are calculated using the likelihood ratio test.



**Table I.** Association between improved housing, growth failure and anaemia in children aged 0-5 years in sub-Saharan Africa (crude results)

| Survey                 | Low height-for-age |        | Low weight-for-height |      | Low weight-for-age |       | Any anaemia       |       | Moderate to severe anaemia |      |
|------------------------|--------------------|--------|-----------------------|------|--------------------|-------|-------------------|-------|----------------------------|------|
|                        | OR (95% CI)        | p      | OR (95% CI)           | p    | OR (95% CI)        | p     | OR (95% CI)       | p     | OR (95% CI)                | p    |
| Angola 2011 MIS        | -                  | -      | -                     | -    | -                  | -     | -                 | -     | -                          | -    |
| Angola 2015 DHS        | 0.74 (0.47, 1.15)  | 0.18   | 0.71 (0.30, 1.67)     | 0.43 | 0.75 (0.47, 1.19)  | 0.23  | -                 | -     | -                          | -    |
| Benin 2001 DHS         | -                  | -      | -                     | -    | -                  | -     | -                 | -     | -                          | -    |
| Benin 2006 DHS         | 0.88 (0.69, 1.14)  | 0.34   | 0.60 (0.36, 1.02)     | 0.06 | 0.87 (0.64, 1.18)  | 0.37  | 0.67 (0.40, 1.11) | 0.12  | 0.61 (0.37, 1.00)          | 0.05 |
| Benin 2012 DHS         | 0.61 (0.47, 0.79)  | <0.001 | 0.85 (0.59, 1.23)     | 0.39 | 0.70 (0.52, 0.96)  | 0.02  | 0.97 (0.57, 1.65) | 0.90  | 1.16 (0.63, 2.11)          | 0.63 |
| Burkina Faso 2010 DHS  | 0.76 (0.57, 1.02)  | 0.06   | 0.83 (0.58, 1.20)     | 0.33 | 0.73 (0.55, 0.97)  | 0.03  | 0.85 (0.62, 1.17) | 0.32  | 0.87 (0.67, 1.12)          | 0.27 |
| Burkina Faso 2014 MIS  | -                  | -      | -                     | -    | -                  | -     | -                 | -     | -                          | -    |
| Burundi 2010 DHS       | 0.60 (0.41, 0.87)  | 0.01   | 0.64 (0.27, 1.50)     | 0.30 | 0.62 (0.41, 0.94)  | 0.02  | 0.79 (0.54, 1.16) | 0.22  | 0.70 (0.42, 1.17)          | 0.17 |
| Burundi 2012 MIS       | -                  | -      | -                     | -    | -                  | -     | -                 | -     | -                          | -    |
| Burundi 2016 DHS       | 0.70 (0.54, 0.89)  | 0.004  | 0.90 (0.52, 1.56)     | 0.70 | 0.67 (0.51, 0.86)  | 0.002 | 0.70 (0.54, 0.90) | 0.01  | 0.76 (0.57, 1.00)          | 0.05 |
| Cameroon 2011 DHS      | 0.81 (0.60, 1.10)  | 0.18   | 1.15 (0.56, 2.38)     | 0.70 | 1.06 (0.71, 1.58)  | 0.78  | 0.84 (0.64, 1.11) | 0.23  | 0.90 (0.66, 1.23)          | 0.49 |
| Comoros 2012 DHS       | 0.81 (0.53, 1.25)  | 0.35   | 0.76 (0.43, 1.34)     | 0.34 | 0.98 (0.61, 1.59)  | 0.94  | -                 | -     | -                          | -    |
| Congo 2005 DHS         | 0.67 (0.43, 1.04)  | 0.07   | 0.76 (0.37, 1.56)     | 0.46 | 0.66 (0.35, 1.27)  | 0.22  | 0.65 (0.42, 0.99) | 0.05  | 0.51 (0.30, 0.85)          | 0.01 |
| Congo 2011 DHS         | 0.65 (0.39, 1.08)  | 0.10   | 1.11 (0.57, 2.15)     | 0.76 | 0.74 (0.44, 1.24)  | 0.26  | 0.93 (0.65, 1.32) | 0.67  | 0.65 (0.45, 0.94)          | 0.02 |
| DRC 2013 DHS           | 0.73 (0.49, 1.09)  | 0.13   | 1.24 (0.60, 2.55)     | 0.56 | 0.56 (0.33, 0.94)  | 0.03  | 0.88 (0.62, 1.24) | 0.46  | 0.78 (0.53, 1.16)          | 0.22 |
| Cote d'Ivoire 2012 DHS | 0.69 (0.45, 1.04)  | 0.08   | 0.49 (0.23, 1.01)     | 0.05 | 0.66 (0.42, 1.02)  | 0.06  | 0.99 (0.69, 1.41) | 0.95  | 0.86 (0.61, 1.19)          | 0.36 |
| Eswatini 2006 DHS      | 0.49 (0.29, 0.85)  | 0.01   | 0.91 (0.23, 3.59)     | 0.90 | 0.23 (0.07, 0.79)  | 0.02  | 0.52 (0.33, 0.80) | 0.003 | 0.67 (0.39, 1.17)          | 0.16 |
| Ethiopia 2016 DHS      | -                  | -      | -                     | -    | -                  | -     | -                 | -     | -                          | -    |
| Gabon 2012 DHS         | 0.62 (0.43, 0.88)  | 0.01   | 1.03 (0.56, 1.87)     | 0.93 | 0.67 (0.42, 1.05)  | 0.08  | 0.86 (0.67, 1.11) | 0.24  | 0.82 (0.62, 1.09)          | 0.17 |
| Gambia 2013 DHS        | 0.97 (0.65, 1.45)  | 0.89   | 0.73 (0.44, 1.21)     | 0.22 | 0.85 (0.58, 1.24)  | 0.39  | 0.64 (0.46, 0.89) | 0.01  | 0.80 (0.59, 1.08)          | 0.15 |
| Ghana 2008 DHS         | 1.10 (0.55, 2.21)  | 0.78   | 1.72 (0.62, 4.74)     | 0.30 | 1.38 (0.64, 3.01)  | 0.41  | 1.40 (0.64, 3.07) | 0.40  | 1.24 (0.60, 2.55)          | 0.56 |
| Ghana 2014 DHS         | 0.68 (0.35, 1.30)  | 0.24   | 0.82 (0.34, 1.98)     | 0.67 | 0.56 (0.31, 1.02)  | 0.06  | 0.88 (0.56, 1.38) | 0.58  | 0.75 (0.47, 1.19)          | 0.22 |
| Ghana 2016 MIS         | -                  | -      | -                     | -    | -                  | -     | -                 | -     | -                          | -    |
| Guinea 2012 DHS        | 0.99 (0.65, 1.51)  | 0.96   | 1.58 (0.90, 2.80)     | 0.11 | 0.90 (0.57, 1.40)  | 0.63  | 0.78 (0.54, 1.13) | 0.18  | 0.87 (0.63, 1.21)          | 0.42 |
| Kenya 2008 DHS         | 0.74 (0.50, 1.11)  | 0.15   | 1.04 (0.52, 2.08)     | 0.91 | 0.69 (0.42, 1.13)  | 0.14  | -                 | -     | -                          | -    |
| Kenya 2014 DHS         | 0.53 (0.37, 0.77)  | <0.001 | 0.74 (0.35, 1.57)     | 0.43 | 0.69 (0.45, 1.05)  | 0.08  | -                 | -     | -                          | -    |
| Kenya 2015 MIS         | -                  | -      | -                     | -    | -                  | -     | -                 | -     | -                          | -    |
| Lesotho 2009 DHS       | -                  | -      | -                     | -    | -                  | -     | -                 | -     | -                          | -    |
| Lesotho 2014 DHS       | -                  | -      | -                     | -    | -                  | -     | -                 | -     | -                          | -    |
| Liberia 2011 MIS       | -                  | -      | -                     | -    | -                  | -     | -                 | -     | -                          | -    |
| Liberia 2013 DHS       | 0.73 (0.25, 2.12)  | 0.56   | 1.20 (0.20, 7.09)     | 0.84 | 2.04 (0.58, 7.16)  | 0.27  | -                 | -     | -                          | -    |
| Liberia 2016 MIS       | -                  | -      | -                     | -    | -                  | -     | -                 | -     | -                          | -    |
| Madagascar 2008 DHS    | 0.17 (0.05, 0.52)  | 0.002  | -                     | -    | -                  | -     | 1.35 (0.43, 4.28) | 0.61  | 1.82 (0.47, 7.08)          | 0.39 |
| Madagascar 2011 MIS    | -                  | -      | -                     | -    | -                  | -     | -                 | -     | -                          | -    |

**Table I.** Association between improved housing, growth failure and anaemia in children aged 0-5 years in sub-Saharan Africa (crude results)

| Survey                | Low height-for-age |        | Low weight-for-height |      | Low weight-for-age |        | Any anaemia       |        | Moderate to severe anaemia |      |
|-----------------------|--------------------|--------|-----------------------|------|--------------------|--------|-------------------|--------|----------------------------|------|
|                       | OR (95% CI)        | p      | OR (95% CI)           | p    | OR (95% CI)        | p      | OR (95% CI)       | p      | OR (95% CI)                | p    |
| Madagascar 2013 MIS   | -                  | -      | -                     | -    | -                  | -      | -                 | -      | -                          | -    |
| Malawi 2010 DHS       | 0.63 (0.35, 1.14)  | 0.13   | 0.97 (0.23, 3.97)     | 0.96 | 1.02 (0.46, 2.27)  | 0.95   | 0.81 (0.45, 1.44) | 0.47   | 0.90 (0.46, 1.76)          | 0.76 |
| Malawi 2012 MIS       | -                  | -      | -                     | -    | -                  | -      | -                 | -      | -                          | -    |
| Malawi 2014 MIS       | -                  | -      | -                     | -    | -                  | -      | -                 | -      | -                          | -    |
| Malawi 2015 DHS       | 0.65 (0.47, 0.90)  | 0.01   | 1.33 (0.64, 2.78)     | 0.45 | 1.16 (0.80, 1.68)  | 0.43   | 1.21 (0.87, 1.69) | 0.26   | 0.94 (0.70, 1.27)          | 0.70 |
| Malawi 2017 MIS       | -                  | -      | -                     | -    | -                  | -      | -                 | -      | -                          | -    |
| Mali 2012 DHS         | 0.96 (0.62, 1.49)  | 0.85   | 0.55 (0.30, 1.03)     | 0.06 | 0.87 (0.57, 1.33)  | 0.52   | 0.77 (0.53, 1.11) | 0.16   | 0.88 (0.61, 1.26)          | 0.48 |
| Mali 2015 MIS         | -                  | -      | -                     | -    | -                  | -      | -                 | -      | -                          | -    |
| Mozambique 2011 DHS   | 0.92 (0.71, 1.20)  | 0.55   | 1.01 (0.55, 1.86)     | 0.98 | 0.81 (0.56, 1.18)  | 0.27   | 0.88 (0.62, 1.25) | 0.48   | 1.09 (0.74, 1.61)          | 0.66 |
| Mozambique 2015 AIS   | -                  | -      | -                     | -    | -                  | -      | -                 | -      | -                          | -    |
| Namibia 2006 DHS      | 0.54 (0.37, 0.78)  | 0.001  | 0.69 (0.36, 1.30)     | 0.25 | 0.59 (0.40, 0.87)  | 0.01   | -                 | -      | -                          | -    |
| Namibia 2013 DHS      | 0.38 (0.19, 0.77)  | 0.01   | 0.94 (0.44, 2.02)     | 0.88 | 0.64 (0.35, 1.18)  | 0.15   | 0.76 (0.47, 1.24) | 0.27   | 0.91 (0.51, 1.62)          | 0.76 |
| Niger 2012 DHS        | 0.81 (0.47, 1.40)  | 0.46   | 1.43 (0.73, 2.77)     | 0.29 | 0.86 (0.52, 1.41)  | 0.55   | 0.89 (0.54, 1.49) | 0.67   | 1.00 (0.62, 1.63)          | 0.99 |
| Nigeria 2008 DHS      | 1.17 (0.88, 1.54)  | 0.27   | 1.05 (0.69, 1.59)     | 0.83 | 0.97 (0.68, 1.37)  | 0.85   | -                 | -      | -                          | -    |
| Nigeria 2010 MIS      | -                  | -      | -                     | -    | -                  | -      | -                 | -      | -                          | -    |
| Nigeria 2013 DHS      | 0.81 (0.62, 1.06)  | 0.12   | 0.69 (0.53, 0.91)     | 0.01 | 0.79 (0.61, 1.02)  | 0.08   | -                 | -      | -                          | -    |
| Nigeria 2015 MIS      | -                  | -      | -                     | -    | -                  | -      | -                 | -      | -                          | -    |
| Rwanda 2010 DHS       | 0.54 (0.41, 0.71)  | <0.001 | 1.15 (0.54, 2.43)     | 0.71 | 0.50 (0.33, 0.74)  | <0.001 | 0.85 (0.65, 1.12) | 0.26   | 0.87 (0.60, 1.28)          | 0.49 |
| Rwanda 2015 DHS       | 0.58 (0.43, 0.79)  | <0.001 | 0.54 (0.21, 1.39)     | 0.20 | 0.51 (0.31, 0.82)  | 0.01   | 0.58 (0.43, 0.76) | <0.001 | 0.57 (0.37, 0.87)          | 0.01 |
| Rwanda 2017 MIS       | -                  | -      | -                     | -    | -                  | -      | -                 | -      | -                          | -    |
| Senegal 2008 MIS      | -                  | -      | -                     | -    | -                  | -      | -                 | -      | -                          | -    |
| Senegal 2010 DHS      | 1.11 (0.75, 1.64)  | 0.59   | 0.88 (0.54, 1.46)     | 0.63 | 1.01 (0.70, 1.46)  | 0.97   | 0.77 (0.55, 1.09) | 0.14   | 0.87 (0.64, 1.18)          | 0.37 |
| Senegal 2012 DHS      | 0.76 (0.54, 1.08)  | 0.12   | 0.80 (0.52, 1.21)     | 0.28 | 0.78 (0.59, 1.04)  | 0.09   | 0.80 (0.63, 1.02) | 0.07   | 0.89 (0.71, 1.11)          | 0.31 |
| Senegal 2014 DHS      | 0.57 (0.39, 0.85)  | 0.01   | 1.00 (0.64, 1.57)     | 0.99 | 0.76 (0.56, 1.04)  | 0.09   | 0.85 (0.67, 1.07) | 0.17   | 0.70 (0.54, 0.92)          | 0.01 |
| Senegal 2015 DHS      | 0.83 (0.61, 1.13)  | 0.23   | 1.01 (0.68, 1.49)     | 0.97 | 0.77 (0.59, 1.00)  | 0.05   | 0.85 (0.68, 1.06) | 0.16   | 0.86 (0.68, 1.07)          | 0.18 |
| Senegal 2016 DHS      | 0.79 (0.53, 1.17)  | 0.24   | 0.67 (0.43, 1.06)     | 0.09 | 0.68 (0.50, 0.93)  | 0.02   | 0.87 (0.68, 1.11) | 0.25   | 0.84 (0.66, 1.08)          | 0.18 |
| Sierra Leone 2008 DHS | 0.49 (0.23, 1.04)  | 0.06   | 0.68 (0.22, 2.16)     | 0.52 | 0.49 (0.20, 1.18)  | 0.11   | 1.24 (0.37, 4.14) | 0.73   | 0.99 (0.29, 3.30)          | 0.98 |
| Sierra Leone 2013 DHS | 0.96 (0.65, 1.43)  | 0.86   | 1.08 (0.54, 2.18)     | 0.82 | 1.28 (0.80, 2.05)  | 0.31   | 1.00 (0.65, 1.54) | 1.00   | 1.08 (0.74, 1.57)          | 0.70 |
| Sierra Leone 2016 MIS | -                  | -      | -                     | -    | -                  | -      | -                 | -      | -                          | -    |
| Tanzania 2004 DHS     | -                  | -      | -                     | -    | -                  | -      | -                 | -      | -                          | -    |
| Tanzania 2010 DHS     | 0.65 (0.45, 0.92)  | 0.02   | 0.68 (0.38, 1.24)     | 0.21 | 0.75 (0.50, 1.13)  | 0.17   | 0.88 (0.66, 1.16) | 0.36   | 0.86 (0.62, 1.18)          | 0.35 |
| Tanzania 2012 AIS     | -                  | -      | -                     | -    | -                  | -      | -                 | -      | -                          | -    |
| Tanzania 2017 MIS     | -                  | -      | -                     | -    | -                  | -      | -                 | -      | -                          | -    |
| Togo 2013 DHS         | 0.79 (0.47, 1.31)  | 0.36   | 1.44 (0.69, 2.98)     | 0.33 | 0.69 (0.42, 1.14)  | 0.15   | 0.67 (0.46, 0.97) | 0.03   | 0.58 (0.40, 0.86)          | 0.01 |

**Table I.** Association between improved housing, growth failure and anaemia in children aged 0-5 years in sub-Saharan Africa (crude results)

| Survey            | Low height-for-age |      | Low weight-for-height |      | Low weight-for-age |      | Any anaemia       |      | Moderate to severe anaemia |      |
|-------------------|--------------------|------|-----------------------|------|--------------------|------|-------------------|------|----------------------------|------|
|                   | OR (95% CI)        | p    | OR (95% CI)           | p    | OR (95% CI)        | p    | OR (95% CI)       | p    | OR (95% CI)                | p    |
| Uganda 2006 DHS   | 0.86 (0.30, 2.48)  | 0.78 | 0.26 (0.03, 2.41)     | 0.24 | 0.43 (0.09, 2.15)  | 0.30 | 0.22 (0.07, 0.72) | 0.01 | 0.45 (0.13, 1.58)          | 0.21 |
| Uganda 2009 MIS   | -                  | -    | -                     | -    | -                  | -    | -                 | -    | -                          | -    |
| Uganda 2014 MIS   | -                  | -    | -                     | -    | -                  | -    | -                 | -    | -                          | -    |
| Uganda 2016 DHS   | 0.42 (0.18, 0.97)  | 0.04 | 1.79 (0.38, 8.52)     | 0.46 | 0.47 (0.19, 1.15)  | 0.10 | 1.04 (0.60, 1.77) | 0.90 | 1.00 (0.57, 1.74)          | 1.00 |
| Zambia 2007 DHS   | 0.70 (0.48, 1.02)  | 0.06 | 1.13 (0.54, 2.36)     | 0.74 | 0.75 (0.46, 1.21)  | 0.24 | -                 | -    | -                          | -    |
| Zambia 2013 DHS   | 0.88 (0.73, 1.06)  | 0.18 | 0.75 (0.52, 1.10)     | 0.14 | 0.77 (0.61, 0.98)  | 0.03 | -                 | -    | -                          | -    |
| Zimbabwe 2005 DHS | 0.94 (0.73, 1.22)  | 0.66 | 0.85 (0.51, 1.41)     | 0.52 | 0.81 (0.57, 1.15)  | 0.24 | 0.86 (0.67, 1.12) | 0.27 | 0.97 (0.74, 1.27)          | 0.82 |
| Zimbabwe 2010 DHS | 0.73 (0.56, 0.94)  | 0.01 | 1.13 (0.63, 2.03)     | 0.69 | 0.80 (0.57, 1.12)  | 0.19 | 0.85 (0.67, 1.09) | 0.20 | 0.94 (0.72, 1.23)          | 0.67 |
| Zimbabwe 2015 DHS | 0.76 (0.57, 1.01)  | 0.05 | 0.54 (0.29, 1.04)     | 0.06 | 0.72 (0.49, 1.06)  | 0.10 | 1.03 (0.80, 1.31) | 0.82 | 1.16 (0.87, 1.55)          | 0.32 |

AIS: AIDS Indicator Survey; CI: confidence intervals; DHS: Demographic and Health Survey; DRC: Democratic Republic of the Congo; MIS: Malaria Indicator Survey; OR: Odds Ratio. All p-values are calculated using the likelihood ratio test.
